# Supplementary material for: Functionalizing with glycopeptide dendrimers significantly enhances the hydrophilicity of the magnetic nanoparticles
Source: Royal Society of Chemistry journal article supplement (doi:10.1039/c5cc00187k), 2015-01-01
Supplement: c5cc00187k1.pdf [file c5cc00187k1.pdf]

## Supporting information

### Functionalizing with Glycopeptide Dendrimers Significantly Enhances the Hydrophilicity of the Magnetic Nanoparticles

Jinan Li,<sup>ab</sup> Fangjun Wang<sup>\*a</sup>, Jing Liu,<sup>ab</sup> Zhichao Xiong,<sup>ab</sup> Guang Huang,<sup>ab</sup>  
Hao Wan,<sup>ab</sup> Zheyi Liu,<sup>ab</sup> Kai Cheng,<sup>ab</sup> and Hanfa Zou<sup>\*a</sup>

<sup>a</sup> CAS Key Laboratory of Separation Sciences for Analytical Chemistry, National Chromatographic R&A Center, Dalian Institute of Chemical Physics, Chinese Academy of Sciences (CAS), Dalian 116023, China;

<sup>b</sup> University of Chinese Academy of Science, Beijing 100049, China.

\* E-mail: wangfj@dicp.ac.cn, hanfazou@dicp.ac.cn

## Experiment details

### Materials and reagents

Tetraethoxysilane (TEOS), 3-aminopropyltriethoxysilane (APTES), ammonia solution (25%), 1-(3-dimethylaminopropyl)-3-ethylcarbodiimide hydrochloride (EDC), N-hydroxysuccinimide (NHS), human serum immunoglobulin G (human IgG), trypsin, dithiothreitol (DTT), iodoacetamide (IAA) and 2,5-dihydroxyl benzoic acid (DHB) were purchased from Sigma-Aldrich (St, Louis, MO, USA). PNGase F was obtained from New England Biolabs (Ipswich, MA). Acetonitrile (ACN), trifluoroacetic acid (TFA) and formic acid were purchased from Merck (Darmstadt, Germany). Tris and urea were purchased from BioRad (Hercules, CA, USA). The branched oligopeptides with N<sub>3</sub>-modification as shown in **Scheme S1** were obtained from Chinese Peptides Company (Hangzhou, China). Copper(II) sulfate, ascorbic acid, iron(III) chloride hexahydrate (FeCl<sub>3</sub>·6H<sub>2</sub>O), sodium acetate (NaAc), potassium carbonate (K<sub>2</sub>CO<sub>3</sub>), potassium dihydrogen phosphate (KH<sub>2</sub>PO<sub>4</sub>), ammonium bicarbonate (NH<sub>4</sub>HCO<sub>3</sub>), anhydrous ethanol, anhydrous methanol, isopropanol and dichloromethane were obtained from Tianjin Kermel plant of chemical reagent (Tianjin, China). β-D-maltose octaacetate was purchased from Bonuo Chemical (Dalian, China). Pure water was prepared with a Milli-Q system (Millipore, Bedford, MA, USA).

### 20 Synthesis of magnetic nanoparticles

Synthesis of NH<sub>2</sub>-modification of Fe<sub>3</sub>O<sub>4</sub>@SiO<sub>2</sub> (MNPs-NH<sub>2</sub>):

Fe<sub>3</sub>O<sub>4</sub> nanoparticles were synthesized according to the method reported previously.<sup>[1]</sup> 150 mg of the prepared Fe<sub>3</sub>O<sub>4</sub> nanoparticles which were washed with ethanol and water for six times were redispersed in 200 mL ethanol/water (80:20, v/v) and sonicated for 1 h. After the addition of 2 mL ammonia solution, 1.0 mL TEOS was added dropwise. The mixed solution was stirred for 8 h at room temperature. After being washed with ethanol, water and isopropanol, the obtained Fe<sub>3</sub>O<sub>4</sub>@SiO<sub>2</sub> MNPs were redispersed in 50 mL isopropanol. The mixture was sonicated for 1 h, followed by the addition of 1.0 mL APTES. Then the system was stirred for 24 h at

room temperature. The resulting magnetic nanoparticles were collected with a magnet.

#### Synthesis of $\text{Fe}_3\text{O}_4@\text{SiO}_2\text{-dN}_3$ (MNPs-d $\text{N}_3$ ):

20 mg  $\text{N}_3$ -modification of peptides were dissolved in PBS solution (10 mM, 5 PH=5.5), followed by the addition of 50 mg EDC and 50 mg NHS. Then the solution was shook for 30 min. After the addition of 20 mg MNPs-NH<sub>2</sub>, the system was sonicated for 5 min and shook at room temperature for 36 h. And every 4 h, another 50mg EDC and 50 mg NHS were added into the solution. After 36 h, the MNPs-d $\text{N}_3$  was obtained, washed with ethanol and water for six times and then dispersed in 4 mL 10 methanol/water (50:50, v/v) for further use.

#### Synthesis of $\text{Fe}_3\text{O}_4@\text{SiO}_2\text{-N}_3$ (MNPs-N<sub>3</sub>):

In a dried flask under nitrogen, the obtained 20 mg MNPs-NH<sub>2</sub> were dispersed in 40 ml anhydrous dichloromethane. After the addition of 1.5mL distilled triethylamine, the whole solution was put in an ice bath under argon atmosphere and cooled to 0°C. 15 Then 1mL 2-bromoisobutyryl bromide was added, leaving mechanically stirred for 2 h at 0 °C and then at room temperature for 16 h. The obtained MNPs (denoted as  $\text{Fe}_3\text{O}_4@\text{SiO}_2\text{-Br}$  MNPs) were isolated and washed with dichloromethane, ethanol and water for three times, respectively, and dried in the vacuum oven overnight at 50°C. 50 mg  $\text{Fe}_3\text{O}_4@\text{SiO}_2\text{-Br}$  MNPs was dispersed in 30 mL N, N-dimethylformamide 20 solution containing 230 mg sodium azide and 167 mg ammonium chloride for 26 h at 50°C. The obtained materials (designed as MNPs-N<sub>3</sub>) were isolated, washed with N, N-dimethylformamide, water, and methanol, and dried in the vacuum oven overnight at 50°C.

#### Synthesis of 1-propargyl-O-maltose:

25 1-propargyl-O-maltose was synthesized according to a reported method.<sup>[2]</sup> 10.0 g  $\beta$ -D-maltose octaacetate was dissolved in 150 mL dichloromethane, followed by the addition of 1.0 mL propargylalcohol. Then the mixture into which 3.0 mL boron trifluoride/ether was added was stirred at 0°C for 1 h and at room temperature for additional 4 h. After the addition of 5.0 g potassium carbonate and being stirred for 30 30 min, the system was filtered and the filtrate was concentrated. The 1-propargyl-acetyl-

maltose ( $m/z$  at 697.2  $[M+Na]^+$ ) was obtained and was dissolved in 30 mL anhydrous methanol. Then 12 mL sodium methoxide in methanol (1 M) was added dropwise and the solution was stirred at room temperature for about 6 h. After quenched by neutralization, the reaction solution was filtered, concentrated and dried in the vacuum oven overnight at room temperature. 1-propargyl-O-maltose was obtained and used without further treatment.  $[M+Na]^+=402.8$ ;  $^1H$  NMR (500 MHz,  $D_2O$ , HOD): 5.38 (d,  $J=3.09$  Hz, 1H), 4.63 (d,  $J=7.95$  Hz, 1H), 3.91-3.53 (m, 12H), 3.38 (t,  $J=9.55$  Hz, 1H), 3.30 (t,  $J=8.72$  Hz, 1H);  $^{13}C$  NMR (125 MHz,  $D_2O$ ): 98.18 ( $\alpha$ Glc1), 97.32 ( $\beta$ Glc1), 76.18 ( $-CH_2-CCH$ ), 74.51, 73.87, 72.39 ( $-CH_2-CCH$ ), 70.57, 70.51, 70.44, 69.39, 67.09, 65.59, 58.40 (Glc6), 58.24 (Glc6), 54.28( $-CH_2-CCH$ )

#### Synthesis of dM-MNPs or M-MNPs

MNPs-d $N_3$  or MNPs-N $_3$  were dispersed in 4 mL methanol/water (50:50, v/v) and sonicated for 30 min. 30  $\mu$ L catalysts solution (ascorbic acid : copper (II) sulfate = 200:100, mM/mM) was added, followed by the addition of 5 mg 1-propargyl-O-maltose. Then this system was shook about 12 h. The resulting MNPs were collected, rinsed with methanol, ethanol and water for nine times and dried in the vacuum oven at 40°C.

#### Characterization

Transmission electron microscopy (TEM) image was obtained by JEOL JEM-2000 EX transmission electron microscope (JEOL, Tokyo, Japan). Fourier-transformed infrared spectroscopy (FT-IR) characterization has been performed on Thermo Nicolet 380 spectrometer using KBr pellets (Nicolet, Wisconsin, USA). The saturation magnetization curve was carried out at room temperature on the Physical Property Measurement System 9T (Quantum Design, San Diego, USA). The water contact angles were measured with an OCA20 contact angle system (Dataphysics, Germany) at ambient temperature. Proton nuclear magnetic resonance ( $^1H$  NMR) spectra were recorded on a Bruker 500 MHz spectrometer. Carbon nuclear magnetic resonance ( $^{13}C$  NMR) spectra were recorded on a Bruker 125 MHz spectrometer. Elemental analyses were performed on Vario EL III (Elementar, Hanau, Germany). And the amount of maltose functionalized on the surface of magnetic nanoparticles

were calculated based the change of carbon content between before and after click reaction according to a reported method.<sup>4</sup>

$$\chi_{\text{maltose}}(\text{nmol. mg}^{-1}) = \frac{\%X * 10^6}{(AM)n100(1 - \%X(MW)/(AM)n100)} \quad \text{Eq. S1}$$

where %X is the percent of carbon increase in the bonded support as determined by  
5 elemental analysis, *AM* is the atomic mass of carbon, *MW* is the molecular weight of the species bonded to the surface of support, *n* is the number of carbon atoms present in the bonded species.

### Trypsin digest of proteins

2 mg human IgG was dissolved in 1 mL denaturing buffer containing 100 mM  
10 NH<sub>4</sub>CO<sub>3</sub> and 8 M urea. After addition of 20 μL DTT (1 M) and being kept at 60°C for 1 h, the protein was alkylated by 7.4 mg IAA at room temperature in the dark for 40 min. Then the solution was diluted by 7 mL NH<sub>4</sub>HCO<sub>3</sub> (100mM) and digested with trypsin (protein: enzyme = 25:1, w/w) for 16 h. After digest being quenched by the addition of pure FA, the peptide mixture was desalted by SPE column, lyophilized  
15 and kept at -20°C for long time use.

The proteins (2 mg) from mouse liver were dissolved in 1 mL denaturing buffer containing 50 mM Tris-HCl and 8 M urea. After addition of 20 μL DTT (1 M) at 60°C for 1 h, the proteins were alkylated by 7.4 mg IAA at room temperature in the dark for 40 min. Then the solution was diluted by 7 mL 50 mM Tris-HCl and digested  
20 with trypsin (protein: enzyme = 25:1, w/w) for 16 h. Digestion was stopped by pure FA, and the peptides mixture were desalted by SPE column, lyophilized and kept at -20°C for long time use.

### Enrichment of glycopeptides

20 μg dM-MNPs was washed three times and suspended in 400 μL  
25 ACN/H<sub>2</sub>O/TFA (88:7:5, v/v/v). And glycopeptide mixtures which were dissolved in ACN/H<sub>2</sub>O/TFA (88:7:5, v/v/v) were added. The enrichment was carried out gently at room temperature for 30 min. After washed by ACN/H<sub>2</sub>O/TFA (88:7:5, v/v/v) to remove non-glycopeptides, the MNPs was incubated with 2×10 μL ACN/H<sub>2</sub>O/TFA

(30:69.9:0.1, v/v/v) to collect glycopeptides. The collected peptides were analyzed by MALDI-TOF MS, or deglycosylation for LC-MS/MS analyses.

800  $\mu\text{g}$  dM-MNPs was washed three times and suspended in 400  $\mu\text{L}$  ACN/H<sub>2</sub>O/TFA (88:10:2, v/v/v). And glycopeptide mixtures which were dissolved in 5 ACN/H<sub>2</sub>O/TFA (88:10:2, v/v/v) were added. The enrichment was carried out gently at room temperature for 30 min. After washed by ACN/H<sub>2</sub>O/TFA (88:10:2, v/v/v) to remove non-glycopeptides, the MNPs was incubated with 2 $\times$ 30  $\mu\text{L}$  ACN/H<sub>2</sub>O/TFA (30:69.9:0.1, v/v/v) to collect glycopeptides. The collected peptides were deglycosylation for LC-MS/MS analyses.

#### 10 **Deglycosylation of glycopeptides by PNGase F**

Glycopeptides collected from enrichment procedure were lyophilized and re-dissolved in 30  $\mu\text{L}$  NH<sub>4</sub>HCO<sub>3</sub> (10 mM), followed by addition of 50 units of PNGase F (0.1  $\mu\text{L}$ ). Then the reaction was carried out at 37°C for 12 h and quenched by heating to 100°C. And the peptide was analyzed by MALDI-TOF MS.

#### 15 **Evaluation of binding capacity of dM-MNPs**

Different amounts (5-100 $\mu\text{g}$ ) of dM-MNPs were used to treat 3  $\mu\text{g}$  human IgG digest for four independent times. Then 4 $\times$ 0.5  $\mu\text{L}$  of the elution was analyzed with MALDI-TOF MS. When the peak intensity of six selected glycopeptides reach maximum, the total amount of glycopeptides were bonded onto the MNPs. The 20 binding capacity was calculated by the amount of human IgG to MNPs.

#### **Recovery estimation of enrichment of glycopeptides**

Two aliquot of human IgG tryptic digest (3  $\mu\text{g}$ ) were labeled with light and heavy isotopes by using a stable isotope dimethyl labeling approach according to a reported method.<sup>[3]</sup> The heavy-tagged tryptic digest was enriched with dM-MNPs and the 25 elution was added into light-tagged tryptic digest. The mixture was then enriched with dM-MNPs and analyzed by MALDI-TOF MS. The recovery was calculated by the peak intensity ration of heavy isotope-labeled glycopeptides to the light isotope-labeled glycopeptides.

#### **Measurement of adsorption isotherm**

1 mg dM-MNPs or M-MNPs were added into 400  $\mu$ L HRP solution (88%ACN+0.1%TFA). The mixture was shaken overnight at room temperature. Then magnetic materials were collected and washed by 88%ACN+0.1%TFA. HRP adsorbed onto materials were released in 30%ACN+0.1%TFA. The amount of released HRP was determined by UV-vis spectrophotometry at 403 nm.

### Mass spectrometry

Standard glycopeptides were analyzed on an AB Sciex 5800 MALDI-TOF/TOF mass spectrometer (AB, SCIEX, USA) with a pulsed Nd/YAG laser at 355 nm in linear positive ion mode. As a kind matrix, 25 mg DHB was dissolved in 1 mL ACN/H<sub>2</sub>O/H<sub>3</sub>PO<sub>4</sub> (70:29:1, v/v/v). 0.5  $\mu$ L of standard glycopeptides and 0.5  $\mu$ L matrix were dropped onto plate stepwisely for next analysis.

The proteins from mouse liver were analyzed on a Thermo Q Exactive mass spectrometer (Thermo, San Jose, CA) with a nanospray ion source and a U3000 RSLCnano system (Thermo, San Jose, CA, USA). After being enriched and lyophilized, the tryptic peptides were re-dissolved in FA/H<sub>2</sub>O (0.1:99.9, v/v) and loaded on a trap column (200  $\mu$ m i.d.) with C<sub>18</sub> AQ beads (5 $\mu$ m, 120 Å, Daiso, Osaka, Japan). After the peptides were separated by a capillary analysis column (75  $\mu$ m i.d.) with C<sub>18</sub> AQ beads (3 $\mu$ m, 120 Å, Daiso, Osaka, Japan) in a linear gradient where ACN/H<sub>2</sub>O/FA (buffer B, 80:19.9:0.1, v/v) was programmed as: from 0 to 4% for 15 min, from 4 to 45% for 145 min and from 45 to 90% for 5 min at a flow rate of 0.3  $\mu$ L/min, the separation system was equilibrated by FA/H<sub>2</sub>O (buffer A, 0.1:99.9, v/v) for 15 min and peptides were analyzed in a data-independent MS/MS collision induced dissociation (CID) mode. And full mass scan was acquired from m/z 400 to 2000 with resolution of 70 000. The 12 most intense ions with charge  $\geq 2$  and above an intensity threshold of  $10^4$  were selected for MS/MS. The dynamic exclusion was set as 30s.

### Database searching

All the LC-MS/MS raw files were analyzed with Maxquant software (version 1.3.0.5) against a database (uniprot. mouse. fasta, downloaded on Dec 11, 2013). The mass tolerances were 20 ppm for initial precursor ions and 0.5 Da for fragment ions.

And for trypsin restriction, two missed cleavages were allowed. The cut off false discovery (FDR) for peptide identifications was controlled to < 1%. Only glycopeptides with N-!P-S/T or the N-X-C were considered as highly reliable results.

## References

- 5 [1] J. Ge, Q. Zhang, T. Zhang, Y. Yin, *Angew. Chem. Int. Ed.* 2008, **47**, 8924-8928.  
 [2] Z. Xiong, L. Zhao, F. Wang, J. Zhu, H. Qin, R. Wu, W. Zhang, H. Zou, *Chem. Commun.* 2012, **48**, 8138-8140.  
 [3] P. J. Boersema, R. Raijmakers, S. Lemeer, S. Mohammed, A. J. Heck, *Nat. Protoc.* 2009, **4**, 484-494.  
 10 [4] C. E. Kibbey, M. E. Meyerhoff, *Anal. Chem.* 1993, **65**, 2189-2196.

## Supplementary Schemes, Tables and Figures

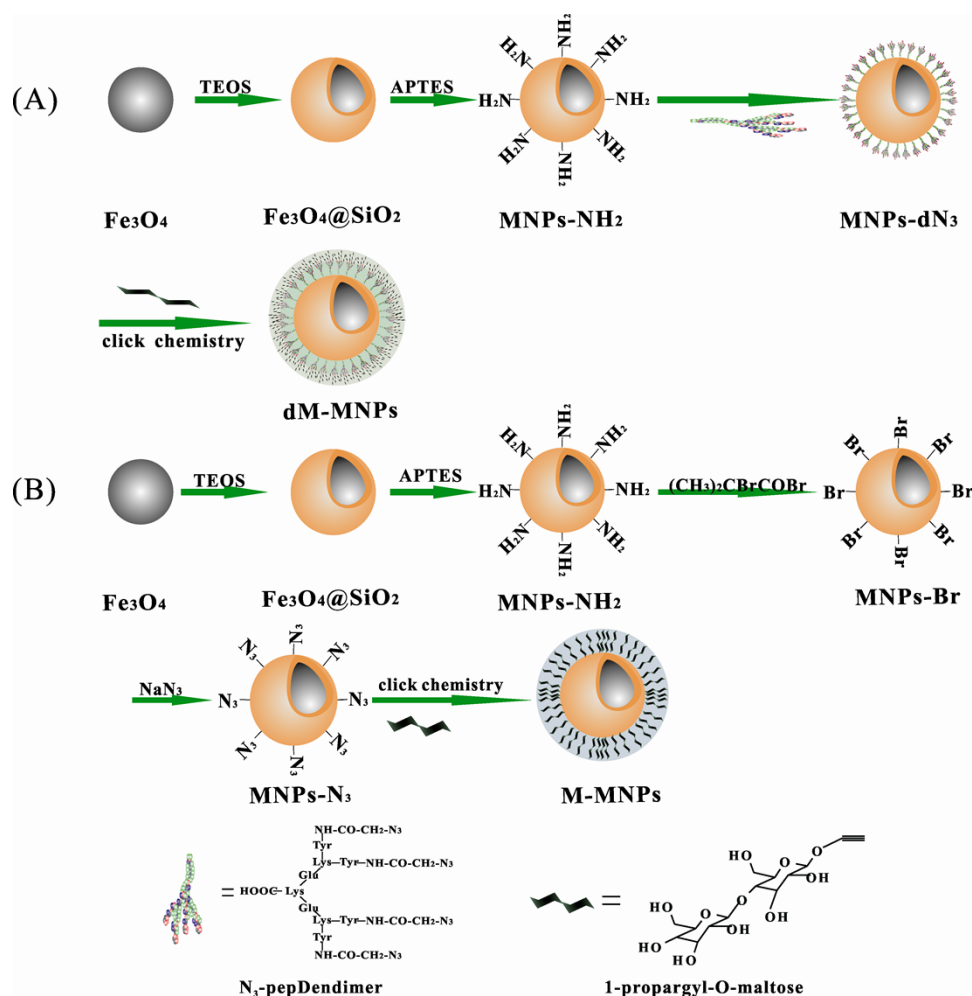

**Scheme S1** Illustration of consecutive steps for synthesis of dM-MNPs and M-MNPs.



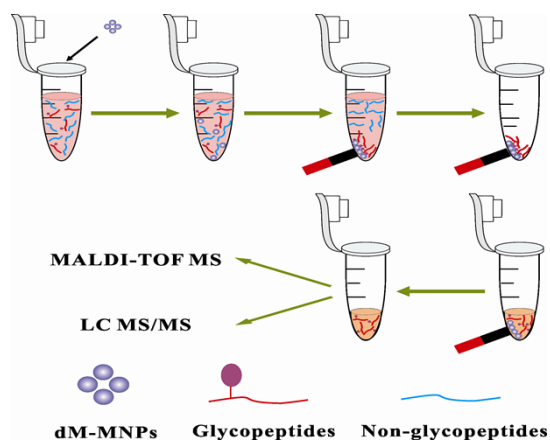

**Scheme S2** The workflow of *N*-glycopeptides enrichment from biological samples by using dM-MNPs and M-MNPs.

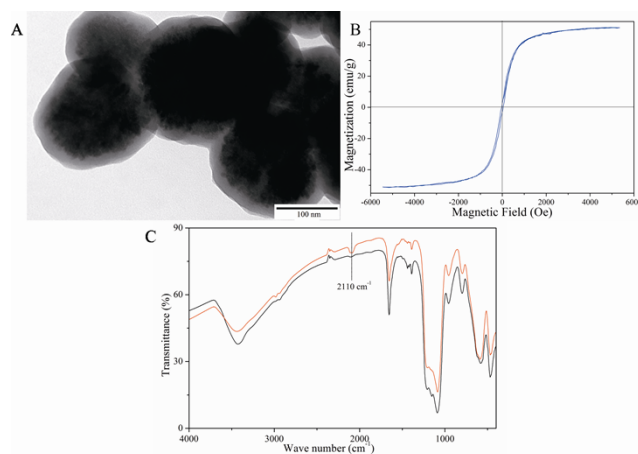

5 **Figure S1** (A) TEM image and (B) hysteresis loop of M-MNPs, (C) FT-IR spectra of (a) MNPs-N<sub>3</sub> and M-MNPs.

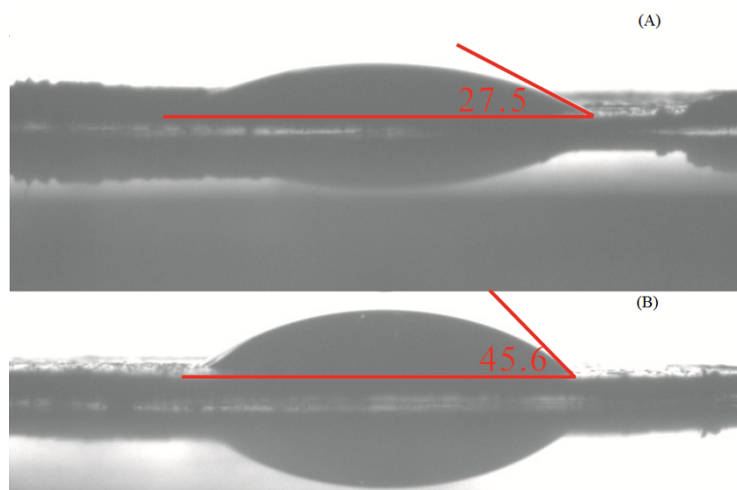

**Figure S2** The water contact angles of A) dM-MNPs and (B) M-MNPs.

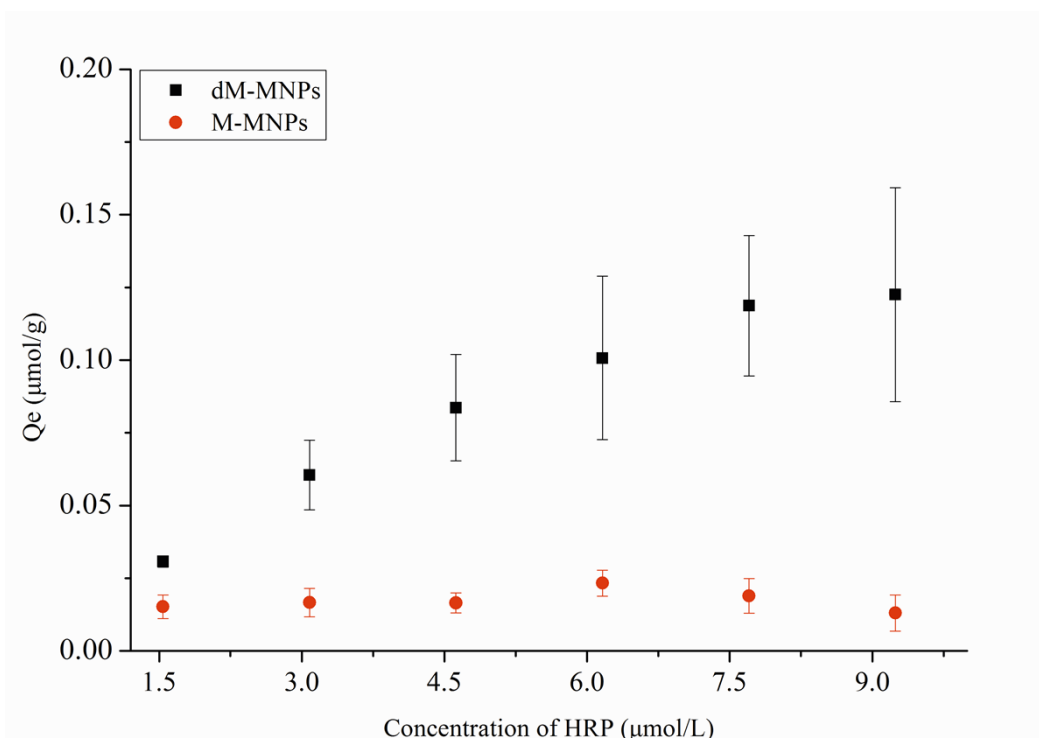

**Figure S3** Binding isotherms for the binding of dM-MNPs and M-MNPs with HRP.

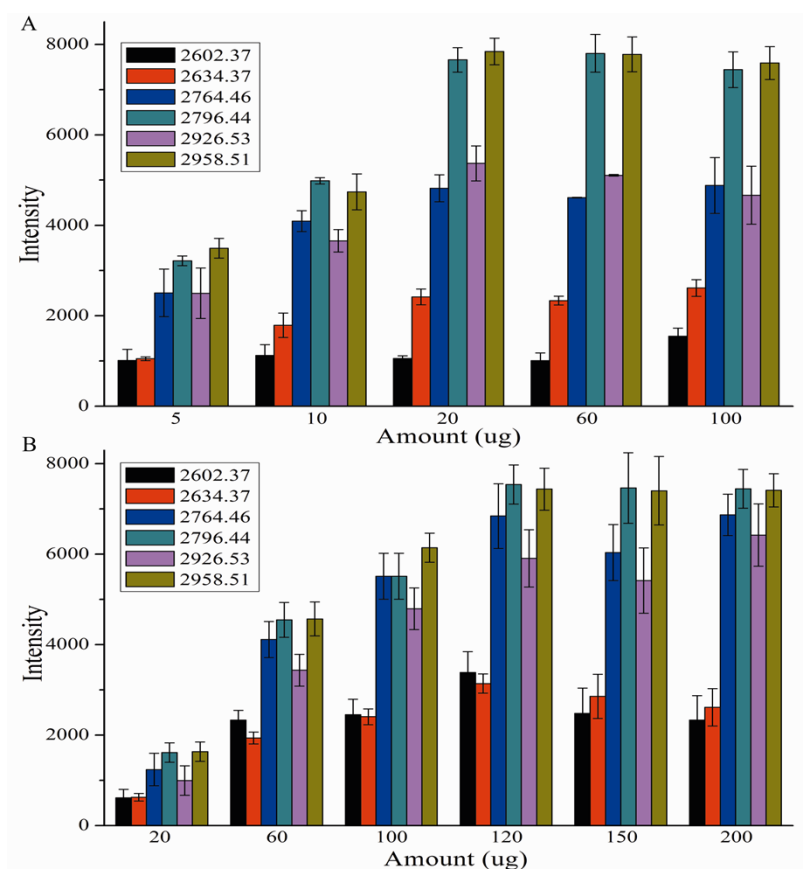

**Figure S4** The intensity of six selected N-glycopeptides from 3  $\mu$ g human IgG tryptic digest after enrichment by different amount of (A) dM-MNPs and (B) M-MNPs.

**Table S1.** Molecular masses and glycan structure of the *N*-glycopeptides from human IgG after enrichment by dM-MNPs. N\* denotes the N-linked glycosylation sites

| Peak number | m/z     | Glycan structure                                                                     | Amino acid sequence |
|-------------|---------|--------------------------------------------------------------------------------------|---------------------|
| I1          | 2399.28 | 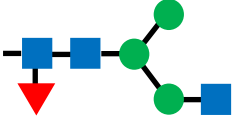    | EEQFN*STFR          |
| I2          | 2431.26 |     | EEQYN*STYR          |
| I3          | 2488.27 |     | EEQYN*STYR          |
| I4          | 2561.35 |    | EEQFN*STFR          |
| I5          | 2593.32 |  | EEQYN*STYR          |
| I6          | 2602.37 |   | EEQFN*STFR          |
| I7          | 2619.37 |  | EEQFN*STFR          |
| I8          | 2634.37 |   | EEQYN*STYR          |
| I9          | 2650.35 |  | EEQYN*STYR          |
| I10         | 2764.46 |  | EEQFN*STFR          |

|     |         |  |            |
|-----|---------|--|------------|
| I11 | 2778.43 |  | EEQFN*STFR |
| I12 | 2796.44 |  | EEQYN*STYR |
| I13 | 2805.45 |  | EEQFN*STFR |
| I14 | 2812.43 |  | EEQYN*STYR |
| I15 | 2819.43 |  | EEQFN*STFR |
| I16 | 2837.45 |  | EEQYN*STYR |
| I17 | 2853.51 |  | EEQYN*STYR |
| I18 | 2926.53 |  | EEQFN*STFR |
| I19 | 2958.51 |  | EEQYN*STYR |
| I20 | 2967.53 |  | EEQFN*STFR |
| I21 | 2981.46 |  | EEQFN*STFR |
| I22 | 2999.51 |  | EEQYN*STYR |

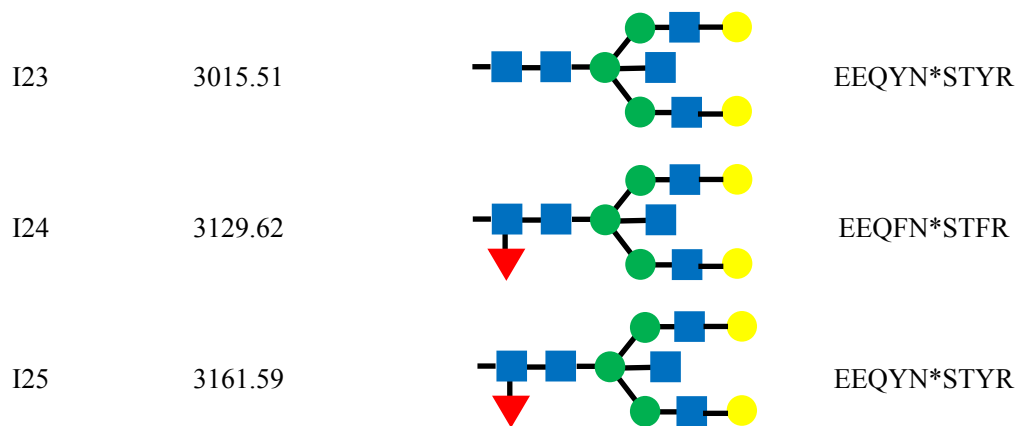

**Table S2** Recovery of six selected glycopeptides from human IgG digest

| Peak number | m/z     | Recovery±S.D. (%; n=5) |
|-------------|---------|------------------------|
| I7          | 2602.40 | 78±1.9                 |
| I9          | 2634.38 | 91±5.8                 |
| I12         | 2764.49 | 89±6.0                 |
| I14         | 2796.47 | 92±4.7                 |
| I20         | 2926.56 | 90±9.0                 |
| I21         | 2958.54 | 91±4.6                 |

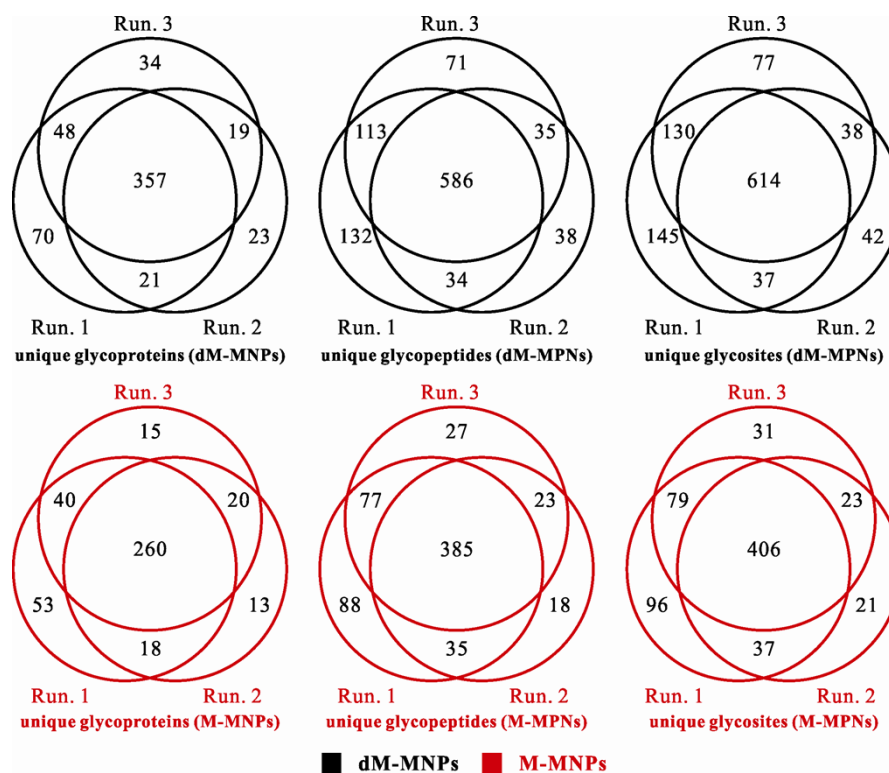

**Figure S5** Overlap of *N*-glycoproteins, *N*-glycopeptides and *N*-glycosylation sites identified by dM-MNPs and M-MNPs.

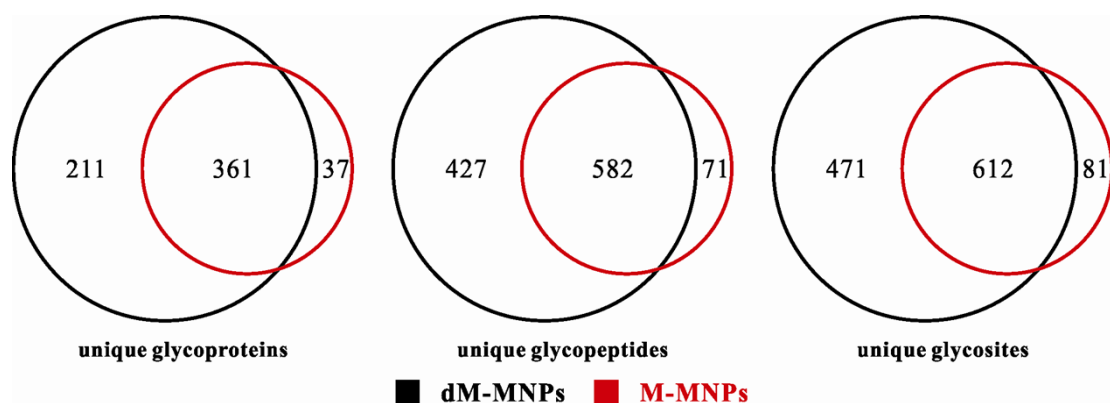

**Figure S6** Overlaps of the identified *N*-glycoproteins, unique *N*-glycopeptides and *N*-glycosylation sites by using dM-MNPs and M-MNPs for protein sample extracted from mouse liver.

5 **Table S3** List of identified *N*-glycopeptides from protein sample extracted from mouse liver by dM-MNPs. N\* denotes the *N*-linked glycosylation sites.

| No | Protein | Protein names                             | Modified sequence                                                                                                               |
|----|---------|-------------------------------------------|---------------------------------------------------------------------------------------------------------------------------------|
| 1  | A2A7A7  | GDH/6PGL endoplasmic bifunctional protein | _NIN*SSCRPHPGAWLR_                                                                                                              |
| 2  | A2AJQ3  | Protein dpy-19 homolog 4                  | _GVYELTHNN*K_                                                                                                                   |
| 3  | A2AQ53  | Fibrillin-1                               | _AWGTPCELCPNVN*TSEYK_<br>_DACGN*GTCR_<br>_N*CTDIDECR_<br>_VLPFN*VTDYCQLVR_<br>_CTDLDECSN*GTHMCSQHAD<br>CK_                      |
| 4  | A2AQJ6  | Transmembrane protein 87A                 | _LFQN*CSELYK_<br>_QEAKEN*ATN*VTFTGDK_                                                                                           |
| 5  | A2ARA8  | Integrin alpha-8                          | _VN*GTKEPIEFK_                                                                                                                  |
| 6  | A2AS37  | Protein AI182371                          | _LEIVPIIYDN*DSLQVQTDK_                                                                                                          |
| 7  | A2AW86  | Lymphocyte antigen 75                     | _LAN*ISGEEQK_                                                                                                                   |
| 8  | A6H584  | Collagen alpha-5(VI) chain                | _SSAN*QSEFQQQIQK_<br>_SN*DSVLEPANR_<br>_AEQITIHAIGIGEAN*KTQLR_<br>_YQEIIIELESSLN*KTQWK_<br>_DLGMFAPN*MTR_<br>_DLQNFLN*VTSSVDVK_ |
| 9  | A6X935  | Inter alpha-trypsin inhibitor, heavy      | _ISASGAELEALEAQVLN*LSL                                                                                                          |

|    |        |                                                  |                                                                                                                                                                                                                             |
|----|--------|--------------------------------------------------|-----------------------------------------------------------------------------------------------------------------------------------------------------------------------------------------------------------------------------|
|    |        | chain 4                                          | K_<br>_VSGQMhMQN*ITFQTEASVA<br>QqEK_<br>_GLMllLN*DTQHFSNNVK_<br>_VYVGN*ASVAQDITQLQK_                                                                                                                                        |
| 10 | B1AQF4 | Dual specificity protein<br>phosphatase 3        |                                                                                                                                                                                                                             |
| 11 | B1AR74 | Breast carcinoma-amplified<br>sequence 3 homolog | _LTSQDSYNN*FTNNNPGNPR_                                                                                                                                                                                                      |
| 12 | B1ATV0 | H(+)/Cl(-) exchange transporter 5                | _LCDYENHFN*TSK_                                                                                                                                                                                                             |
| 13 | B2RT14 | MCG14318, isoform CRA_h                          | _TCTNILHN*ESLLHHLN*SSSF<br>DVVFTDPVFPcGALLAK_<br>_N*MSTVLLK_                                                                                                                                                                |
| 14 | B2RT89 | Predicted gene, EG434674                         | _CWAPILDN*DTASDN*GSR_<br>_FAQPQWHLHLN*GTFSN*E<br>TEPDTEPCVDGWVYDR_                                                                                                                                                          |
| 15 | B2RXS4 | Plexin-B2                                        | _EKIEANRN*ACYTGAR_<br>_SCVAITDAFPQN*MSR_<br>_AMSN*ISVR_<br>_TEAGVFEYVADPTFEN*FTG<br>GVKK_<br>_QGPQAGGTTLTIN*GTHLDT<br>GSKEDVR_<br>_LSHDGN*ETLPLHLYVK_<br>_CVYEALCSN*VTSECPPPvIT<br>R_<br>_VVFLSPAVPEEPEAYN*LTVL<br>IR_      |
| 16 | B5THE2 | Maltase-glucoamylase                             | _IDCYPDEHGASEAN*CSAR_<br>_IwVN*SSDGISPvIGK_<br>_LVIIIDPAISN*NSFSSNPYGP<br>YDR_<br>_YGYEN*DTEIANLYDEMvAK<br>_<br>_VILILDPAISGN*ETEPYPAFT<br>R_<br>_RQDPVSWN*K_<br>_GCIWEASN*TTR_<br>_FSVN*QTLLTHEK_<br>_VWPDYPN*ITVDPSLGWDHQ |

|    |        |                                                                   |                                                                                                                                                 |
|----|--------|-------------------------------------------------------------------|-------------------------------------------------------------------------------------------------------------------------------------------------|
| 17 | B8JK39 | Protein Itga9                                                     | VEQYR_<br>_VLN*LTDNTYFK_<br>_N*QTVFER_                                                                                                          |
| 18 | D3YW52 | Alpha-2-macroglobulin                                             | _VN*LSFPSAQSLPASDTHLK_<br>_IN*VSYTGERPSSNMVIVDVK<br>_<br>_SLGEVN*FTATAEALQSPELC<br>GNK_<br>_LTN*QTLGFSFAVEQDIPVK_<br>_GAMITHQNIIN*DCSGFIK_      |
| 19 | D3Z041 | Long-chain-fatty-acid--CoA ligase<br>1                            | _LLNDYVSN*QTQGMIK_<br>_N*ATSYPPMCSQDAVAVQLL<br>SDMLSTKK_<br>_CN*VSSPIFK_<br>_KCEAN*LTLSSPAR_<br>_TSSEFCQPVSLHGSN*HTSK_<br>_KFN*STQIAAMAPEHEEPR_ |
| 20 | D3Z451 | MCG54087                                                          |                                                                                                                                                 |
| 21 | D3Z5G7 | Protein Ces1b                                                     |                                                                                                                                                 |
| 22 | D3Z627 | Integrin alpha-L                                                  |                                                                                                                                                 |
| 23 | D3Z6W7 | Glucoside xylosyltransferase 1                                    |                                                                                                                                                 |
| 24 | E0CYM8 | Tyrosine-protein phosphatase non-<br>receptor type substrate 1    | _GIAN*LSNFIR_                                                                                                                                   |
| 25 | E9PV38 | Protein Ces2g                                                     | _LN*LTEEEK_<br>_DGTSQPAICPQN*VTMNMEG<br>LK_<br>_ALN*GSALYTGSSLDIVR_<br>_QLINALQIN*NTAVGHALVLP<br>ARR_<br>_GPPGVN*GTQGFQGCPCGQR_<br>_SLN*CTVK_   |
| 26 | E9PWQ3 | Protein Col6a3                                                    |                                                                                                                                                 |
| 27 | E9PXN7 | UDP-glucuronosyltransferase 1-9                                   |                                                                                                                                                 |
| 28 | E9PXU2 | Disintegrin and metalloproteinase<br>domain-containing protein 17 | _MFSN*CSK_<br>_KCQEAIN*ATCK_                                                                                                                    |
| 29 | E9PXX8 | Protein Macc1                                                     | _NQN*ITAR_                                                                                                                                      |
| 30 | E9PYN1 | Cell adhesion molecule 1                                          | _DVTVIEGEVATISCQVN*KSD<br>DSVIQLLNPNR_<br>_VSLTN*VSISDEGR_<br>_FQLLN*FSSSELK_<br>_NLMIDIQKDTAVEGEEIEVN*                                         |



|    |        |                                                                                                |                                                                                                                                                    |
|----|--------|------------------------------------------------------------------------------------------------|----------------------------------------------------------------------------------------------------------------------------------------------------|
|    |        |                                                                                                | CTAMASKPATTIR_                                                                                                                                     |
|    |        |                                                                                                | _VDDEMPQHAVLSGPNLFINN                                                                                                                              |
|    |        |                                                                                                | LN*KTDN*GTYSR_                                                                                                                                     |
| 31 | E9PZ16 | Basement membrane-specific<br>heparan sulfate proteoglycan core<br>protein                     | _LCN*ECSDGSFHLSK_<br>_LTVPSSQN*SSFR_<br>_TDEAN*CSVK_<br>_GVN*VTMPSQPGVPPLSSTQL<br>QIDPALQEFQLVDLSR_<br>_ALVN*FTR_<br>_SLTQGSLLVGNLAPVN*GTSQ<br>GK_ |
| 32 | E9PZD8 | Ceruloplasmin                                                                                  | _EYEGAVYPDN*TTDFQR_                                                                                                                                |
| 33 | E9Q035 | Serotransferrin                                                                                | _N*STLCLDLGIPLK_                                                                                                                                   |
| 34 | E9Q414 | Apolipoprotein B-100                                                                           | _LPQQIHHYLN*ASDWER_<br>_ESMN*FSSK_                                                                                                                 |
| 35 | E9Q433 | Killer cell lectin-like receptor 2                                                             | _ALN*DSLHYLNR_                                                                                                                                     |
| 36 | E9Q4S7 | Receptor-type tyrosine-protein<br>phosphatase eta                                              | _GPDGTEGLSSTVN*GSTDPSA<br>VTDIR_<br>_LTWSNAN*GTASYR_<br>_TN*STQVSDVR_                                                                              |
| 37 | E9Q5P0 | Serine protease hepsin                                                                         | _TAGAN*GTSGFFCVDEGGLP<br>LAQR_                                                                                                                     |
| 38 | E9Q649 | Beta-1,3-galactosyl-O-glycosyl-<br>glycoprotein beta-1,6-N-<br>acetylglucosaminyltransferase 4 | _DNVN*CSGVYEHEPLEIGK_                                                                                                                              |
| 39 | E9Q6A6 | Collagen alpha-6(VI) chain                                                                     | _LGN*FSELATHN*QTFLK_<br>_DLSVFAPN*MTEIHK_<br>_VGLVTYSN*ETR_                                                                                        |
| 40 | E9Q6C2 | Complement C1s-A subcomponent                                                                  | _KITAN*STWQPKAK_                                                                                                                                   |
| 41 | E9Q6C7 | Latrophilin-2                                                                                  | _SLGQFLSTEN*ATIK_                                                                                                                                  |
| 42 | E9Q6D8 | Protein C6                                                                                     | _VLN*FTMK_                                                                                                                                         |
| 43 | E9Q8B5 | Protein Gm4788                                                                                 | _NN*STWFK_                                                                                                                                         |
| 44 | E9Q8I0 | Complement factor H                                                                            | _CIN*GTINYPTCV_<br>_DNSCVDPPHVPN*ATIVTR_                                                                                                           |

|    |        |                                                        |                                                                                                                                                      |
|----|--------|--------------------------------------------------------|------------------------------------------------------------------------------------------------------------------------------------------------------|
| 45 | E9Q9F1 | Potassium voltage-gated channel subfamily KQT member 5 | _LTEFTHN*STMDYK_<br>_WDPEPN*CTSK_<br>_IQCVDGN*WTTLPVCIEEER_<br>_SASAN*ISR_                                                                           |
| 46 | E9QJY0 | Low affinity cationic amino acid transporter 2         | _ISEEFLKN*ISASAR_                                                                                                                                    |
| 47 | E9QN70 | Laminin subunit beta-1                                 | _VN*ASTTDPNSTVEQSALTR_                                                                                                                               |
| 48 | E9QPX1 | Collagen alpha-1(XVIII) chain                          | _DGQQN*ISLLYTEPGASQTQT<br>GASFR_                                                                                                                     |
| 49 | F7BJK1 | Protein Pcdh1 (Fragment)                               | _AN*DSDQGANAIEIDYTFHQA<br>PEVVR_                                                                                                                     |
| 50 | F7BWT7 | Tetraspanin-15                                         | _N*TTDVVNTMCGYK_                                                                                                                                     |
| 51 | F8VQG4 | Protein H2-T24                                         | _QYYN*SSGTQSQR_                                                                                                                                      |
| 52 | F8VQJ3 | Laminin subunit gamma-1                                | _VN*SSLHSQISR_<br>_KYEQAKN*ISQDLEK_<br>_CDQCEENYFYN*R_<br>_VNDN*KTAAEEALR_<br>_TLAGEN*QTALEIEELNR_<br>_RIPAIN*R_<br>_LLNN*LTSIK_<br>_IASAVQKN*ATSTK_ |
| 53 | F8WIJ0 | Solute carrier family 12 member 4                      | _TVVVDN*ETVATR_                                                                                                                                      |
| 54 | F8WJ05 | Inter-alpha-trypsin inhibitor heavy chain H1           | _AN*LSSQVLK_<br>_N*LTNMSK_                                                                                                                           |
| 55 | G3UW85 | Enhancer of rudimentary homolog                        | _TYADYESVN*ECMEGVCK_                                                                                                                                 |
| 56 | G3UWA6 | 4F2 cell-surface antigen heavy chain                   | _LMNAPLYLAEWQN*ITK_                                                                                                                                  |

|    |        |                                                       |                                                                                                                                       |
|----|--------|-------------------------------------------------------|---------------------------------------------------------------------------------------------------------------------------------------|
| 57 | G3UXA6 | Polypyrimidine tract-binding protein 3                | _AQAALQAVSAVQSGN*LSLP<br>GATANEGTLLPGQSPVLR_                                                                                          |
| 58 | G3X8T3 | Lysosomal protective protein                          | _LWTSLQTHCCAQN*K_<br>_LDPPCTN*TTAPSNYLNNPYV<br>R_<br>_MYVTN*DTEVAENNYEALK<br>DFFR_                                                    |
| 59 | G3X8V6 | Oncostatin-M-specific receptor subunit beta           | _NLGPN*TTSTTITSDDFKPGV<br>R_                                                                                                          |
| 60 | G3X8X3 | Large neutral amino acids transporter small subunit 3 | _TN*TTQDEQHQTSCDQQEK<br>_                                                                                                             |
| 61 | G3X924 | Plasmalemma vesicle-associated protein                | _ADSLYSQVVGLSASQAN*LS<br>K_                                                                                                           |
| 62 | G3X925 | Pyruvate kinase                                       | _EVN*KTCEALLFK_<br>_LN*FSHGSHEYHAESIANIR_<br>_TVWVDYHN*ITQVVAVGGR_                                                                    |
| 63 | G3X943 | MCG18706, isoform CRA_b                               | _FVEQN*STGSKGN*SSR_                                                                                                                   |
| 64 | G3X973 | Stabilin-1                                            | _WQIHN*ISGK_<br>_N*SSITLPADSR_<br>_AYTIFVPTN*HSLETQGN*NS<br>VLGIDTVR_<br>_FCN*ESMGNCGSTGLAQPCH<br>SDAHCVIQEGVAR_<br>_KGCADYCN*QTITKR_ |
| 65 | G3X9D6 | Apolipoprotein N, isoform CRA_a                       | _TQN*GSLPAVTR_<br>_ASVVN*VTQHCTMESWESM<br>NEVAR_                                                                                      |
| 66 | G5E8C4 | Transmembrane and TPR repeat-containing protein 3     | _AN*ESRLEEADQLYR_                                                                                                                     |
| 67 | G5E8F8 | Integrin beta                                         | _SN*LTVLR_                                                                                                                            |
| 68 | G5E8G3 | Neurotrimin                                           | _AMDN*VTVR_                                                                                                                           |
| 69 | G5E8Q8 | MCG115189                                             | _LLQQSN*QSSQFLHSVER_<br>_MDYNSFQGTPSN*ETK_<br>_ANEQVIQNLN*HTYK_                                                                       |
| 70 | G5E8U1 | Sulfate anion transporter 1                           | _N*NDSTLN*NSATTLIIGLQD<br>CR_                                                                                                         |

|    |        |                                                                |                                                                                                                            |
|----|--------|----------------------------------------------------------------|----------------------------------------------------------------------------------------------------------------------------|
| 71 | H3BL08 | Ceramide synthase 6                                            | _FWLPHN*VTWADLK_                                                                                                           |
| 72 | J3QPG5 | Sulfated glycoprotein 1                                        | _TN*SSFIQGFVDHVKEDCDRL<br>GPGVSDICK_<br>_FSELIVNN*ATEELLVK_<br>_LVLYLEHNLEKN*STK_<br>_DN*ATQEEILHYLEK_<br>_LSQALGN*ITVVQK_ |
| 73 | K3W4M4 | ATP-dependent (S)-NAD(P)H-<br>hydrate dehydratase              | _LSQALGN*ITVVQK_                                                                                                           |
| 74 | K3W4R4 | Collagen alpha-1(XIV) chain                                    | _AIN*ASAN*ITSDGVEVLGR_<br>_VVDKGN*GSKPTSPEEVK_<br>_SFMVN*WTQSPGKVEK_                                                       |
| 75 | O08530 | Sphingosine 1-phosphate receptor 1                             | _HYN*YTGK_                                                                                                                 |
| 76 | O08532 | Voltage-dependent calcium channel<br>subunit alpha-2/delta-1   | _SFSGLLD CGN*CSR_<br>_DAVNN*ITAK_                                                                                          |
| 77 | O08603 | Retinoic acid early-inducible<br>protein 1-beta                | _TMTSGDPGETAN*ATEVKK_                                                                                                      |
| 78 | O08677 | Kininogen-1                                                    | _EGN*CSAQSGLA WQDCDFK<br>DAEEAATGECTATVGKR_<br>_IAN*FSQSCTLYSGDDLVEAL<br>PKPCPGCPR_                                        |
| 79 | O08692 | Myeloid bactenecin (F1)                                        | _DCDFLEDGEERN*CTGK_                                                                                                        |
| 80 | O08705 | Sodium/bile acid cotransporter                                 | _MEAHN*VSAPFN*FSLPPGFG<br>HR_                                                                                              |
| 81 | O08966 | Solute carrier family 22 member 1                              | _YEVDWN*QSTLDCVDPLSSL<br>AAN*R_                                                                                            |
| 82 | O09009 | Beta-1,3-N-<br>acetylglucosaminyltransferase<br>radical fringe | _MINTN*CSAVR_                                                                                                              |
| 83 | O09043 | Napsin-A                                                       | _ASSSFRPN*GTK_                                                                                                             |
| 84 | O09159 | Lysosomal alpha-mannosidase                                    | _QN*FSFCR_<br>_ELN*ISICPVSQTSER_<br>_RDDYRPTWTLN*QTEPVAGN<br>YYPVNTR_                                                      |

|    |        |                                                                |                                                                                                                                      |
|----|--------|----------------------------------------------------------------|--------------------------------------------------------------------------------------------------------------------------------------|
| 85 | O09164 | Extracellular superoxide dismutase [Cu-Zn]                     | _AN*LTWTVK_<br>_LEAYFSLEGFPAEQN*ASNR_                                                                                                |
| 86 | O35114 | Lysosome membrane protein 2                                    | _N*QSVGDPNVDLIR_<br>_TMVFPVMYLN*ESVLIDKET<br>ANQLK_<br>_TSLDWWTDDTCNMIN*GTDG<br>DSFHPLISK_<br>_NMVLQN*GTK_<br>_NKANIQFGEN*GTTISAVTNK |
| 87 | O35343 | Importin subunit alpha-4                                       | -<br>_VQN*TSLEAIVQNASSDNQGI<br>QLSAVQAAR_                                                                                            |
| 88 | O35598 | Disintegrin and metalloproteinase domain-containing protein 10 | _EGICNGFTALCPASDPKPN*F<br>TDCNR_                                                                                                     |
| 89 | O35604 | Niemann-Pick C1 protein                                        | _IN*TTSDEKDPTNPFR_<br>_TEQLIQAPN*TSVHIYEPYPA<br>GADVPPGPPLNK_<br>_LYN*VTHQFCN*ASVMDPTC<br>VR_<br>_LIASN*ITETMR_<br>_ACN*ATNWIEYMFNK_ |
| 90 | O35607 | Bone morphogenetic protein receptor type-2                     | _ISHEN*GTILCSK_                                                                                                                      |
| 91 | O35632 | Hyaluronidase-2                                                | _FDAAGTSVHGGVPQN*GSLC<br>AHLPLK_<br>_RNPSANTFLHLN*ASSFR_                                                                             |
| 90 | O35887 | Calumenin                                                      | _N*ATYGYVLDDPDDGFNY<br>K_                                                                                                            |
| 93 | O54890 | Integrin beta-3                                                | _CNNGN*GTFECGVCR_<br>_NAVN*CTYKNEDDCVVR_                                                                                             |
| 94 | O55060 | Thiopurine S-methyltransferase                                 | _EFFAEQN*LSYTEEPLAEIAG<br>AK_                                                                                                        |
| 95 | O55111 | Desmoglein-2                                                   | _YVQN*GTYTAK_                                                                                                                        |
| 96 | O55143 | Sarcoplasmic/endoplasmic reticulum calcium ATPase 2            | _TASEMVLADDN*FSTIVAAV<br>EEGR_                                                                                                       |

|     |        |                                                    |                                                                              |
|-----|--------|----------------------------------------------------|------------------------------------------------------------------------------|
| 97  | O70423 | Membrane primary amine oxidase                     | _YLYLASN*HSNK_                                                               |
| 98  | O70570 | Polymeric immunoglobulin receptor                  | _TN*QSCSELVIDSTEK_<br>_ANLINFPEN*NTFVINIEQLTQ<br>DDTGSIK_                    |
| 99  | O88325 | Alpha-N-acetylglucosaminidase                      | _SVYN*CSGEACSGHNR_<br>_LLLTAAPN*LTTSPAFR_                                    |
| 100 | O88342 | WD repeat-containing protein 1                     | _MTVN*ESEQLVSCSMDDTVR<br>-                                                   |
| 101 | O88507 | Ciliary neurotrophic factor receptor subunit alpha | _VN*GTDLAPDLLN*GSQILIR<br>-                                                  |
| 102 | O88531 | Palmitoyl-protein thioesterase 1                   | _FFN*DSIVDPVDSEWFGFYR_<br>_CVN*ESYKK_                                        |
| 103 | O88668 | Protein CREG1                                      | _VN*KTEEDYAR_<br>_VVTPEEYFN*VTLQ_                                            |
| 104 | O88783 | Coagulation factor V                               | _SN*ETALSPDLN*QTSPSMST<br>DR_                                                |
| 105 | O88792 | Junctional adhesion molecule A                     | _AFMN*SSFTIDPK_                                                              |
| 106 | O88829 | Lactosylceramide alpha-2,3-sialyltransferase       | _LNSAPVEGYSEHVGN*KTTIR<br>-                                                  |
| 107 | O89017 | Legumain                                           | _SHTN*TSHVMQYGN*K_                                                           |
| 108 | O89020 | Afamin                                             | _HVEDKFN*ETTQR_                                                              |
| 109 | O89023 | Tripeptidyl-peptidase 1                            | _SSSHLPPSSYFN*ASGR_<br>_DVGSGTTN*NSQACAQFLEQ<br>YFHNSDLTEFMR_<br>_QRYN*LTAK_ |
| 110 | P00186 | Cytochrome P450 1A2                                | _KSEEMLNIVNN*SKDFVENV<br>TSGNAVDFFPVLRL_                                     |
| 111 | P01029 | Complement C4-B                                    | _FSDGLESN*R_<br>_N*TTCQDLQIEVK_<br>_ALN*VTLSSMGRNGLK_                        |
| 112 | P01592 | Immunoglobulin J chain                             | _EN*ISDPTSPLRR_                                                              |
| 113 | P01869 | Ig gamma-1 chain C region, membrane-bound form     | _EEQFN*STFR_                                                                 |

|     |        |                                                          |                                                                       |
|-----|--------|----------------------------------------------------------|-----------------------------------------------------------------------|
| 114 | P01872 | Ig mu chain C region secreted form                       | _IMESHPN*GTFSAK_                                                      |
| 115 | P01897 | H-2 class I histocompatibility antigen, L-D alpha chain  | _TLLGYYN*QSAGGTHTLQW<br>MYGCDVGS DGR_<br>_EQN*YTCR_<br>_YLKNGN*ATLLR_ |
| 116 | P01900 | H-2 class I histocompatibility antigen, D-D alpha chain  | _YYN*QSAGGSHTLQWMAGC<br>DVESDGR_<br>_YLKNGN*ATLLR_                    |
| 117 | P01902 | H-2 class I histocompatibility antigen, K-D alpha chain  | _EQN*YTCHVHHK_<br>_YLELGN*ETLLR_                                      |
| 118 | P01921 | H-2 class II histocompatibility antigen, A-D beta chain  | _GECYYTN*GTQR_                                                        |
| 119 | P02301 | Histone H3.3C                                            | _FQSA AIGALQEASEAYLVGLF<br>EDTN*LCAIHAK_                              |
| 120 | P03953 | Complement factor D                                      | _LSQN*ASLGPHVRPLPLQYED<br>KEVEPGTLC DVAGWGVVTHA<br>GR_                |
| 121 | P03987 | Ig gamma-3 chain C region                                | _EAQYN*STFR_                                                          |
| 122 | P04228 | H-2 class II histocompatibility antigen, A-D alpha chain | _SN*FTPATNEAPQATVFPK_                                                 |
| 123 | P04939 | Major urinary protein 3                                  | _AFVEN*ITVLENSLVFK_                                                   |
| 124 | P05202 | Aspartate aminotransferase, mitochondrial                | _HFIEQGIN*VCLCQSYAK_                                                  |
| 125 | P06339 | H-2 class I histocompatibility antigen, D-37 alpha chain | _LGN*ETLQR_                                                           |
| 126 | P06683 | Complement component C9                                  | _GAGEVSPA EHSSKPTN*ISAK<br>_<br>_MSPWSN*WSECDPCLK_<br>_TDNGKTVN*ITR_  |
| 127 | P06684 | Complement C5                                            | _AFN*ECCTIANK_                                                        |
| 128 | P06797 | Cathepsin L1                                             | _YRAEFAVAN*DTGFVDIPQQ<br>EK_                                          |

|     |        |                                                                  |                                                                                                                                                                 |
|-----|--------|------------------------------------------------------------------|-----------------------------------------------------------------------------------------------------------------------------------------------------------------|
| 129 | P06802 | Ectonucleotide pyrophosphatase/phosphodiesterase family member 1 | _MN*ASFSLK_<br>_VYN*GSVPFEER_                                                                                                                                   |
| 130 | P07309 | Transthyretin                                                    | _TLGISPFHEFADVFTAN*DS<br>GHR_                                                                                                                                   |
| 131 | P07758 | Alpha-1-antitrypsin 1-1                                          | _GDHTQILEGLQFN*LTQTSE<br>ADIHK_                                                                                                                                 |
| 132 | P07759 | Serine protease inhibitor A3K                                    | _YTGN*ASALLILPDQGR_<br>_FN*LTETPEADIHQGFNLLQ<br>SLSQPEDQDQINIGNAMFIEK_<br>_NLINDYVSN*QTQGMIK_                                                                   |
| 133 | P08101 | Low affinity immunoglobulin gamma Fc region receptor II          | _ATVN*DSGEYR_<br>_YHHYSSN*FSIPK_<br>_EDTVTLTCEGTHNPGN*SSTQ<br>WFHNGR_                                                                                           |
| 134 | P08113 | Endoplasmin                                                      | _TDDEVVQREEEAIQLDGLN*<br>ASQIR_<br>_GVVDSDDLPLN*VSR_<br>_HNN*DTQHIWESDSNEFSVIA<br>DPR_<br>_LGVIEDHSN*R_                                                         |
| 135 | P08607 | C4b-binding protein                                              | _CEQEASEDLKPALTGN*K_<br>_LACLN*GTVLR_<br>_LVGSPFIGCTVVN*K_                                                                                                      |
| 136 | P09055 | Integrin beta-1                                                  | _KEN*SSEICSNNGECVCGQCV<br>CR_<br>_CHEGN*GTFECGACR_<br>_SCGECIQAGPNCGWCTN*TT<br>FLQEGMPTSAR_<br>_SYCKNGVN*GTGENGRK_<br>_KDTCAQECSHFN*LTK_<br>_NPCTSEQN*CTSPFSYK_ |
| 137 | P09242 | Alkaline phosphatase, tissue-nonspecific isozyme                 | _N*RTDVEYELDEK_<br>_CN*TTQGNEVTSILR_                                                                                                                            |
| 138 | P09470 | Angiotensin-converting enzyme                                    | _STEVSN*HTLK_                                                                                                                                                   |
| 139 | P10126 | Elongation factor 1-alpha 1                                      | _VETGVLKPGMVVTFAPVN*V<br>TTEVK_                                                                                                                                 |
| 140 | P10404 | MLV-related proviral Env polyprotein                             | _THQALCN*TTQK_                                                                                                                                                  |
| 141 | P10493 | Nidogen-1                                                        | _CVAN*YTGNGR_                                                                                                                                                   |
| 142 | P10605 | Cathepsin B                                                      | _ILRGEN*HCGIESEIVAGIPR_                                                                                                                                         |



|     |        |                                              |                                                                                                                                                                                      |
|-----|--------|----------------------------------------------|--------------------------------------------------------------------------------------------------------------------------------------------------------------------------------------|
| 143 | P11247 | Myeloperoxidase                              | _QN*TTWQAGR_<br>_SYN*DSVDPR_                                                                                                                                                         |
| 144 | P11276 | Fibronectin                                  | _RHEEGHMLN*CTCFGQGR_<br>_N*YTDCTSEGRR_<br>_LDAPTNLQFVN*ETDR_<br>_DQCIVDDITYNVN*DTFHKR_                                                                                               |
| 145 | P11438 | Lysosome-associated membrane glycoprotein 1  | _EN*VSDPSLTITFGR_<br>_YSVQHMYFTYN*LSDTEHFP<br>NAISK_<br>_DATIQAYLSSGN*FSK_<br>_LN*MTLPDALVPTFSISN*HSL<br>K_<br>_GYLLTLN*FTKN*TTR_<br>_AFNISP*DTSSGSCGINLVTL<br>K_<br>_VYMKN*VTVVLRL_ |
| 146 | P11609 | Antigen-presenting glycoprotein CD1d1        | _CLQMSSFAN*R_<br>_VLNADQGTSATVQMLLN*DT<br>CPLFVR_                                                                                                                                    |
| 147 | P11688 | Integrin alpha-5                             | _IYLRN*ESEFR_<br>_HPGN*FSSLSCDYFAVN*QSR<br>_<br>_TEKDPQNDPVGTCYLSTEN*F<br>TR_                                                                                                        |
| 148 | P11835 | Integrin beta-2                              | _LN*FTGPGEPDSLR_                                                                                                                                                                     |
| 149 | P11881 | Inositol 1,4,5-trisphosphate receptor type 1 | _VETGEN*CTSPAPK_                                                                                                                                                                     |
| 150 | P12246 | Serum amyloid P-component                    | _LIPHLEKPLQN*FTLCFR_                                                                                                                                                                 |
| 151 | P12265 | Beta-glucuronidase                           | _YGIVVIDECPGVGIVLPQSFG<br>N*ESLR_<br>_IAN*ETGGHGSQPR_<br>_ITIAIN*NLTLPHTLPPGTIVYK<br>_                                                                                               |
| 152 | P13597 | Intercellular adhesion molecule 1            | _GDHGAN*FSCR_<br>_TELDLRPQGLALFSN*VSEAR<br>_<br>_EAFLPQGGSVQVN*CSSSCK_<br>_QEMN*GTIVCHAFSSHGN*V<br>TR_<br>_LDETDCCLGN*WTWQEGSQQ<br>_                                                 |

|     |        |                                                        |                                                                                                                    |
|-----|--------|--------------------------------------------------------|--------------------------------------------------------------------------------------------------------------------|
| 153 | P14094 | Sodium/potassium-transporting ATPase subunit beta-1    | TLK_<br>_LDWLGN*CSGLNDDSYGYR_<br>_YLQPLLAVQFTN*LTVDTEIR                                                            |
| 154 | P14152 | Malate dehydrogenase, cytoplasmic                      | -<br>_NVIIWGN*HSSTQYPDVNHA<br>K_                                                                                   |
| 155 | P14211 | Calreticulin                                           | _SGTIFDNFLITNDEAYAEFEFG<br>N*ETWGVTK_                                                                              |
| 156 | P14429 | H-2 class I histocompatibility antigen, Q7 alpha chain | _TAQSYYN*QSK_                                                                                                      |
| 157 | P15116 | Cadherin-2                                             | _SN*ISILR_<br>_ILSQAPSTPSPNMFTINN*ETG<br>DIITVAAGLDR_<br>_RN*WTINR_                                                |
| 158 | P15208 | Insulin receptor                                       | _SHGCTAEGLCCHKECLGN*C<br>SEPDDPTK_<br>_TWSPPFESDDSQKHN*QSEY<br>DDSAECCSCPK_<br>_GLSPGN*YSVR_<br>_HN*LITQGK_        |
| 159 | P15209 | BDNF/NT-3 growth factors receptor                      | _ITN*ISSDDSGK_                                                                                                     |
| 160 | P16294 | Coagulation factor IX                                  | _TIPHHQYN*ATINK_                                                                                                   |
|     | P16301 | Phosphatidylcholine-sterol acyltransferase             | _IVYN*HSSGR_<br>_AELSN*HTRPVILVPGCLGNR                                                                             |
| 161 | P16406 | Glutamyl aminopeptidase                                | -<br>_GWLN*GSLVGFYK_<br>_MGDREALGN*ASQLFDSWL<br>K_<br>_YGMQNSGNEAAWN*YTLEQ<br>YQK_<br>_VNYEGGTWDWIAEALSSN*H<br>TR_ |
| 162 | P16858 | Glyceraldehyde-3-phosphate dehydrogenase               | _IVSN*ASCTTNCLAPLAK_                                                                                               |
| 163 | P17047 | Lysosome-associated membrane glycoprotein 2            | _EASHYSIHDIIVLSYN*TSDST<br>VFPGAVAK_<br>_LN*NSQIK_<br>_VPFIFNINPATTN*FTGSCQPQ                                      |

|     |        |                                               |                                                                                                                                                                                                                                                                                                            |
|-----|--------|-----------------------------------------------|------------------------------------------------------------------------------------------------------------------------------------------------------------------------------------------------------------------------------------------------------------------------------------------------------------|
|     |        |                                               | SAQLR_<br>_VQPFN*VTK_<br>_CNSVLTYN*LTPVVQK_<br>_DLGPALAN*SSHVDK_<br>_VYTYADTPNDFQLSN*FSLPE<br>EDTK_<br>_RMELSVGAIQAN*R_<br>_ITLEVFDVPKPSIEIN*KTEAS<br>TDSCHLR_<br>_YYHGELSYLN*VTRK_<br>_TQLTCSLN*SSGVDIVGHR_<br>_TSDTGEEEAITN*STEANGKY<br>VVVSTPEK_<br>_SQTISNLDVNVDPGTYVCN*<br>ATNAQGTR_<br>_VCDGN*STNPR_ |
| 164 | P17439 | Glucosylceramidase                            |                                                                                                                                                                                                                                                                                                            |
| 165 | P18181 | CD48 antigen                                  |                                                                                                                                                                                                                                                                                                            |
| 166 | P18242 | Cathepsin D                                   |                                                                                                                                                                                                                                                                                                            |
| 167 | P18572 | Basigin                                       |                                                                                                                                                                                                                                                                                                            |
| 168 | P19137 | Laminin subunit alpha-1                       |                                                                                                                                                                                                                                                                                                            |
| 169 | P19221 | Prothrombin                                   | _WVLTAAHCILYPPWDKN*FT<br>ENDLLVR_<br>_YPHKPEIN*STTHPGADLK_<br>_SLSN*STAR_<br>_LLYISAEDFSIDHSPN*STAGP<br>SCSLLQEAFR_                                                                                                                                                                                        |
| 170 | P19324 | Serpin H1                                     |                                                                                                                                                                                                                                                                                                            |
| 171 | P20060 | Beta-hexosaminidase subunit beta              |                                                                                                                                                                                                                                                                                                            |
| 172 | P21614 | Vitamin D-binding protein                     | _ICQN*LSKK_                                                                                                                                                                                                                                                                                                |
| 173 | P22272 | Interleukin-6 receptor subunit alpha          | _ALEVAN*GTVTSLPGATVTLI<br>CPGK_                                                                                                                                                                                                                                                                            |
| 174 | P23953 | Carboxylesterase 1C                           | _EGASEEETN*LSK_<br>_NIQAVNEIATLSQCN*DTSSA<br>AMVQCLR_<br>_N*ATSYPPMCSQDAGWAK_<br>_QTPEYQN*R_<br>_TLMSAEANLAGLFPNEVQH<br>FNPN*ISWQIPVHTVPITEDR_<br>_YHGFLN*TSYHR_<br>_YEQLQN*ETR_                                                                                                                           |
| 175 | P24638 | Lysosomal acid phosphatase                    |                                                                                                                                                                                                                                                                                                            |
| 176 | P24668 | Cation-dependent mannose-6-phosphate receptor | _LRPLFN*K_<br>_EASN*HSSGAGLVQINK_<br>_GSNFN*ISK_<br>_LQTPLN*YTEFQKPICLPSK_                                                                                                                                                                                                                                 |
| 177 | P26262 | Plasma kallikrein                             |                                                                                                                                                                                                                                                                                                            |

|     |        |                                               |                                                                                                                                                                               |
|-----|--------|-----------------------------------------------|-------------------------------------------------------------------------------------------------------------------------------------------------------------------------------|
| 178 | P26618 | Platelet-derived growth factor receptor alpha | _NN*LSVVAR_                                                                                                                                                                   |
| 179 | P26928 | Hepatocyte growth factor-like protein         | _GTTN*TTSAGVPCQR_                                                                                                                                                             |
| 180 | P27046 | Alpha-mannosidase 2                           | _DSVIN*LSESVEDGPR_<br>_GSPGN*ASQGSIIHLHSPQLAL<br>QADPR_                                                                                                                       |
| 181 | P27773 | Protein disulfide-isomerase A3                | _VDCTANTN*TCNK_                                                                                                                                                               |
| 182 | P28653 | Biglycan                                      | _MIEN*GSLSFPLTLR_<br>_LLQVVYLHSNN*ITK_                                                                                                                                        |
| 183 | P28654 | Decorin                                       | _YIQVVYLHNNN*ISAVGQND<br>FCR_<br>_LGLSFNSITVMEN*GSLANVP<br>HLR_<br>_ISDTN*ITAIPQGLPTSLTEVH<br>LDGNKITK_                                                                       |
| 184 | P28665 | Murinoglobulin-1                              | _EVNSQLDNN*GCSTQEVN*IT<br>ELQSK_<br>_TIEQERN*ASFVYTK_<br>_SLDEEAIKEN*NSIHWK_<br>_SLGNVN*FSVSAEAQQSSEPC<br>GSEVATVPETGRK_<br>_YLN*ETQQLTQK_<br>_ICLHLYQLN*ETVTVTASLVS<br>QSGR_ |
| 185 | P28666 | Murinoglobulin-2                              | _EVNSKLDNN*GCSTQEVN*IT<br>ELQSK_                                                                                                                                              |
| 186 | P28843 | Dipeptidyl peptidase 4                        | _QLITEEKIPN*NTQWITWSPE<br>GHK_<br>_LDFIVLN*ETR_<br>_N*STVMSR_                                                                                                                 |
| 187 | P29416 | Beta-hexosaminidase subunit alpha             | _SAEGTFFIN*K_                                                                                                                                                                 |
| 188 | P29533 | Vascular cell adhesion protein 1              | _N*TTISVHPSTR_                                                                                                                                                                |
| 189 | P29699 | Alpha-2-HS-glycoprotein                       | _RPFVVYEMEVDLTLETCHA<br>LDPTPLAN*CSVR_                                                                                                                                        |

|     |          |                                                                              |                                                                                                        |
|-----|----------|------------------------------------------------------------------------------|--------------------------------------------------------------------------------------------------------|
|     |          |                                                                              | _CPLLTPFN*DTNVVHTVNTA<br>LAAFNTQNN*GTYFK_<br>_ALN*SSTEDGIKR_                                           |
| 190 | P29754   | Type-1A angiotensin II receptor                                              |                                                                                                        |
| 191 | P29788   | Vitronectin                                                                  | _N*NTNTGVQPENTSPPGDLNP<br>R_                                                                           |
| 192 | P30204   | Macrophage scavenger receptor<br>types I and II                              | _FQN*FSMATDQR_<br>_VLNN*ITNDLR_                                                                        |
| 193 | P31428   | Dipeptidase 1                                                                | _RN*WTETEVR_                                                                                           |
| 194 | P31809   | Carcinoembryonic antigen-related<br>cell adhesion molecule 1                 | _MTLSQN*NSILR_<br>_GN*TTAIDKEIAR_<br>_TLTLLN*VTRN*DTGPYVCET<br>R_<br>_TTVKN*ITVLEPVTQPFLQVT<br>N*TTVK_ |
| 195 | P31809-3 | Isoform 3 of Carcinoembryonic<br>antigen-related cell adhesion<br>molecule 1 | _FHVHQPVTQPFLQVTN*TTV<br>K_                                                                            |
| 196 | P31996   | Macrosialin                                                                  | _KAWGISVLNPN*KTK_                                                                                      |
| 197 | P32020   | Non-specific lipid-transfer protein                                          | _HSVN*NTYSQFQDEYSLEEV<br>MK_                                                                           |
| 198 | P32261   | Antithrombin-III                                                             | _SLTFN*ESYQDVSEVVYGAK<br>_<br>_VTINNWVAN*KTEGR_<br>_LGACN*DTLK_                                        |
| 199 | P32507   | Poliovirus receptor-related protein<br>2                                     | _MVN*TTFICTATNAVGTGR_                                                                                  |
| 200 | P33587   | Vitamin K-dependent protein C                                                | _IVN*GTLTK_<br>_EILVHPN*YTR_                                                                           |
| 201 | P34927   | Asialoglycoprotein receptor 1                                                | _SLSCQMAAFRGN*GSER_<br>_QN*FSN*LTVSTEDQVK_                                                             |
| 202 | P35492   | Histidine ammonia-lyase                                                      | _EGLALIN*GTQMITSLGCEAL<br>ER_                                                                          |
| 203 | P35762   | CD81 antigen                                                                 | _TFHETLN*CCGSNALTTLTTT<br>ILR_                                                                         |
| 204 | P35917   | Vascular endothelial growth factor<br>receptor 3                             | _ADN*YTYEHLR_                                                                                          |

|     |        |                                                                  |                                                                                                                       |
|-----|--------|------------------------------------------------------------------|-----------------------------------------------------------------------------------------------------------------------|
| 205 | P35918 | Vascular endothelial growth factor receptor 2                    | _VVGND*DTGAYK_                                                                                                        |
| 206 | P36552 | Coproporphyrinogen-III oxidase, mitochondrial                    | _AGVSISVVHGN*LSEEAANQ<br>MR_                                                                                          |
| 207 | P38647 | Stress-70 protein, mitochondrial                                 | _GAVVGIDLGTTN*SCVAVME<br>GK_                                                                                          |
| 208 | P40237 | CD82 antigen                                                     | _EMGNTVMDIIRN*YTAN*AT<br>SSR_<br>_CCGWVSHYN*WTENEELMG<br>FTK_<br>_NYTAN*ATSSR_<br>_KGFCEADN*STVSENNPEDW<br>PVNTEGCMK_ |
| 209 | P41233 | ATP-binding cassette sub-family A member 1                       | _YPTPGEAPGVVGNFN*K_<br>_EAFN*ETNQAIQTISR_                                                                             |
| 210 | P41593 | Parathyroid hormone/parathyroid hormone-related peptide receptor | _FMTN*ETR_                                                                                                            |
| 211 | P42703 | Leukemia inhibitory factor receptor                              | _LKN*ITDISQK_<br>_KVPSN*STETVIESDQFQPGV<br>R_<br>_LGVQMHPGQEIHN*FTLTGR_<br>_GSALPHPSN*ATWEIK_<br>_IEGLTN*ETYR_        |
| 212 | P43006 | Excitatory amino acid transporter 2                              | _VLVAPPSEEAN*TTK_<br>_AVISMLN*ETMNEAPEETK_                                                                            |
| 212 | P43277 | Histone H1.3                                                     | _ALAAAGYDVEKN*NSR_                                                                                                    |
| 213 | P43406 | Integrin alpha-V                                                 | _TAADATGLQPILNQFTPAN*V<br>SR_<br>_AN*TTQPGIVEGGQVLK_<br>_LSCAFKTEN*QTR_                                               |
| 214 | P45700 | Mannosyl-oligosaccharide 1,2-alpha-mannosidase IA                | _TCHESYN*R_                                                                                                           |
| 215 | P46978 | Dolichyl-diphosphooligosaccharide--protein                       | _VMSWWDYGYQITAMAN*R_<br>_TILVDN*NTWN*NTHISR_                                                                          |

|     |        |                                                                         |                                                                                                        |
|-----|--------|-------------------------------------------------------------------------|--------------------------------------------------------------------------------------------------------|
|     |        | glycosyltransferase subunit STT3A                                       |                                                                                                        |
| 216 | P49182 | Heparin cofactor 2                                                      | _NGN*MSGISDQR_<br>_DFVN*ASSK_                                                                          |
| 218 | P50172 | Corticosteroid 11-beta-dehydrogenase isozyme 1                          | _QSN*GSIAVISSLAGK_                                                                                     |
| 219 | P50427 | Steryl-sulfatase                                                        | _WHN*GSAVWK_                                                                                           |
| 220 | P50429 | Arylsulfatase B                                                         | _IYAGMVSLMDEAVGN*VTK_                                                                                  |
| 221 | P50608 | Fibromodulin                                                            | _LYLDHNN*LTR_                                                                                          |
| 222 | P51660 | Peroxisomal multifunctional enzyme type 2                               | _ICDFSN*ASKPQTIQESTGGIV<br>EVLHK_                                                                      |
| 223 | P51830 | Adenylate cyclase type 9                                                | _NPCN*SSVLQDGR_                                                                                        |
| 224 | P51885 | Lumican                                                                 | _LGSFDGLVN*LTFIYLQHNQL<br>K_                                                                           |
| 225 | P52430 | Serum paraoxonase/arylesterase 1                                        | _HAN*WLTPLK_<br>_ITVVYAEN*GTVLQGTTVAS<br>VYK_                                                          |
| 226 | P52592 | Sphingosine 1-phosphate receptor 2                                      | _VLEHYN*YTK_                                                                                           |
| 227 | P52793 | Ephrin-A1                                                               | _HIVFWN*SSNPK_                                                                                         |
| 228 | P54751 | CMP-N-acetylneuraminic-beta-galactosamide-alpha-2,3-sialyltransferase 1 | _KPNN*LSDTVK_<br>_TGVHDGDFEYN*ITTTLAAIN<br>K_                                                          |
| 229 | P55065 | Phospholipid transfer protein                                           | _IKVSN*VSCEASVSK_                                                                                      |
| 230 | P55292 | Desmocollin-2                                                           | _AN*YTILK_                                                                                             |
| 231 | P55302 | Alpha-2-macroglobulin receptor-associated protein                       | _VIDLWDLAQSAN*FTEK_                                                                                    |
| 232 | P56528 | ADP-ribosyl cyclase 1                                                   | _N*PCNITREDYAPLVK_<br>_LVTQTIPCN*K_                                                                    |
| 233 | P57716 | Nicastrin                                                               | _TSLDLWMHTDPMSQKN*ESV<br>K_<br>_AN*NSWFQSILK_<br>_KIYIPLN*K_<br>_LLN*ATHQIGCQSSISGDTGVI<br>HVVEKEEDLK_ |

|     |        |                                                                        |                                                                                                                                |
|-----|--------|------------------------------------------------------------------------|--------------------------------------------------------------------------------------------------------------------------------|
| 234 | P57757 | Cystinosin                                                             | _SKN*LTIVELPDEVIVPR_                                                                                                           |
| 235 | P62702 | 40S ribosomal protein S4, X isoform                                    | _FDTGN*LCMVTGGANLGR_                                                                                                           |
| 236 | P63028 | Translationally-controlled tumor protein                               | _TEGAIDDSLIGGN*ASAEGPE<br>GEGTESTVVTGVDIVMNHHL<br>QETSFTK_                                                                     |
| 237 | P63038 | 60 kDa heat shock protein, mitochondrial                               | _LVQDVAN*NTNEEAGDGTTT<br>ATVLAR_                                                                                               |
| 238 | P68373 | Tubulin alpha-1C chain                                                 | _AYHEQLTVAEITN*ACFEPAN<br>QMVK_                                                                                                |
| 239 | P70194 | C-type lectin domain family 4 member F                                 | _SSTEN*TSAELHVLGR_<br>_GSLQSANDLSSQTQGFLQHS<br>MDN*ISAIQTVR_<br>_GSN*NSGHDN*HSQFVR_<br>_LRDYEEN*SSSCHK_<br>_CGNCN*LTSLEDEDFCK_ |
| 240 | P70274 | Selenoprotein P                                                        | _CGNCN*LTSLEDEDFCK_                                                                                                            |
| 241 | P70302 | Stromal interaction molecule 1                                         | _LAVTN*TTMTGTVLK_                                                                                                              |
| 242 | P70387 | Hereditary hemochromatosis protein homolog                             | _CQALDFFPQN*ITMR_                                                                                                              |
| 243 | P70389 | Insulin-like growth factor-binding protein complex acid labile subunit | _N*NSLQTFVPQPGLER_<br>_N*LTQLPDGIPVSTR_                                                                                        |
| 244 | P70665 | Sialate O-acetyltransferase                                            | _AVAYGEKN*LTFQGPLPK_                                                                                                           |
| 245 | P70699 | Lysosomal alpha-glucosidase                                            | _LEN*LSSTESGYTATLTR_<br>_GVFITN*ETGQPLIGK_                                                                                     |
| 246 | P80313 | T-complex protein 1 subunit eta                                        | _EGTDSSQGIPQLVSN*ISACQ<br>VIAEAVR_                                                                                             |
| 247 | P97300 | Neuroplastin                                                           | _KKENGVFEEISN*SSGR_<br>_KN*ASNMEYR_<br>_AN*ATIEVK_                                                                             |
| 248 | P97328 | Ketohexokinase                                                         | _GVDVSQVTWQSQGDTPCSC<br>CIVN*NSN*GSR_                                                                                          |
| 249 | P97333 | Neuropilin-1                                                           | _IAYSNN*GSDWK_<br>_RGPECSQN*YTAPTGVK_                                                                                          |
| 250 | P97370 | Sodium/potassium-transporting ATPase subunit beta-3                    | _IIDLIPDGYPQISCLPKEEN*AT<br>IATYPEFGVLDLK_                                                                                     |



|     |        |                                                      |                                                                                                                                                                                                               |
|-----|--------|------------------------------------------------------|---------------------------------------------------------------------------------------------------------------------------------------------------------------------------------------------------------------|
| 251 | P97449 | Aminopeptidase N                                     | _LVEDLESFLKPYSVEEQKN*L<br>TSCPDGAPFIQHGPDYR_<br>_SGQEDHYWLDVEKN*QSAK_<br>_NPNN*NTIHPNLR_<br>_KLN*YTLK_<br>_N*ATLVNEADKLR_<br>_SN*VTRPSEFNWIWIPIFLK<br>_<br>_FTCN*QTTDVIIIHSK_<br>_QQCLEEAQLEN*ETTGCSK_        |
| 252 | P97751 | Vasoactive intestinal polypeptide receptor 1         |                                                                                                                                                                                                               |
| 253 | P97821 | Dipeptidyl peptidase 1                               | _SDIN*CSVMEATEEK_                                                                                                                                                                                             |
| 254 | P97927 | Laminin subunit alpha-4                              | _RPASN*ISASIQR_                                                                                                                                                                                               |
| 255 | P97927 |                                                      | _HVTDMN*STIHLR_                                                                                                                                                                                               |
| 256 | P98063 | Bone morphogenetic protein 1                         | _AAGN*SSALGGQGTSQGQQR<br>_                                                                                                                                                                                    |
| 257 | P98064 | Isoform 2 of Mannan-binding lectin serine protease 1 | _DKSGAVN*SSAAR_                                                                                                                                                                                               |
| 258 | P98064 | Mannan-binding lectin serine protease 1              | _FGYILHTDN*R_<br>_NN*LTTYK_                                                                                                                                                                                   |
| 259 | P98086 | Complement C1q subcomponent subunit A                | _VLTNQESPYQN*HTGR_                                                                                                                                                                                            |
| 260 | P99026 | Proteasome subunit beta type-4                       | _VN*DSTMLGASGDYADFQYL<br>K_                                                                                                                                                                                   |
| 261 | Q00560 | Interleukin-6 receptor subunit beta                  | _GSN*FTAICVLK_<br>_EQVTVIN*R_                                                                                                                                                                                 |
| 262 | Q01279 | Epidermal growth factor receptor                     | _YADANN*VCHLCHAN*CTY<br>GCAGPGLQGCEVWPSGPK_<br>_CDPSCP*N*GSCWGGGEENCQ<br>K_<br>_DIVQNVFMSN*MSMDLQSH<br>SSCPK_<br>_DCVSCQN*VSR_<br>_EFVENSECIQCHPECLPQAMN<br>*ITCTGR_<br>_TCPAGIMGEN*NTLVWK_<br>_DTLSIN*ATNIK_ |

|     |        |                                                               |                                                                                                                                                                                                                               |
|-----|--------|---------------------------------------------------------------|-------------------------------------------------------------------------------------------------------------------------------------------------------------------------------------------------------------------------------|
| 263 | Q01339 | Beta-2-glycoprotein 1                                         | _YTSFEYPKN*ISFACNPGFFLN<br>*GTSSSK_<br>_DYRPSAGN*NSLYQDTVVFK<br>_<br>_CLPHFAMIGN*DTVMCTEQG<br>N*WTRLPECLEVK_                                                                                                                  |
| 264 | Q02788 | Collagen alpha-2(VI) chain                                    | _N*MTLFSDLVAEK_<br>_RGTFTDCALAN*MTQQIR_<br>_MALLQYGSQNQQQVAFPLT<br>YN*VTTIHEALER_<br>_TASVSIN*QTEPPK_                                                                                                                         |
| 265 | Q03145 | Ephrin type-A receptor 2                                      | _DN*DSLITRK_                                                                                                                                                                                                                  |
| 266 | Q03311 | Cholinesterase                                                | _ETFLLN*TTCVK_                                                                                                                                                                                                                |
| 267 | Q04592 | Proprotein convertase<br>subtilisin/kexin type 5              |                                                                                                                                                                                                                               |
| 268 | Q04857 | Collagen alpha-1(VI) chain                                    | _RN*FTAADWGHSR_<br>_ENYAELLDDGFLKN*ITAQIC<br>IDKK_                                                                                                                                                                            |
| 269 | Q05685 | Folate receptor beta                                          | _NACCSVN*TSQELHK_                                                                                                                                                                                                             |
| 270 | Q06770 | Corticosteroid-binding globulin                               | _DLFTN*QSDFADTTK_<br>_GSTQYLENLGFN*MSK_<br>_VPMMVQSGN*ISYFR_<br>_QELN*DSLQVAER_<br>_RN*STGCLK_<br>_AFPEVCN*ETMMALWEECKP<br>CLK_                                                                                               |
| 271 | Q06890 | Clusterin                                                     |                                                                                                                                                                                                                               |
| 272 | Q07113 | Cation-independent mannose-6-<br>phosphate receptor           | _LSYKDQVLQLVYEN*GSPCP<br>SLSDLR_<br>_AGIN*ASYSEK_<br>_MN*YTGGDTCHK_<br>_HQN*QTLR_<br>_AACAVRPQEVTMVN*GTLTN<br>PVTGK_<br>_ISTN*ITLVCKPGDLESAPVLR<br>_<br>_SLLEFN*TTMGCQPSDSQHR_<br>_IGCFALSEPGN*GSDAGAAST<br>TAREEGDSWVLN*GTK_ |
| 273 | Q07417 | Short-chain specific acyl-CoA<br>dehydrogenase, mitochondrial |                                                                                                                                                                                                                               |

|     |        |                                                      |                                                                                                                                 |
|-----|--------|------------------------------------------------------|---------------------------------------------------------------------------------------------------------------------------------|
| 274 | Q07456 | Protein AMBP                                         | _KEDSCQLN*YSEGPCLGMQE<br>R_                                                                                                     |
| 275 | Q07797 | Galectin-3-binding protein                           | _APIPTALDTN*SSK_<br>_GLN*LTEDTYKPR_<br>_ALGYEN*ATQALGR_                                                                         |
| 276 | Q07968 | Coagulation factor XIII B chain                      | _TYEN*GSSVEYR_<br>_KEQETCLAPELEHGN*YSTTQ<br>R_                                                                                  |
| 277 | Q08857 | Platelet glycoprotein 4                              | _VISNN*CTSYGVLDIGK_<br>_QFWIFDVQNPDDVAKN*SSK<br>_<br>_VFNGKDN*ISK_<br>_RPYIVPILWLN*ETGTIGDEK_<br>_SVQTNVQVQ*QGSSSQNTTTP<br>TTK_ |
| 278 | Q0GNC1 | Inverted formin-2                                    | _LLPAFN*TTSGLPYPR_                                                                                                              |
| 279 | Q2HXL6 | ER degradation-enhancing alpha-mannosidase-like 3    |                                                                                                                                 |
| 280 | Q2VLH6 | Scavenger receptor cysteine-rich type 1 protein M130 | _LAGGENN*CSGR_<br>_LTNEAHKEN*CTGR_                                                                                              |
| 281 | Q3T9X0 | Protein Slc2a9                                       | _AFYN*GTWYR_                                                                                                                    |
| 282 | Q3TAS6 | UPF0510 protein INM02                                | _GSEVEDEDLELFN*TSVQLRP<br>PSTAPGPETAAFIER_                                                                                      |
| 283 | Q3TCN2 | Putative phospholipase B-like 2                      | _SDLNPAN*GSYPFQALHQR_<br>_LEDGFHPDAVAWAN*LTNAI<br>R_                                                                            |
| 284 |        |                                                      | _AMSSN*ETAAYK_<br>_VMSWWDYGYQIAGMAN*R_<br>_TTLVDN*NTWN*NSHIALVG<br>K_                                                           |
| 285 | Q3TQC7 | Ectonucleoside triphosphate diphosphohydrolase 5     | _GYLTSFEMFN*STFK_                                                                                                               |
| 286 | Q3TQN1 | Protein-tyrosine sulfotransferase 2                  | _LGYDPYANPPNYGNPDPIVIN<br>*NTHR_                                                                                                |
| 287 | Q3U9N4 | Granulins                                            | _VGNVECGEGHFCHDN*QTCC<br>K_<br>_CPTN*NTCCK_                                                                                     |

|     |        |                                                            |                                                                                                                                                                                                                                             |
|-----|--------|------------------------------------------------------------|---------------------------------------------------------------------------------------------------------------------------------------------------------------------------------------------------------------------------------------------|
| 288 | Q3UDW8 | Heparan-alpha-glucosaminide N-acetyltransferase            | _FGEFGN*YSLLVQHASSGAN<br>K_                                                                                                                                                                                                                 |
| 289 | Q3UMW8 | Ceroid-lipofuscinosis neuronal protein 5 homolog           | _KIETN*YTK_<br>_IFLYSGEPIYLG*ETSIFGPK_                                                                                                                                                                                                      |
| 290 | Q3UP75 | UDP-glucuronosyltransferase 3A1                            | _KEN*SSYQVINWR_                                                                                                                                                                                                                             |
| 291 | Q3UQ28 | Peroxidasin homolog                                        | _ILCDNSDN*ITR_                                                                                                                                                                                                                              |
| 292 | Q3UUQ7 | GPI inositol-deacylase                                     | _LHVAQPEN*DSHVALLK_                                                                                                                                                                                                                         |
| 293 | Q3V1K7 | Solute carrier organic anion transporter family member 2B1 | _SQVFYTN*CSCVAGN*GTVP<br>AGSCESACSR_                                                                                                                                                                                                        |
| 294 | Q3V3R4 | Integrin alpha-1                                           | _GELQSEN*SSLTLSSNR_<br>_DSCESNQN*ITCR_<br>_VTLDFN*LTPENGPVLDDA<br>LPNSVHGHIPFAK_<br>_LDLPVN*TSIPN*VTEIK_<br>_EN*MTFGSTLVTNPK_<br>_ANQIVIPHN*TTFQTEPTK_<br>_YN*HTGQVVIYK_<br>_QTQVGIVQYGAN*VTHEFNL<br>NK_<br>_AHFSSLN*LTIR_<br>_VYVYAVN*QTR_ |
| 295 | Q4KL18 | Transmembrane protein 171                                  | _KN*NLSSSR_                                                                                                                                                                                                                                 |
| 296 | Q4PZA2 | Endothelin-converting enzyme 1                             | _N*SSVEAFK_<br>_QQTECMVQQYSN*YSVNGEP<br>VNGR_<br>_FFN*FSWR_<br>_HLLN*ATASVSEAERK_<br>_QVSTLIN*NTDK_<br>_DYYLN*KTENEK_<br>_LGGWN*ITGPWAK_<br>_LLGGGDEDAIRPQMQQILDF<br>ETALAN*ITIPQEK_<br>_ACMN*ETRIEELR_                                     |

|     |        |                                                               |                                                                                                                    |
|-----|--------|---------------------------------------------------------------|--------------------------------------------------------------------------------------------------------------------|
| 297 | Q571E4 | N-acetylgalactosamine-6-sulfatase                             | _TGEAN*LTQLYTQEALDFIQT<br>QHAR_                                                                                    |
| 298 | Q59IW6 | Protein Abi3bp                                                | _QVIQN*VTHR_                                                                                                       |
| 299 | Q5F2E7 | Nuclear fragile X mental<br>retardation-interacting protein 2 | _TVQN*SSVSPSSSSSSSTGET<br>QTQSSSR_                                                                                 |
| 300 | Q5FWI3 | Transmembrane protein 2                                       | _TTN*ASASDPR_<br>_VLENEKFDTHEYHN*ESR_<br>_GDPSIISVN*GTDFTFR_<br>_HPNCVN*VTK_                                       |
| 301 | Q5PT54 | Sodium/bile acid cotransporter 5                              | _VLQVVN*VTK_                                                                                                       |
| 302 | Q5SUF2 | Luc7-like protein 3                                           | _ESDTKNEVN*GTSEDIKSEGD<br>TQSN_                                                                                    |
| 303 | Q5U431 | G-protein coupled receptor 39                                 | _GLNCN*LSR_                                                                                                        |
| 304 | Q60590 | Alpha-1-acid glycoprotein 1                                   | _ESQTIGDQCVYN*STHLGFQR<br>-                                                                                        |
| 305 | Q60675 | Laminin subunit alpha-2                                       | _ICNQN*SSNPYQR_                                                                                                    |
| 306 | Q60709 | Amyloid-like protein 2                                        | _RN*QSLSLLYK_                                                                                                      |
| 307 | Q60738 | Zinc transporter 1                                            | _SSVEIIN*STQAPMR_                                                                                                  |
| 308 | Q60805 | Tyrosine-protein kinase Mer                                   | _SDN*GSYFCK_<br>_QPESVN*VTR_                                                                                       |
| 309 | Q60932 | Voltage-dependent anion-selective<br>channel protein 1        | _TKSENGLEFTSSGSANTETTK<br>VN*GSLETK_                                                                               |
| 310 | Q61001 | Laminin subunit alpha-5                                       | _QLLAN*SSALEETILGHQGR_<br>_LN*ASIADLQSK_<br>_VFDLHQNMGSVN*VSVGCTP<br>AQLIETSR_<br>_QELSQDN*ATLK_<br>_EALNQAVN*TTR_ |

|     |        |                                                                    |                                                                                                                                                                                                                     |
|-----|--------|--------------------------------------------------------------------|---------------------------------------------------------------------------------------------------------------------------------------------------------------------------------------------------------------------|
| 311 | Q61009 | Scavenger receptor class B member 1                                | _LN*VTSPDLFR_<br>_LTYN*ESR_<br>_ESGIQN*VSTCR_<br>_EHSFLFDIHPVTGIPMN*CSV<br>K_<br>_FTAPDTLAFAN*GSVYPPNEGF<br>CPCR_                                                                                                   |
| 312 | Q61029 | Lamina-associated polypeptide 2, isoforms beta/delta/epsilon/gamma | _ASSN*ESLVANR_                                                                                                                                                                                                      |
| 313 | Q61129 | Complement factor I                                                | _FN*VSLIYGR_<br>_WGEVDLIGN*CSQFYPPDRYY<br>EK_<br>_FSHN*GTCAAEGK_<br>_AQAALDKAN*ASR_                                                                                                                                 |
| 314 | Q61292 | Laminin subunit beta-2                                             |                                                                                                                                                                                                                     |
| 315 | Q61391 | Neprilysin                                                         | _SCIN*ESAIDSR_<br>_EIAN*ATTKPEDR_                                                                                                                                                                                   |
| 316 | Q61469 | Lipid phosphate phosphohydrolase 1                                 | _IN*CSDGYIEDYICQGNEEK_                                                                                                                                                                                              |
| 317 | Q61490 | CD166 antigen                                                      | _TVNSLN*VSAISIPEHDEADDI<br>SDENR_<br>_N*ATGDYK_<br>_LSLSEN*YTLSIANAK_<br>_IIISPEEN*VTLTCTAENQLER_<br>_DSYPDGN*ITWYRNGK_<br>_VEFDDKGNVITSYGNPILLN*<br>SSIPEDATIK_<br>_LDN*YSTQELGR_<br>_NVALVAGDTGN*ATGLGEQ<br>GPTR_ |
| 318 | Q61503 | 5'-nucleotidase                                                    |                                                                                                                                                                                                                     |
| 319 | Q61508 | Extracellular matrix protein 1                                     |                                                                                                                                                                                                                     |
| 320 | Q61526 | Receptor tyrosine-protein kinase erbB-3                            | _HFN*DSGACVPR_<br>_YQTVDSSNIDGFVN*CTK_                                                                                                                                                                              |
| 321 | Q61543 | Golgi apparatus protein 1                                          | _GN*ITEYQCHQYITK_<br>_LN*LTTDPK_                                                                                                                                                                                    |

|     |        |                                                               |                                                                                                                        |
|-----|--------|---------------------------------------------------------------|------------------------------------------------------------------------------------------------------------------------|
| 322 | Q61549 | EGF-like module-containing mucin-like hormone receptor-like 1 | _VINEECKEN*ESINLAAR_                                                                                                   |
| 323 | Q61606 | Glucagon receptor                                             | _LYSDQCHHN*LSELLPPPELV<br>CN*R_                                                                                        |
| 324 | Q61614 | Endothelin-1 receptor                                         | _TCMLN*ATSK_                                                                                                           |
| 325 | Q61646 | Haptoglobin                                                   | _NLFLN*HSETASAK_<br>_VVLHPN*HSVVDIGLIK_<br>_N*LTSPVGVQPILNEHTFCAG<br>LTK_<br>_CVVHYEN*STVPEKK_<br>_GDEKEN*ITAEALDLSLK_ |
| 326 | Q61704 | Inter-alpha-trypsin inhibitor heavy chain H3                  |                                                                                                                        |
| 327 | Q61735 | Leukocyte surface antigen CD47                                | _DAMVGN*YTCEVTELSR_<br>_SYIFIYDGNKN*STTTDQN*FT<br>SAK_                                                                 |
| 328 | Q61739 | Integrin alpha-6                                              | _YQTLN*CSVNVR_                                                                                                         |
| 329 | Q61830 | Macrophage mannose receptor 1                                 | _TSYCN*ESFYFLCK_<br>_WECKN*DTLFGIK_                                                                                    |
| 330 | Q62000 | Mimecan                                                       | _VIHLQFNSSSLTDDTFCKAN*<br>DTR_                                                                                         |
| 331 | Q62009 | Periostin                                                     | _GVN*ETLLVNELK_                                                                                                        |
| 332 | Q62086 | Serum paraoxonase/arylesterase 2                              | _IQNILSEKPSVTTVYINN*GSV<br>LQGSSVATIYDRK_<br>_QPNMN*LTQLK_                                                             |
| 333 | Q62087 | Serum paraoxonase/lactonase 3                                 | _VSTLYANN*GSVLQGSTVAS<br>VYHK_<br>_VIQLGTLVDN*LTVDPATGDI<br>LAGCHPNPMK_                                                |
| 334 | Q62192 | CD180 antigen                                                 | _LIN*LTFLDLTR_                                                                                                         |
| 335 | Q62313 | Trans-Golgi network integral membrane protein 1               | _TDAELN*ETARPLSPVNPK_                                                                                                  |
| 336 | Q62351 | Transferrin receptor protein 1                                | _QKN*ITAFN*ETLFR_                                                                                                      |

|     |        |                                                                  |                                                                                                          |
|-----|--------|------------------------------------------------------------------|----------------------------------------------------------------------------------------------------------|
| 337 | Q62470 | Integrin alpha-3                                                 | _VWN*STFIEDYKDFDR_<br>_DLAVGDDYTN*R_<br>_TSIPTINMEN*K_                                                   |
| 338 | Q63836 | Selenium-binding protein 2                                       | _CN*VSNTHSHCLASGEVMV<br>NTLGDLQGNGK_                                                                     |
| 339 | Q63880 | Carboxylesterase 3A                                              | _PLLAHMQLPPEIMPTVIDEYL<br>DN*GSDESATR_<br>_NVN*ISYTVN*DSFFPQRPQK<br>_<br>_KNVN*ISYTVNDSFFPQRPQK<br>_     |
| 340 | Q63886 | UDP-glucuronosyltransferase 1-1                                  | _KFPVPFQKEN*VTATLVELGR<br>_                                                                              |
| 341 | Q63961 | Endoglin                                                         | _KLN*ASIVTSFVELPLVSN*VS<br>LR_<br>_VN*ITVLPSTSR_<br>_N*TTSAAMVHCLR_<br>_N*ATSYPPMCQDPVTGQIV<br>NDLLTNRK_ |
| 342 | Q64176 | Carboxylesterase 1E                                              | _N*TTSAAMVHCLR_<br>_N*ATSYPPMCQDPVTGQIV<br>NDLLTNRK_                                                     |
| 343 | Q64449 | C-type mannose receptor 2                                        | _ASN*ASKPGTLER_<br>_VTPVCN*ASLPAQR_<br>_KVEVEAVN*ATAVK_                                                  |
| 344 | Q64487 | Receptor-type tyrosine-protein phosphatase delta                 | _KVEVEAVN*ATAVK_                                                                                         |
| 345 | Q64695 | Endothelial protein C receptor                                   | _QLNAYN*R_                                                                                               |
| 346 | Q64726 | Zinc-alpha-2-glycoprotein                                        | _DTTGSHTFQGMFGCEITNN*R<br>_                                                                              |
| 347 | Q64735 | Complement component receptor 1-like protein                     | _CTPPPYVENAVMLSEN*R_<br>_IN*YTCNQGYR_<br>_YN*VTSFK_                                                      |
| 348 | Q69ZQ1 | Uncharacterized family 31 glucosidase KIAA1161                   | _YN*VTSFK_                                                                                               |
| 349 | Q6DYE8 | Ectonucleotide pyrophosphatase/phosphodiesterase family member 3 | _LN*LSEGEVAATVK_                                                                                         |



|     |        |                                                                       |                                                                            |
|-----|--------|-----------------------------------------------------------------------|----------------------------------------------------------------------------|
| 350 | Q6GQT6 | Sterol regulatory element-binding protein cleavage-activating protein | _LPEN*QTLPGELPEHAGPAEG<br>VHDSR_                                           |
| 351 | Q6GQT9 | Nodal modulator 1                                                     | _VTNSNANAAGPLIVAGYN*V<br>SGSVR_                                            |
| 352 | Q6P5F7 | Protein tweety homolog 3                                              | _VWDTAAALN*R_                                                              |
| 353 | Q6P6J9 | Thioredoxin domain-containing protein 15                              | _ENLFGQLQGAGGFQDREEEYY<br>AEPGVTEAEPVATEDAN*STD<br>SLK_<br>_IFIFN*QTGIEAK_ |
| 354 | Q6P9J9 | Anoctamin-6                                                           | _LN*ITCESSK_<br>_NTDKENPYIGLGN*YTLCR_                                      |
| 355 | Q6PD26 | GPI transamidase component PIG-S                                      | _IYN*ASELPVRVEVDMVR_                                                       |
| 356 | Q6PEM8 | Proton-coupled folate transporter                                     | _FSTELGYN*GTR_                                                             |
| 357 | Q6PGD0 | Apoptosis-related protein 3                                           | _GFTQLQTLILPQDVPCPGGSN<br>AWDN*VTSFK_                                      |
| 358 | Q6XLQ8 | Calumenin                                                             | _N*VTYGTYLDDPDPDDGFNY<br>K_                                                |
| 359 | Q71KU9 | Fibrinogen-like protein 1                                             | _IDLDFEKN*SSFAQYQSFK_                                                      |
| 360 | Q75N73 | Zinc transporter ZIP14                                                | _YGKN*DSLTLTQLK_<br>_SLLDHLHVGVRDN*VSQPK_                                  |
| 361 | Q7TN73 | CAS1 domain-containing protein 1                                      | _MN*ITSIAPLLEK_                                                            |
| 362 | Q7TQD7 | Unconventional myosin-Ib                                              | _AAHIFN*ESLVCHQIR_                                                         |
| 363 | Q80V26 | Inositol monophosphatase 3                                            | _QVALQTFGN*QTSIIPAGGAG<br>YK_                                              |
| 364 | Q80WQ6 | Inactive rhomboid protein 2                                           | _WQN*DTGPSDKSDLSQK_                                                        |

|     |        |                                                            |                                                                                                |
|-----|--------|------------------------------------------------------------|------------------------------------------------------------------------------------------------|
| 365 | Q80XL7 | Metallophosphoesterase 1                                   | _ASDAN*CSGEDAAPPEER_<br>_KLN*CSQEVPGSSQCDREPEP<br>R_                                           |
| 366 | Q80XN0 | D-beta-hydroxybutyrate<br>dehydrogenase, mitochondrial     | _TIQLN*VCNSEEVEK_                                                                              |
| 367 | Q80YX1 | Tenascin                                                   | _LLQTAEHN*ISGAER_                                                                              |
| 368 | Q8BFR4 | N-acetylglucosamine-6-sulfatase                            | _TPMTN*SSIR_<br>_YPHNHHVVN*NTLEGN*CSS<br>K_<br>_YYN*YTLSINGK_<br>_GPGIKPN*QTSK_<br>_GDRN*LTWR_ |
| 369 | Q8BG07 | Phospholipase D4                                           | _ELGAIYN*CSNLAQDLEK_<br>_N*ISVVVATHSPTLAK_                                                     |
| 370 | Q8BG19 | Transmembrane and TPR repeat-<br>containing protein 4      | _NLADQGN*QTAAIK_                                                                               |
| 371 | Q8BGQ4 | Protein O-mannosyl-transferase 2                           | _FSGAN*DTDFR_                                                                                  |
| 372 | Q8BGT0 | Osteopetrosis-associated<br>transmembrane protein 1        | _NIGN*TSEGPR_                                                                                  |
| 373 | Q8BH24 | Transmembrane 9 superfamily<br>member 4                    | _KCEVLCN*QSNKPITLTVEQS<br>R_                                                                   |
| 374 | Q8BH35 | Complement component C8 beta<br>chain                      | _AVN*GSLVK_                                                                                    |
| 375 | Q8BHC0 | Lymphatic vessel endothelial<br>hyaluronic acid receptor 1 | _NKNPQMN*FTEANEACK_                                                                            |
| 376 | Q8BHG3 | Cell cycle control protein 50B                             | _QGN*YSAGLPR_                                                                                  |
| 377 | Q8BI84 | Melanoma inhibitory activity<br>protein 3                  | _TGN*SSPASVER_                                                                                 |

|     |        |                                                                        |                                                                 |
|-----|--------|------------------------------------------------------------------------|-----------------------------------------------------------------|
| 378 | Q8BJ83 | TM2 domain-containing protein 3                                        | _NFVIN*MTCR_<br>_DHIHCLGN*R_<br>_YFAN*CTVR_                     |
| 379 | Q8BJS4 | SUN domain-containing protein 2                                        | _ALSPN*STISSAPK_                                                |
| 380 | Q8BK48 | Pyrethroid hydrolase Ces2e                                             | _IVAN*LSGCAAVNSETLMCC<br>LR_                                    |
| 381 | Q8BKU8 | Transmembrane protein 87B                                              | _KTMFN*STEIK_                                                   |
| 382 | Q8BLF1 | Neutral cholesterol ester hydrolase<br>1                               | _GNYDFVEAMIVNN*HTSLDV<br>ER_                                    |
| 383 | Q8BLK3 | Limbic system-associated<br>membrane protein                           | _GTDN*ITVR_                                                     |
| 384 | Q8BLY1 | SPARC-related modular calcium-<br>binding protein 1                    | _LN*NTNVR_                                                      |
| 385 | Q8BM72 | Heat shock 70 kDa protein 13                                           | _N*STIQAANLAGLK_                                                |
| 386 | Q8BM88 | Cathepsin O                                                            | _YPAEGQRPIPN*VSLPLR_<br>_WLN*ETQLK_                             |
| 387 | Q8BNX1 | C-type lectin domain family 4<br>member G                              | _DDIGACRN*CCSVTK_                                               |
| 388 | Q8BS35 | Alkylglycerol monooxygenase                                            | _SPGAQDN*VSVSQGMR_                                              |
| 389 | Q8BSY0 | Aspartyl/asparaginyl beta-<br>hydroxylase                              | _GGGGN*SSSSGSGSGSGSGSP<br>STGSSGSSSPGAR_<br>_VYEEVLN*VTPNDGFAK_ |
| 390 | Q8BTJ4 | Ectonucleotide<br>pyrophosphatase/phosphodiesterase<br>family member 4 | _SN*YSVIDLTPVAAILPK_<br>_IN*VTEVYDKLK_                          |
| 391 | Q8BVL6 | Protein Rarres1 (Fragment)                                             | _NEKPRPAVN*VTCAR_                                               |
| 392 | Q8BWT1 | 3-ketoacyl-CoA thiolase,<br>mitochondrial                              | _DGTVTAGN*ASGVSDGAGA<br>VIIASEDAVKK_                            |
| 393 | Q8BXA5 | Cleft lip and palate transmembrane<br>protein 1-like protein           | _VKDLMVIN*R_<br>_TVN*VSVPPK_                                    |

|     |        |                                                                 |                          |
|-----|--------|-----------------------------------------------------------------|--------------------------|
| 394 | Q8BXZ1 | Protein disulfide-isomerase TMX3                                | _LVAIAVIDEKN*TSLEHTR_    |
| 395 | Q8BY89 | Choline transporter-like protein 2                              | _TCNPETFPLRN*ESLQCPTAR_  |
|     |        |                                                                 | _KN*ITDLVEGAK_           |
|     |        |                                                                 | _GVL MVGN*ETTYEDGHGAR_   |
| 396 | Q8BYB9 | Protein O-glucosyltransferase 1                                 | _FLSYN*VTR_              |
| 397 | Q8C0Z1 | Protein ITFG3                                                   | _NTN*SSNN*LTR_           |
|     |        |                                                                 | _KPILGHYKPD TLAVVIEN*GT  |
|     |        |                                                                 | SIDR_                    |
| 398 | Q8C129 | Leucyl-cystinyl aminopeptidase                                  | _TN*QSAELIQPVATNGK_      |
|     |        |                                                                 | _DIILHSTGHN*ISR_         |
| 399 | Q8C165 | Probable carboxypeptidase<br>PM20D1                             | _GAIQIPTVSFSHEESN*TTALA  |
|     |        |                                                                 | EFGEYIRK_                |
|     |        |                                                                 | _HYAN*ITNGMYR_           |
|     |        |                                                                 | _GALDLMLQVN*MTPGHSSAP    |
|     |        |                                                                 | PK_                      |
| 400 | Q8C196 | Carbamoyl-phosphate synthase<br>[ammonia], mitochondrial        | _ILDYHQEACN*GCIISVGGQI   |
|     |        |                                                                 | PNNLAVPLYKNGVK_          |
|     |        |                                                                 | _ALENN*MSLDEIVR_         |
|     |        |                                                                 | _VAGLLVLN*YSNDYNHWLA     |
|     |        |                                                                 | TK_                      |
|     |        |                                                                 | _DGSIDLVINLPNN*NTK_      |
| 401 | Q8C341 | Protein osteopotenia                                            | _SISEN*ATATTEPK_         |
| 402 | Q8C7X2 | Uncharacterized protein KIAA0090                                | _FINYN*QTVSR_            |
| 403 | Q8C8K1 | Ephrin type-B receptor 4                                        | _SVVHHLN*GSTLR_          |
| 404 | Q8CDV7 | Ectonucleoside triphosphate<br>diphosphohydrolase 1             | _VVN*VSELYGTPCTK_        |
| 405 | Q8CG14 | Complement C1s-A subcomponent                                   | _ITAN*STWEPDKAK_         |
| 406 | Q8CHT0 | Delta-1-pyrroline-5-carboxylate<br>dehydrogenase, mitochondrial | _EAGLPPNIIQFVPADGPTFGD   |
|     |        |                                                                 | TVTSSEHL CGIN*FTGSVPTFK_ |

|     |        |                                                         |                                                                                                                  |
|-----|--------|---------------------------------------------------------|------------------------------------------------------------------------------------------------------------------|
| 407 | Q8CID3 | Protein FAM20A                                          | _DLGTASHN*FSGALPR_                                                                                               |
| 408 | Q8CIF4 | Biotinidase                                             | _WNPCLEPFRFN*DTEVLQR_<br>_YQFNTNVVFSND*GTLVDR_<br>_GVQIIVFPEDGIHGFN*FTR_<br>_GHLIAQVATNPQGLTGTGN*<br>TTSEMDPSHR_ |
| 409 | Q8CIM7 | Cytochrome P450 2D26                                    | _GTTLIPN*LSSVLKDETVWEK<br>PLR_                                                                                   |
| 410 | Q8CJ91 | CD209 antigen-like protein B                            | _IPIFQGQN*ESIQEK_                                                                                                |
| 411 | Q8CJH3 | Plexin-B1                                               | _YTSDPN*VTSVGPSK_                                                                                                |
| 412 | Q8JZZ0 | UDP-glucuronosyltransferase 3A2                         | _VSQVLHEGGHN*VTK_                                                                                                |
| 413 | Q8K094 | Poliovirus receptor                                     | _ISWPSNVN*GSHR_                                                                                                  |
| 414 | Q8K0B2 | Probable lysosomal cobalamin transporter                | _GN*STLAVPK_                                                                                                     |
| 415 | Q8K0E8 | Fibrinogen beta chain                                   | _YKGTAGNALMDGASQLVGE<br>N*R_                                                                                     |
| 416 | Q8K0L2 | Ectonucleoside triphosphate diphosphohydrolase 8        | _QSLNTVN*DTVWK_                                                                                                  |
| 417 | Q8K0R6 | Glycolipid transfer protein domain-containing protein 2 | _AAGVLEDVYN*RTQGLLAG<br>HGLLQLA_                                                                                 |
| 418 | Q8K297 | Procollagen galactosyltransferase 1                     | _TALWVATDHNTDN*TSAILR<br>_<br>_AMN*TSQVEAMGIQMLPGY<br>R_                                                         |
| 419 | Q8K299 | Scavenger receptor class A member 5                     | _LVN*GSGPHQGR_                                                                                                   |
| 420 | Q8K2C7 | Protein OS-9                                            | _YHSQTYGN*GSK_                                                                                                   |
| 421 | Q8K385 | Ferric-chelate reductase 1                              | _HSQQPLITYEKYN*VTDTPK_                                                                                           |

|     |        |                                                                       |                                                               |
|-----|--------|-----------------------------------------------------------------------|---------------------------------------------------------------|
| 422 | Q8K389 | CDK5 regulatory subunit-associated protein 2                          | _LHSEN*VTK_                                                   |
| 423 | Q8K441 | ATP-binding cassette sub-family A member 6                            | _TSLLVIN*NTESNIEDFLQSLK_                                      |
| 424 | Q8K442 | ATP-binding cassette sub-family A member 8-A                          | _KILASPNEEN*MTELISMR_<br>_NYN*FTLACNTK_                       |
| 425 | Q8K4G1 | Isoform 2 of Latent-transforming growth factor beta-binding protein 4 | _N*ATSVDSGAPGGAAPGGPG<br>FR_                                  |
| 426 | Q8K4Q8 | Collectin-12                                                          | _VQSLQTLAAN*NSALAK_<br>_ETLQN*NSFLITTVN*K_<br>_DLQDLHKDTEN*R_ |
| 427 | Q8QZR3 | Pyrethroid hydrolase Ces2a                                            | _TVAN*LSGCEATDSEALIHCL<br>R_                                  |
| 428 | Q8QZT1 | Acetyl-CoA acetyltransferase, mitochondrial                           | _EN*GTITAAN*ASTLNDGAA<br>ALVLMTAEAAQR_                        |
| 429 | Q8R084 | Protein Ugt2b1                                                        | _WVGN*WTYELKK_                                                |
| 430 | Q8R0F3 | Sulfatase-modifying factor 1                                          | _FVN*STGYLTEAEK_                                              |
| 431 | Q8R0I0 | Angiotensin-converting enzyme 2                                       | _CDISN*STEAGQK_                                               |
| 432 | Q8R121 | Protein Z-dependent protease inhibitor                                | _ETYFN*LSKK_<br>_EGN*FTSTFDKK_                                |
| 433 | Q8R143 | Pituitary tumor-transforming gene 1 protein-interacting protein       | _VGCSEYTN*R_                                                  |
| 434 | Q8R180 | ERO1-like protein alpha                                               | _WGHN*VTEFQQR_                                                |
| 435 | Q8R1J9 | Torsin-2A                                                             | _SWVQGN*LTACGR_                                               |

|     |        |                                                                         |                                                                                                  |
|-----|--------|-------------------------------------------------------------------------|--------------------------------------------------------------------------------------------------|
| 436 | Q8R1V4 | Transmembrane emp24 domain-containing protein 4                         | _FTFTSHTPGDHDQICLHSN*STR_<br>R_                                                                  |
| 437 | Q8R242 | Di-N-acetylchitobiase                                                   | _QVN*GSVSGSQWNK_<br>_                                                                            |
| 438 | Q8R2E9 | ERO1-like protein beta                                                  | _LGAIN*STLSN*ESK_<br>_YSQAAN*STKELDDCEQANK<br>_                                                  |
| 439 | Q8R2Q8 | Bone marrow stromal antigen 2                                           | _TQDSLLQAETQAN*SCN*LTV<br>VTLQESLEKK_<br>_N*TTHLLQR_<br>_                                        |
| 440 | Q8R2R1 | Protein O-mannosyl-transferase 1                                        | _FVHVN*TSAILK_<br>_                                                                              |
| 441 | Q8R366 | Immunoglobulin superfamily member 8                                     | _IGPGEPELLELCN*VSGALPPPG<br>R_<br>_                                                              |
| 442 | Q8R3G9 | Tetraspanin-8                                                           | _ILN*ETLYENAK_<br>_                                                                              |
| 443 | Q8R3H7 | Heparan sulfate 2-O-sulfotransferase 1                                  | _YHVLHIN*TTK_<br>_                                                                               |
| 444 | Q8R420 | ATP-binding cassette sub-family A member 3                              | _YHAN*TSAQQLFQK_<br>_                                                                            |
| 445 | Q8R4G6 | Alpha-1,6-mannosylglycoprotein 6-beta-N-acetylglucosaminyltransferase A | _RQN*QSLVYGK_<br>_                                                                               |
| 446 | Q8R4U0 | Stabilin-2                                                              | _NAN*CSTVSPGQTQCTCQK_<br>_YGPQCN*R_<br>_CDNN*DTIIVR_<br>_VLLN*LTTVAANHGYTK_<br>_ITN*GTVGVR_<br>_ |
| 447 | Q8VBZ3 | Cleft lip and palate transmembrane protein 1 homolog                    | _DYYPIN*ESLASLPLR_<br>_                                                                          |
| 448 | Q8VCC2 | Liver carboxylesterase 1                                                | _TAASILWQAYPILN*ISEK_<br>_                                                                       |

|     |        |                                                                |                                                                              |
|-----|--------|----------------------------------------------------------------|------------------------------------------------------------------------------|
| 449 | Q8VCF1 | Soluble calcium-activated nucleotidase 1                       | _ISHYN*DTYPLSPPQR_                                                           |
| 450 | Q8VCG4 | Complement component C8 gamma chain                            | _SLPVN*DSVLDVFER_<br>_VREAN*LTEDQILFFPK_                                     |
| 451 | Q8VCI0 | Phospholipase B-like 1                                         | _TIYN*WSGYPLLVHK_<br>_TVLDKNGDAYGYYN*DSIK_<br>_RDQGN*VTDMASMK_<br>_FN*ETLHR_ |
| 452 | Q8VCM8 | Nicalin                                                        | _VIYN*LTEK_                                                                  |
| 453 | Q8VCS0 | N-acetylmuramoyl-L-alanine amidase                             | _LEPEHLQLQN*ISQEQLAQVA<br>TLATK_                                             |
| 454 | Q8VCS9 | Transporter                                                    | _GVSSSEN*FTSPVMEFWER_                                                        |
| 455 | Q8VCT4 | Carboxylesterase 1D                                            | _DGASEEETN*LSK_<br>_N*TTSYPPMCSQDAVGGQVL<br>SELFTNRK_                        |
| 456 | Q8VCU1 | Carboxylesterase 3B                                            | _NVN*ISYIVN*DSFFPQRPEK_<br>_YAFQELLGDISFIPTLN*FSK_                           |
| 457 | Q8VCU2 | Phosphatidylinositol-glycan-specific phospholipase D           | _NLN*YTER_<br>_LSSSPN*VTISCK_<br>_VN*GTLTQVLLVGAPTHDDV<br>SK_                |
| 458 | Q8VCV9 | Sodium-dependent glucose transporter 1A                        | _LAWGTAPAQN*HTESDLDTL<br>MLN*R_                                              |
| 459 | Q8VCW8 | Acyl-CoA synthetase family member 2, mitochondrial             | _GATLSHHNIVN*NSMLIGQR_                                                       |
| 460 | Q8VDB2 | Dol-P-Man:Man(7)GlcNAc(2)-PP-Dol alpha-1,6-mannosyltransferase | _YDKSEVDGAAAMLN*YTHIL<br>MEAVPGHPALYR_                                       |
| 461 | Q8VDN2 | Sodium/potassium-transporting ATPase subunit alpha-1           | _IISAN*GCKVDNSSLTGESEPP<br>TR_<br>_GVGIISEGN*ETVEDIAAR_                      |
| 462 | Q8VEK0 | Cell cycle control protein 50A                                 | _NEDRPIAPCGAIANSMFN*DT<br>LELYLVAN*ESDPKPIPIPLK_<br>_CLSPN*VTSCACTIN*FTLK_   |



|     |        |                                                                          |                                                                          |
|-----|--------|--------------------------------------------------------------------------|--------------------------------------------------------------------------|
|     |        |                                                                          | _DDLHPTLPAGQYFLN*ITYNY<br>PVHSDGR_                                       |
| 463 | Q8VEK3 | Heterogeneous nuclear ribonucleoprotein U                                | _GN*FTLPEVAECFDEITYVEL<br>QKEEAQK_                                       |
| 464 | Q8VHI3 | GDP-fucose protein O-fucosyltransferase 2                                | _SQHLN*STDAADK_                                                          |
| 465 | Q8VI47 | Canalicular multispecific organic anion transporter 1                    | _QN*GTDNSPSQR_                                                           |
| 466 | Q91V08 | C-type lectin domain family 2 member D                                   | _WTDNTEYN*NTIPIRGEER_<br>_TEQIPVN*K_                                     |
| 467 | Q91VI7 | Ribonuclease inhibitor                                                   | _LQLEYCN*LTATSCEPLASVL<br>R_                                             |
| 468 | Q91WN2 | Transmembrane protein 150A                                               | _HVCNVENWSYN*ESCSPDPA<br>EQGGPK_                                         |
| 469 | Q91WU0 | Expressed sequence AU018778                                              | _N*ATTYPPMCSQDAAR_                                                       |
| 470 | Q91X72 | Hemopexin                                                                | _SWSTVGN*CTAALR_<br>_N*GTAHGN*STHPMHSR_                                  |
| 471 | Q91XL1 | Leucine-rich HEV glycoprotein                                            | _MFSQN*DTR_                                                              |
| 472 | Q91Y47 | Coagulation factor XI                                                    | _VYGGIVN*QSEINEGTAFFR_<br>_GMNYN*SSVVK_<br>_LESAMN*YTDFQRPICLPSKG<br>DR_ |
| 473 | Q91Y74 | CMP-N-acetylneuraminase-beta-galactosamide-alpha-2,3-sialyltransferase 4 | _SMAGSGHN*VSQEAIAIKR_                                                    |
| 474 | Q91YQ5 | Dolichyl-diphosphooligosaccharide--protein glycosyltransferase subunit 1 | _TILPAAAQDVYYRDEIGN*VS<br>TSHLLILDDSVEMEIRPR_                            |
| 475 | Q91ZJ9 | Hyaluronidase-1                                                          | _EELGTYPYYTPTGEPVFGGLP<br>QN*ASLVTHLAHTFQDIK_                            |
| 476 | Q91ZX7 | Prolow-density lipoprotein                                               | _VDIPQQPMGIIAVAN*DTN*S                                                   |

receptor-related protein 1

CELSPCR\_  
\_WQCDYDN\*DCGDNSEDEESC  
TPRPCSESEFSCANGR\_  
\_WLCDGDN\*DCGNSEDESN\*A  
TCSAR\_  
\_VWVCDRDN\*DCVDGSDEPA  
N\*CTQMTCGVDEFR\_  
\_INNGGCQDLCLLTHQGHVN\*  
CSCR\_  
\_MGCQHHCVPTPSGPTCYCN\*  
SSFQLQADGK\_  
\_GVTHLN\*ISGLK\_  
\_LTSCATN\*ASMCGDEAR\_  
\_MHLN\*GSNVQVLHR\_  
\_DGSCIGN\*SSR\_  
\_CN\*ASSQFLCSSGR\_  
\_TCVSN\*CTASQFVCK\_  
\_LHKDN\*TTCYEFK\_  
\_QTGDVTCN\*CTDGR\_  
\_LN\*GTDPIVAADSKR\_  
\_IETILLN\*GTDRK\_  
\_RGCKDN\*ATDSVPLR\_  
\_VNRFN\*STEYQVVTR\_  
\_AFIN\*GTGVETVVSADLPNA  
HGLAVDWVSR\_  
\_LYWISSGN\*HTINR\_  
\_FGTCSQLCN\*NTK\_  
\_CDMDGQN\*R\_  
\_TCPLDEFQCN\*NTLCKPLAW  
K\_  
\_LYWTDGDN\*ISMANMDGSN  
\*HTLLFSGQK\_  
\_KLNLDGSN\*YTLLK\_  
\_GPCSHLCLINYN\*R\_  
\_WTGHN\*VTVVQR\_  
\_DGGSTTAGN\*SSQVSDGAAA  
VLLAR\_  
\_N\*GSYDIGMACGVESMSLSG  
MGNPGNISSR\_  
\_SFGN\*ISER\_

477 Q921H8 3-ketoacyl-CoA thiolase A,  
peroxisomal

478 Q921L8 Polypeptide N-  
acetylgalactosaminyltransferase 11

|     |        |                                                       |                                                                                                                           |
|-----|--------|-------------------------------------------------------|---------------------------------------------------------------------------------------------------------------------------|
| 479 | Q923B6 | Metalloreductase STEAP4                               | _LRN*ATITQALTNK_                                                                                                          |
| 480 | Q924Z4 | Ceramide synthase 2                                   | _LWLVPVN*LTWADLEDKDGR_                                                                                                    |
| 481 | Q925Q3 | Sodium/potassium/calcium<br>exchanger 6               | _AVCGLN*TSDRCDFVR_                                                                                                        |
| 482 | Q925U4 | ER degradation-enhancing alpha-<br>mannosidase-like 1 | _VIN*SSSNCNRVPDER_                                                                                                        |
| 483 | Q99J21 | Mucolipin-1                                           | _GHVDPAN*DTFDIDPR_                                                                                                        |
| 484 | Q99JR5 | Tubulointerstitial nephritis antigen-<br>like         | _GRADECALPYLGATCYCDLF<br>CN*R_                                                                                            |
| 485 | Q99JY8 | Lipid phosphate phosphohydrolase<br>3                 | _LRPHFLSVCDPDFSQIN*CSE<br>GYIQNYR_                                                                                        |
| 486 | Q99K41 | EMILIN-1                                              | _LGALN*NSLLLLLEDR_<br>_LEKLEGLLAN*VSR_<br>_LN*LTAQQLSQLEGLLQAR_<br>_LEDRFN*STLGPSEEQEKNWP<br>GGPGR_<br>_ESN*STSLTQAALLEK_ |
| 487 | Q99KF1 | Transmembrane emp24 domain-<br>containing protein 9   | _FTFSTHTPGEHQICLHSN*STK<br>_                                                                                              |
| 488 | Q99KI0 | Aconitate hydratase, mitochondrial                    | _HPN*GTQETILLN*HTFNETQI<br>EWR_                                                                                           |
| 489 | Q99MB1 | Toll-like receptor 3                                  | _LTHIPDDLPSN*ITVLN*LTHN<br>QLR_                                                                                           |
| 490 | Q99MQ4 | Asporin                                               | _ITDIEN*GTFANIPR_                                                                                                         |
| 491 | Q99PG0 | Arylacetamide deacetylase                             | _AMLLNQHVPMESSHLLQFVN<br>*WSSLLPER_                                                                                       |
| 492 | Q9CPW5 | Translocon-associated protein<br>subunit beta         | _IAPASN*VSHTVVLRLK_<br>_AGYFN*FTSATITYLAQEDGP<br>VVIGSTSAPGQGGILAQR_                                                      |
| 493 | Q9CQ88 | Tetraspanin-31                                        | _NTQADVIN*ASWSVLSN*STR<br>_<br>_SFDCCGLFN*LTTLR_                                                                          |
| 494 | Q9CQF9 | Prenylcysteine oxidase                                | _MSN*ITFR_<br>_LLN*QTLR_                                                                                                  |

|     |        |                                                          |                                                                  |
|-----|--------|----------------------------------------------------------|------------------------------------------------------------------|
| 495 | Q9CQW3 | Vitamin K-dependent protein Z                            | _CSLLHSN*ISVK_                                                   |
| 496 | Q9CQX5 | Claudin domain-containing protein 1                      | _SPIQEN*SSDSNK_<br>_YN*GSLGLWR_                                  |
| 497 | Q9CRA0 | Ecto-ADP-ribosyltransferase 4                            | _SAGN*MSTYNCQLLK_                                                |
| 498 | Q9CY50 | Translocon-associated protein subunit alpha              | _YPQDYQFYIQN*FTALPLNTV<br>VPPQR_<br>_DLNGNVFQDAVFN*QTVTVI<br>ER_ |
| 499 | Q9CYA0 | Cysteine-rich with EGF-like domain protein 2             | _N*ETHSICSACDESK_                                                |
| 500 | Q9CZ13 | Cytochrome b-c1 complex subunit 1, mitochondrial         | _VVELLADIVQN*SSLEDSQIE<br>KER_                                   |
| 501 | Q9D1H9 | Microfibril-associated glycoprotein 4                    | _RFN*GSVSFFR_<br>_VDLEDFEN*NTAYAK_                               |
| 502 | Q9D304 | E3 ubiquitin-protein ligase RNF128                       | _VPHTGVN*R_                                                      |
| 503 | Q9D404 | 3-oxoacyl-[acyl-carrier-protein] synthase, mitochondrial | _GPN*HSVSTACTTGAHAVGD<br>SFR_                                    |
| 504 | Q9D6Z1 | Nucleolar protein 56                                     | _LAALALASSEN*SSTPEECE<br>VNEK_                                   |
| 505 | Q9D7N9 | Adipocyte plasma membrane-associated protein             | _AGPN*GTLFVVDAYK_                                                |
| 506 | Q9D8C2 | Tetraspanin-13                                           | _SYNPN*DTCPASCAK_                                                |
| 507 | Q9D8N1 | Uncharacterized protein C11orf24 homolog                 | _AVN*QSMLR_                                                      |
| 508 | Q9DAU1 | Protein canopy homolog 3                                 | _VVMDIPYELWN*ETSAEVAD<br>LKK_                                    |

|     |        |                                                  |                                                                                                      |
|-----|--------|--------------------------------------------------|------------------------------------------------------------------------------------------------------|
| 509 | Q9DB05 | Alpha-soluble NSF attachment protein             | _AIAHYEQSADYYKGEESN*SS<br>ANK_                                                                       |
| 510 | Q9DB77 | Cytochrome b-c1 complex subunit 2, mitochondrial | _AVAQGN*LSSADVQAAK_                                                                                  |
| 511 | Q9DBB9 | Carboxypeptidase N subunit 2                     | _LQDLEITGSPVSN*LSAHIFSN<br>*LSSLEK_<br>_LSLDSN*NLTALHPALFHN*L<br>SR_<br>_LQLLN*LSR_<br>_AFSGSPN*LTK_ |
| 512 | Q9DBD0 | Inhibitor of carbonic anhydrase                  | _SCHTAVGTSEGWNVPMGLIY<br>N*QTGSCK_<br>_DLLFSDDTECLSNLQN*K_                                           |
| 513 | Q9DBH5 | Vesicular integral-membrane protein VIP36        | _VFPYISVMVNN*GSLSYDHS<br>KDGR_                                                                       |
| 514 | Q9DBI0 | Transmembrane protease serine 6                  | _ELLVDELLSN*SSTLASYK_                                                                                |
| 515 | Q9DBN1 | Protein 1300002K09Rik                            | _QIN*ITCDNPVDR_                                                                                      |
| 516 | Q9DBU0 | Transmembrane 9 superfamily member 1             | _IIFAN*VSVR_                                                                                         |
| 517 | Q9DBX3 | Sushi domain-containing protein 2                | _SQLVN*ETHWQYYGTSDTR_<br>_MPN*GTQAR_<br>_FCILDVMSTGSSSVGN*ATR_<br>_CCGVSN*YTDWFEVYN*ATR              |
| 518 | Q9DCK3 | Tetraspanin-4                                    | -<br>_FQVPCPLAHNLAN*ATGN*FS<br>HMOVVAEEK_                                                            |
| 519 | Q9DCP2 | Sodium-coupled neutral amino acid transporter 3  | -<br>_FQVPCPLAHNLAN*ATGN*FS<br>HMOVVAEEK_                                                            |
| 520 | Q9EPK6 | Nucleotide exchange factor SIL1                  | _FN*SSSSSLEEK_                                                                                       |
| 521 | Q9EPR4 | Solute carrier family 23 member 2                | _CN*TTEITVAN*GTAEELLEHI<br>WHPR_                                                                     |

|     |        |                                                                  |                                                                                                                         |
|-----|--------|------------------------------------------------------------------|-------------------------------------------------------------------------------------------------------------------------|
| 522 | Q9EPT5 | Solute carrier organic anion transporter family member 2A1       | _QPIYLN*CSCVTGGSASAK_                                                                                                   |
| 523 | Q9EQG7 | Ectonucleotide pyrophosphatase/phosphodiesterase family member 5 | _VQPIVAVADEGWYILQN*K_                                                                                                   |
| 524 | Q9EQH2 | Endoplasmic reticulum aminopeptidase 1                           | _CFN*AMEVDALN*SSHPVSTP<br>VENPAQIR_                                                                                     |
| 525 | Q9EQJ0 | Two pore calcium channel protein 1                               | _LTPNCCN*TSTVADAYR_                                                                                                     |
| 526 | Q9ER39 | Torsin-1A                                                        | _GN*VSACAR_                                                                                                             |
| 527 | Q9ER41 | Torsin-1B                                                        | _FTECCHEERPLN*TSALK_                                                                                                    |
| 528 | Q9ERU9 | E3 SUMO-protein ligase RanBP2                                    | _LNSN*NSASPHR_                                                                                                          |
| 529 | Q9ESB3 | Histidine-rich glycoprotein                                      | _LPPLNIGEVLTLPEANFPSFSL<br>PNCN*R_<br>_YSN*ESQDLSVNGYN*CTTSS<br>VSSALR_<br>_N*CSTQHFPR_<br>_LQEGALPQLPPGYPPHSGAN*<br>R_ |
| 530 | Q9ET22 | Dipeptidyl peptidase 2                                           | _ALAGLVYN*SSGTEPCYDIYR<br>_                                                                                             |
| 531 | Q9ET30 | Transmembrane 9 superfamily member 3                             | _IVDVN*LTSEGK_                                                                                                          |
| 532 | Q9JHJ3 | Lysosomal protein NCU-G1                                         | _LLEFDSTN*ASEGAQPPGKPY<br>PPYSLAK_                                                                                      |
| 533 | Q9JI71 | Delta-like protein 4                                             | _TDEQN*DTLTR_                                                                                                           |
| 534 | Q9JIL4 | Na(+)/H(+) exchange regulatory cofactor NHE-RF3                  | _AGVLADDHLIEVNGENVEN*<br>ASHEEVVEK_                                                                                     |

|     |        |                                                                                               |                                                                                                                                                                                                                    |
|-----|--------|-----------------------------------------------------------------------------------------------|--------------------------------------------------------------------------------------------------------------------------------------------------------------------------------------------------------------------|
| 535 | Q9JIM1 | Equilibrative nucleoside transporter 1                                                        | _YFTNRLDVSQN*VSSDTDQS<br>CESTK_                                                                                                                                                                                    |
| 536 | Q9JJF9 | Signal peptide peptidase-like 2A                                                              | _IAQEGGAAALLIAN*NSVLIPS<br>SR_                                                                                                                                                                                     |
| 537 | Q9JJK5 | Homocysteine-responsive endoplasmic reticulum-resident ubiquitin-like domain member 1 protein | _GAESTEQPDNSN*QTQHPGD<br>SSSDGLR_                                                                                                                                                                                  |
| 538 | Q9JL3  | Solute carrier organic anion transporter family member 1B2                                    | _YATENDISSLHN*STLTCLVN<br>*QTTSLTGTSPEIMEK_                                                                                                                                                                        |
| 539 | Q9JJR8 | Transmembrane protein 9B                                                                      | _ENPGHIYNKN*ISQK_                                                                                                                                                                                                  |
| 540 | Q9JJX6 | P2X purinoceptor 4                                                                            | _GVAVTN*TSQLGFR_<br>_CVPFN*ASVK_<br>_AAEN*FTLLVK_<br>_NILPN*ITTSYLK_                                                                                                                                               |
| 541 | Q9JKF6 | Poliovirus receptor-related protein 1                                                         | _ADANPPATEYHWTTLN*GSL<br>PK_<br>_NPN*GTVTVISR_                                                                                                                                                                     |
| 542 | Q9JKR6 | Hypoxia up-regulated protein 1                                                                | _DKN*GTRAEPPLN*ASAGDQ<br>EEK_<br>_FQISPQLQFSPEEVLGMVLN*<br>YSR_<br>_LSALDNLLN*HSSIFLK_<br>_EN*GTDAVQEEEEESPAEGSK<br>DEPAEQGELK_<br>_VIN*DTWAWKN*ATLAEQA<br>K_<br>_VFGSQN*LTTVK_<br>_QYCTEQN*ATLVK_<br>_RN*LTWEESK_ |
| 543 | Q9JL99 | C-type lectin domain family 1 member B                                                        | _RN*LTWEESK_                                                                                                                                                                                                       |
| 544 | Q9QUN9 | Dickkopf-related protein 3                                                                    | _GGN*GTICDNQR_                                                                                                                                                                                                     |

|     |        |                                                            |                                                                                   |
|-----|--------|------------------------------------------------------------|-----------------------------------------------------------------------------------|
| 545 | Q9QWR8 | Alpha-N-acetylgalactosaminidase                            | _VN*YTEVSR_                                                                       |
| 546 | Q9QXC1 | Fetuin-B                                                   | _VLYLPAYN*CTLRPVSK_                                                               |
| 547 | Q9QXZ6 | Solute carrier organic anion transporter family member 1A1 | _SVGTGTNMVFQN*CSCIGSSG<br>N*SSAVLGLCK_<br>_YKYETTISPTSN*LSSNSFLCI<br>EN*R_        |
| 548 | Q9QY81 | Nuclear pore membrane glycoprotein 210                     | _GLMVGN*GSVLGVVQAVDA<br>ETGK_<br>_IEAVLPAEFFEVLSSSQN*GSY<br>HHR_<br>_GATN*NTCIIR_ |
| 549 | Q9QYC7 | Vitamin K-dependent gamma-carboxylase                      | _VEN*GSETGPLPELQPLLEG<br>EVK_<br>_N*QTLQEGEK_                                     |
| 550 | Q9QZ25 | Vascular non-inflammatory molecule 3                       | _LTGSAGN*YTVQCQK_                                                                 |
| 551 | Q9QZC2 | Plexin-C1                                                  | _GACEVRPLGNLN*R_<br>_DQAGN*CTEPVSLAPPARPR_                                        |
| 552 | Q9R013 | Cathepsin F                                                | _VYIN*DSVELSRNENK_                                                                |
| 553 | Q9R069 | Basal cell adhesion molecule                               | _GN*LTLER_                                                                        |
| 554 | Q9R098 | Hepatocyte growth factor activator                         | _FCNIVPTEHCFLGN*GTEYR_                                                            |
| 555 | Q9R0A1 | Chloride channel protein 2                                 | _ETLVTLFDN*R_                                                                     |
| 556 | Q9R0E1 | Procollagen-lysine,2-oxoglutarate 5-dioxygenase 3          | _EQYIHEN*YSR_                                                                     |
| 557 | Q9R0E2 | Procollagen-lysine,2-oxoglutarate 5-dioxygenase 1          | _EQIN*ISLDHR_                                                                     |
| 558 | Q9R0L9 | Sialomucin core protein 24                                 | _TYCANEPLSN*CSQVN*R_                                                              |
| 559 | Q9R182 | Angiopoietin-related protein 3                             | _KDGSQDFN*ETWENYEK_                                                               |



|     |        |                                                               |                                                                |
|-----|--------|---------------------------------------------------------------|----------------------------------------------------------------|
| 560 | Q9R1W5 | Calcitonin gene-related peptide type 1 receptor               | _IMQDPIQQAEGLYCN*R_                                            |
| 561 | Q9WTP6 | Adenylate kinase 2, mitochondrial                             | _LAEN*FCVCHLATGDMLR_                                           |
| 562 | Q9WU60 | Attractin                                                     | _GICN*ASDTR_<br>_EWLPLN*HSVNSVVVR_<br>_IDSTGN*VTNELR_          |
| 563 | Q9WUH7 | Semaphorin-4G                                                 | _GYN*SSQDLPSLVLDLVK_<br>_GQTQN*YSTLLLEEASER_<br>_N*NQTECFNHVR_ |
| 564 | Q9WV54 | Acid ceramidase                                               | _SVLEN*TTSYEEAKNTLTK_                                          |
| 565 | Q9WVJ3 | Carboxypeptidase Q                                            | _EVMNLLQPLN*VTK_                                               |
| 566 | Q9WVL3 | Solute carrier family 12 member 7                             | _TAFAPPDIPVCLLGN*R_<br>_MQVVSN*GTVTTALWR_<br>_CLVPHTVN*LSSAWR_ |
| 567 | Q9Z0M5 | Lysosomal acid lipase/cholesteryl ester hydrolase             | _NYFHYN*QSFPPSYNIK_                                            |
| 568 | Q9Z1M0 | P2X purinoceptor 7                                            | _SAEN*FTVLIK_                                                  |
| 569 | Q9Z222 | UDP-GlcNAc:betaGal beta-1,3-N-acetylglucosaminyltransferase 2 | _ETNVGN*QTVVR_                                                 |
| 570 | Q9Z2A9 | Gamma-glutamyltransferase 5                                   | _LWDPSSHPGIQN*ISR_<br>_QLFFN*GTETLR_<br>_GDHHQLSHYN*LTGVR_     |
| 571 | Q9Z2G6 | Protein sel-1 homolog 1                                       | _MYSEGSDIVPQSN*ETALHYF<br>K_<br>_EATIVGEN*ETYPR_               |
| 572 | S4R1S4 | Receptor-type tyrosine-protein phosphatase C                  | _SLPN*NVTSEFEVESLKPYK_                                         |

---

**Table S4** The score and MS intensity of the N-glycopeptides identified by both dM-MNPs and M-MNPs.

| Modified sequence                               | Score   |        | Intensity  |                |       |
|-------------------------------------------------|---------|--------|------------|----------------|-------|
|                                                 | dM-MNPs | M-MNPs | dM-MNPs    | M-MNPs         | Ratio |
| _ACMN*ETRIEELR_                                 | 154.28  | 88.338 | 238580000  | 5157200        | 46.3  |
| _ADN*YTYEHLR_                                   | 118.4   | 55.721 | 58332000   | 3000400        | 19.4  |
| _ADSLYSQVVGLSAS<br>QAN*LSK_                     | 118.23  | 126.25 | 98100000   | 57063000       | 1.7   |
| _AELSN*HTRPVILVP<br>GCLGNR_                     | 206.7   | 110.6  | 524400000  | 39313000       | 13.3  |
| _AFMN*SSFTIDPK_                                 | 64.65   | 74.46  | 493860000  | 163600000      | 3.0   |
| _AFN*ECCTIANK_                                  | 119.76  | 110.66 | 308220000  | 54767000       | 5.6   |
| _AFSGSPN*LTK_                                   | 106.29  | 106.29 | 168950000  | 29880000       | 5.7   |
| _AFVEN*ITVLENSLV<br>FK_                         | 204.43  | 192.4  | 3027900000 | 166420000<br>0 | 1.8   |
| _AFYN*GTWYR_                                    | 159.37  | 144.09 | 147250000  | 11955000       | 12.3  |
| _AGIN*ASYSEK_                                   | 106.29  | 83.397 | 116030000  | 16929000       | 6.9   |
| _AGPN*GTLFVVDAY<br>K_                           | 106.13  | 117.92 | 650100000  | 222610000      | 2.9   |
| _AGYFN*FTSATITYL<br>AQEDGPVVGSTAP<br>GQGGILAQR_ | 184.55  | 121.82 | 1150800000 | 164040000      | 7.0   |
| _ALAAAGYDVEKN*N<br>SR_                          | 212.17  | 188.4  | 167310000  | 9723000        | 17.2  |
| _ALAGLVYN*SSGTEP<br>CYDIYR_                     | 191.37  | 134.37 | 357220000  | 126910000      | 2.8   |
| _ALGYEN*ATQALGR<br>_                            | 182.41  | 172.74 | 692940000  | 408960000      | 1.7   |
| _ALSPN*STISSAPK_                                | 102.73  | 88.552 | 392130000  | 100840000      | 3.9   |
| _ALVN*FTR_                                      | 169.37  | 148.07 | 339320000  | 121170000      | 2.8   |
| _AMSN*ISVR_                                     | 179.73  | 91.853 | 293460000  | 43948000       | 6.7   |
| _AMSSN*ETAAYK_                                  | 113.63  | 103.22 | 752860000  | 221020000      | 3.4   |
| _AN*ATIEVK_                                     | 101.43  | 103.56 | 205340000  | 38447000       | 5.3   |
| _AN*LSSQVLK_                                    | 114.89  | 94.309 | 318970000  | 73013000       | 4.4   |
| _AN*NSWFQSILK_                                  | 72.531  | 97.163 | 83332000   | 34740000       | 2.4   |
| _AN*TTQPGIVEGGQ<br>VLK_                         | 61.641  | 85.619 | 288590000  | 123310000      | 2.3   |
| _AN*YTILK_                                      | 85.265  | 73.616 | 90035000   | 44529000       | 2.0   |
| _ANQIVIPHN*TTFQT<br>EPTK_                       | 137.44  | 137.44 | 1312700000 | 421240000      | 3.1   |
| _APIPTALDTN*SSK_                                | 142.91  | 151.78 | 424530000  | 141150000      | 3.0   |
| _AQAALDKAN*ASR_                                 | 197.3   | 127.17 | 263850000  | 17783000       | 14.8  |
| _ASDAN*CSGEDAAP<br>PEER_                        | 120.29  | 79.013 | 36724000   | 8000600        | 4.6   |

|                                          |        |        |            |                |           |
|------------------------------------------|--------|--------|------------|----------------|-----------|
| _ASSFRPN*GTK_                            | 193.49 | 187.58 | 345340000  | 50990000       | 6.8       |
| _ATVN*DSGEYR_                            | 187.64 | 173.32 | 1251500000 | 623320000      | 2.0       |
| _AWGTPCELCPNVN*<br>TSEYK_                | 122.31 | 90.385 | 95664000   | 57843000       | 1.7       |
| _CDNN*DTIIVR_                            | 243.4  | 133.76 | 185860000  | 26364000       | 7.0       |
| _CDQCEENYFYN*R_                          | 130.01 | 122.51 | 13743000   | 18512000       | 0.7       |
| _CFN*AMEVDALN*S<br>SHPVSTPVENPAQIR_      | 198.05 | 164.43 | 526160000  | 105330000      | 5.0       |
| _CGNCN*LTSLEDEDF<br>CK_                  | 140.74 | 109.35 | 134080000  | 74965000       | 1.8       |
| _CHEGN*GTFECGAC<br>R_                    | 200.9  | 116.98 | 261290000  | 27873000       | 9.4       |
| _CLQMSSFAN*R_                            | 192.92 | 168.83 | 433730000  | 135010000      | 3.2       |
| _CN*ASSQFLCSSGR_                         | 169.09 | 156.08 | 136590000  | 69337000       | 2.0       |
| _CVAN*YTGN*GR_                           | 129.85 | 94.409 | 34255000   | 23555000       | 1.5       |
| _CVVHYEN*STVPEK<br>K_                    | 183.81 | 151.54 | 937550000  | 172700000      | 5.4       |
| _CVYEALCSN*VTSEC<br>PPPVITR_             | 91.725 | 81.016 | 38970000   | 14728000       | 2.6       |
| _CWAPILDN*DTASD<br>N*GSR_                | 218.28 | 111.92 | 317270000  | 24023000       | 13.2      |
| _CWAPILDN*DTASD<br>N*GSR_                | 218.28 | 251.13 | 317270000  | 155480000<br>0 | 0.2       |
| _DAMVGN*YTCEVTE<br>LSR_                  | 150.76 | 186.77 | 415510000  | 486520000      | 0.9       |
| _DATIQAYLSSGN*FS<br>K_                   | 89.541 | 62.861 | 12819000   | 10452000       | 1.2       |
| _DCVSCQN*VSR_                            | 176.6  | 155.06 | 2067000000 | 739300000      | 2.8       |
| _DCDFLEDGEERN*C<br>TGK_                  | 81.656 | 70.197 | 31431000   | 12385000       | 2.5       |
| _DFVN*ASSK_                              | 100.02 | 69.598 | 68455000   | 4853200        | 14.1      |
| _DGGSTTAGN*SSQV<br>SDGAAAVLLAR_          | 132.65 | 189.07 | 156810000  | 660760000      | 0.2       |
| _DGQQN*ISLLYTEPG<br>ASQTQTGASFR_         | 198.55 | 166.65 | 172890000  | 166850000      | 1.0       |
| _DGSCIGN*SSR_                            | 194.06 | 85.622 | 116690000  | 34032000       | 3.4       |
| _DGTSQPAICPQN*VT<br>MNMEGLK_             | 166.29 | 92.289 | 742350000  | 100210000      | 7.4       |
| _DGTVTAGN*ASGVS<br>DGAGAVIIASEDAVK<br>K_ | 169.57 | 230.8  | 228690000  | 212340000<br>0 | 0.1       |
| _DIILHSTGHN*ISR_                         | 127.02 | 78.763 | 79124000   | 5695400        | 13.9      |
| _DKN*GTRAEPPLN*A<br>SAGDQEEK_            | 174.81 | 96.591 | 4259600000 | 33302000       | 127.<br>9 |

|                                                                                                                                                                  |        |            |                |                |      |
|------------------------------------------------------------------------------------------------------------------------------------------------------------------|--------|------------|----------------|----------------|------|
| _DKN*GTRAEPPLN*A<br>SAGDQEEK_                                                                                                                                    | 174.81 | 228.46     | 169940000      | 104320000<br>0 | 0.2  |
| _DLAVGDDYTN*R_<br>_DLGPALAN*SSH<br>DV<br>K_                                                                                                                      | 152.54 | 208.6      | 119010000      | 96078000       | 1.2  |
| _DLLFSDDTECL<br>SNLQ<br>N*K_                                                                                                                                     | 128.22 | 127.36     | 1469000000     | 106870000      | 13.7 |
| _DLQNFLN*VTSS<br>VD<br>VK_                                                                                                                                       | 138.39 | 218.4      | 204300000      | 294160000      | 0.7  |
| _DN*ATQEEILH<br>YLEK<br>_                                                                                                                                        | 121.19 | 113.29     | 138190000      | 48721000       | 2.8  |
| _DN*DSLITRK_<br>_DNVN*CSGVYE<br>HEP<br>LEIGK_                                                                                                                    | 133.25 | 120.32     | 1056200000     | 185220000      | 5.7  |
| _DSVIN*LSESV<br>EDGP<br>R_                                                                                                                                       | 166.16 | 148.52     | 278150000      | 51637000       | 5.4  |
| _DSYPDGN*ITW<br>YRN<br>*GK_                                                                                                                                      | 59.579 | 37.477     | 14350000       | 3577100        | 4.0  |
| _DTLSIN*ATNIK_<br>_DTTGSHTFQGM<br>FGC<br>EITNN*R_                                                                                                                | 127.32 | 144.8      | 56682000       | 35977000       | 1.6  |
| _DVGSGTTN*N*<br>SQA<br>CAQFLEQYFHN*<br>SDL<br>TEFMR_                                                                                                             | 150.09 | 118.77     | 337610000      | 402350000      | 0.8  |
| _DYRPSAGN*N*<br>SLY<br>QDTVVK_                                                                                                                                   | 268.73 | 163.66     | 571690000      | 244500000      | 2.3  |
| _DYYLN*KTENEK_<br>_DYYPIN*ESL<br>ASLPL<br>R_                                                                                                                     | 188.1  | 76.704     | 156300000      | 16267000       | 9.6  |
| _EAFN*ETNQAI<br>QTIS<br>R_                                                                                                                                       | 255.7  | 200.47     | 962660000      | 165520000      | 5.8  |
| _EALNQAVN*TTR_<br>_EAQYN*STFR_<br>_EASN*HSSGAG<br>LVQI<br>NK_                                                                                                    | 174.02 | 156.15     | 1092300000     | 440560000      | 2.5  |
| _EATIVGEN*ET<br>YPR_<br>_EEQFN*STFR_<br>_EGASEEETN*<br>LSK_<br>_EGICN*GFTAL<br>CPAS<br>DPKPN*FTDCNR_<br>_EGLALIN*GTQ<br>MITS<br>LGCEALER_<br>_EGN*CSAQSG<br>LAWQ | 248.05 | 240.21     | 560470000      | 135800000      | 4.1  |
| 216.46                                                                                                                                                           | 238.47 | 199350000  | 144200000      | 1.4            |      |
| 194.43                                                                                                                                                           | 145.41 | 292930000  | 42099000       | 7.0            |      |
| 183.47                                                                                                                                                           | 160.59 | 342970000  | 92633000       | 3.7            |      |
| 267.34                                                                                                                                                           | 252.73 | 1270800000 | 294090000      | 4.3            |      |
| 188.91                                                                                                                                                           | 179.67 | 934150000  | 452610000      | 2.1            |      |
| 243.03                                                                                                                                                           | 186.16 | 2319300000 | 110880000<br>0 | 2.1            |      |
| 93.011                                                                                                                                                           | 64.65  | 53183000   | 16179000       | 3.3            |      |
| 88.79                                                                                                                                                            | 77.641 | 20682000   | 32236000       | 0.6            |      |
| 137.09                                                                                                                                                           | 62.611 | 88820000   | 6740000        | 13.2           |      |
| 188.48                                                                                                                                                           | 136.91 | 909880000  | 123720000      | 7.4            |      |

|                                    |        |        |            |                |      |
|------------------------------------|--------|--------|------------|----------------|------|
| DCDFKDAEEAATGEC                    |        |        |            |                |      |
| TATVGKR_                           |        |        |            |                |      |
| _EGN*FTSTFDKK_                     | 107.85 | 58.754 | 61916000   | 19391000       | 3.2  |
| _EILVHPN*YTR_                      | 112.36 | 136.63 | 213630000  | 31542000       | 6.8  |
| _ELGAIYN*CSNLAQ<br>DLEK_           | 105.9  | 96.544 | 26586000   | 17692000       | 1.5  |
| _ELLVDELLSN*SSTL<br>ASYK_          | 86.479 | 61.815 | 18010000   | 8571500        | 2.1  |
| _ELN*ISICPVSQTSER<br>_             | 177.84 | 185.12 | 440990000  | 224570000      | 2.0  |
| _EN*ISDPTSPLRR_                    | 157.42 | 97.734 | 378920000  | 78389000       | 4.8  |
| _EN*MTFGSTLV<br>TNP<br>K_          | 83.692 | 59.709 | 104020000  | 5615500        | 18.5 |
| _EQN*YTCR_                         | 150.02 | 135.35 | 103170000  | 24934000       | 4.1  |
| _EQVTVIN*R_                        | 159.04 | 179.73 | 134480000  | 33517000       | 4.0  |
| _ESGIQN*VSTCR_                     | 252.42 | 237.93 | 4766900000 | 163610000<br>0 | 2.9  |
| _ESN*STSLTQAALLE<br>K_             | 99.566 | 166.6  | 269800000  | 182590000      | 1.5  |
| _ESQTIGDQCVYN*ST<br>HLGFQR_        | 116.82 | 82.367 | 311380000  | 98906000       | 3.1  |
| _ETLVTLFDN*R_                      | 144.65 | 148.32 | 15706000   | 31629000       | 0.5  |
| _EVN*SQLDN*N*GCS<br>TQEVN*ITELQSK_ | 220.48 | 105.31 | 1448500000 | 31184000       | 46.5 |
| _EVN*SQLDN*N*GCS<br>TQEVN*ITELQSK_ | 220.48 | 66.383 | 1505000000 | 91700000       | 16.4 |
| _EYEGAVYPD<br>N*TTD<br>FQR_        | 202.4  | 209.39 | 924170000  | 601050000      | 1.5  |
| _FCNIVPTEHCFLGN*<br>GTEYR_         | 106.16 | 115.15 | 46343000   | 11161000       | 4.2  |
| _FFN*FSWR_                         | 162.51 | 132.09 | 104790000  | 9062800        | 11.6 |
| _FGTCSQLCN*N*TK_                   | 245.58 | 244.95 | 1437200000 | 406560000      | 3.5  |
| _FIN*YN*QTVSR_                     | 175.93 | 198.61 | 1512000000 | 768670000      | 2.0  |
| _FQISPQLQFSPEEVL<br>GMVLN*YSR_     | 290.71 | 237.01 | 482460000  | 346070000      | 1.4  |
| _FQLLN*FSSSELK_                    | 103.88 | 132.59 | 496130000  | 175590000      | 2.8  |
| _FQN*FSMATDQR_                     | 144.17 | 116.55 | 178340000  | 21188000       | 8.4  |
| _FSDGLESN*R_                       | 182.98 | 182.98 | 642390000  | 106440000      | 6.0  |
| _FSGAN*DTDFR_                      | 119.53 | 131.09 | 54521000   | 38483000       | 1.4  |
| _FSTELGYN*GTR_                     | 150.04 | 104.07 | 187820000  | 31188000       | 6.0  |
| _FTAPDTLFAN*GSVY<br>PPNEGFCPCR_    | 180.13 | 172    | 1327300000 | 526510000      | 2.5  |
| _FTCN*QTDTVIIH<br>SK<br>_          | 149.59 | 88.311 | 1290100000 | 127180000      | 10.1 |

|                                                                                           |        |        |            |                |           |
|-------------------------------------------------------------------------------------------|--------|--------|------------|----------------|-----------|
| _FTFTHTPGDHQICL<br>HSN*STR_                                                               | 256.13 | 72.644 | 2956100000 | 84093000       | 35.2      |
| _FTFTHTPGEHQICL<br>HSN*STK_                                                               | 264.91 | 70.99  | 3745200000 | 11919000       | 314.<br>2 |
| _FVN*STGYLTEAEK_<br>_GAGEVSPAEHSSKPT<br>N*ISAK_                                           | 96.734 | 84.566 | 85767000   | 15052000       | 5.7       |
| _GATN*NTCIIR_<br>_GCIWEASN*TTR_<br>_GDHGAN*FSCR_<br>_GDPSIISVN*GTDFTF<br>R_               | 141.12 | 56.533 | 551220000  | 13716000       | 40.2      |
| _GDTHTQILEGLQFN*<br>LTQTSEADIHK_                                                          | 176.38 | 178.22 | 93346000   | 40669000       | 2.3       |
| _GECYYTN*GTQR_<br>_GELQSEN*SSLTLSSS<br>NR_                                                | 124.67 | 117.14 | 94219000   | 44794000       | 2.1       |
| _GHVDPAN*DTFDIDP<br>R_                                                                    | 88.056 | 48.004 | 45505000   | 3532400        | 12.9      |
| _GIAN*LSNFIR_<br>_GLN*LTEDTYKPR_<br>_GLNCN*LSR_<br>_GLSPGN*YSVR_<br>_GN*ITEYQCHQYITK<br>_ | 65.716 | 59.261 | 11295000   | 8424400        | 1.3       |
| _GN*TTAIDKEIAR_                                                                           | 244.95 | 188.69 | 3037300000 | 102680000<br>0 | 3.0       |
| _GQTQN*YSTLLLEEA<br>SER_                                                                  | 124.67 | 96.113 | 128670000  | 36437000       | 3.5       |
| _GRADECALPYLGAT<br>CYCDLFCN*R_                                                            | 196.64 | 205.68 | 180050000  | 104800000      | 1.7       |
| _GSEVEDEDLELFN*T<br>SVQLRPPSTAPGPETA<br>AFIER_                                            | 97.417 | 68.044 | 69321000   | 2856100        | 24.3      |
| _GSN*FTAICVLK_<br>_GSPGN*ASQGSIH<br>LH<br>SPQLALQADPR_                                    | 198.58 | 183.47 | 8418700    | 6903900        | 1.2       |
| _GTDN*ITVR_<br>_GTTN*TTSAGVPCQ<br>R_                                                      | 183.08 | 184.88 | 555580000  | 142680000      | 3.9       |
| _GVDVSQVTWQSQG<br>DTPCSCCIVN*N*SN*<br>GSR_                                                | 93.992 | 58.981 | 16322000   | 6600000        | 2.5       |
| _GVDVSQVTWQSQG                                                                            | 159.79 | 159.79 | 63449000   | 10721000       | 5.9       |
|                                                                                           | 112.24 | 103.39 | 326500000  | 94638000       | 3.4       |
|                                                                                           | 206.1  | 222.25 | 4792600000 | 131960000<br>0 | 3.6       |
|                                                                                           | 141    | 106.93 | 27619000   | 40042000       | 0.7       |
|                                                                                           | 134.66 | 55.247 | 49564000   | 10988000       | 4.5       |
|                                                                                           | 260.66 | 147.5  | 103800000  | 5029000        | 20.6      |
|                                                                                           | 58.511 | 66.267 | 28787000   | 47847000       | 0.6       |
|                                                                                           | 79.395 | 66.853 | 1513000000 | 184310000      | 8.2       |
|                                                                                           | 137.9  | 71.379 | 24566000   | 3357100        | 7.3       |
|                                                                                           | 129.54 | 84.566 | 133140000  | 34828000       | 3.8       |
|                                                                                           | 108.57 | 66.383 | 39959000   | 91700000       | 0.4       |
|                                                                                           | 179.47 | 200.36 | 1001300000 | 185820000      | 5.4       |

|                   |        |        |             |           |      |
|-------------------|--------|--------|-------------|-----------|------|
| DTPCSCCIVN*N*SN*  |        |        |             |           |      |
| GSR_              |        |        |             |           |      |
| _GVFITN*ETGQPLIG  | 86.944 | 94.728 | 399700000   | 91965000  | 4.3  |
| K_                |        |        |             |           |      |
| _GVSSSEN*FTSPVME  | 219.97 | 139.04 | 473460000   | 46941000  | 10.1 |
| FWER_             |        |        |             |           |      |
| _GVTHLN*ISGLK_    | 173.72 | 142.12 | 510070000   | 96531000  | 5.3  |
| _GVVDSDDLPLN*VS   | 131.53 | 82.102 | 21100000    | 15970000  | 1.3  |
| R_                |        |        |             |           |      |
| _GWLN*GSLVGFYK_   | 110.86 | 123.8  | 218960000   | 33464000  | 6.5  |
| _GYLTSFEMFN*STFK  | 152.74 | 115.78 | 358740000   | 77351000  | 4.6  |
| -                 |        |        |             |           |      |
| _GYN*SSQDLPSLVLD  | 64.507 | 39.237 | 105410000   | 14876000  | 7.1  |
| FK_               |        |        |             |           |      |
| _HAN*WTLTPLK_     | 166.97 | 196.48 | 788840000   | 223550000 | 3.5  |
| _HFN*DSGACVPR_    | 96.113 | 45.829 | 20363000    | 5143800   | 4.0  |
| _HLEN*ATASVSEAE   | 199.58 | 146.1  | 819420000   | 60209000  | 13.6 |
| RK_               |        |        |             |           |      |
| _HN*LTITQGK_      | 187.99 | 117.67 | 205220000   | 44328000  | 4.6  |
| _HNN*DTQHIWESDS   | 207.17 | 190.63 | 735930000   | 305950000 | 2.4  |
| NEFSVIADPR_       |        |        |             |           |      |
| _HYAN*ITN*GMYR_   | 249.83 | 88.338 | 2889400000  | 185280000 | 15.6 |
| _IAN*ETGGHSGPR_   | 147.33 | 122.45 | 438330000   | 80561000  | 5.4  |
| _IAN*FSQSCTLYSGD  | 158.94 | 131.57 | 599300000   | 271330000 | 2.2  |
| DLVEALPKPCPGCPR_  |        |        |             |           |      |
| _IAPASN*VSHTVVLR  | 239.58 | 239.58 | 13990000000 | 280130000 | 5.0  |
| PLK_              |        |        |             | 0         |      |
| _IAQEGGAAALLIAN*  | 76.417 | 34.437 | 11868000    | 9527700   | 1.2  |
| NSVLIPSSR_        |        |        |             |           |      |
| _IASAVQKN*ATSTK_  | 152.99 | 74.475 | 132290000   | 12954000  | 10.2 |
| _IDCYPDEHGASEAN*  | 148.56 | 85.808 | 246490000   | 13604000  | 18.1 |
| CSAR_             |        |        |             |           |      |
| _IDSTGN*VTN*ELR_  | 185.25 | 184.44 | 175640000   | 81734000  | 2.1  |
| _IEAVLPAEFFEVLSSS | 197.31 | 110.26 | 409340000   | 26957000  | 15.2 |
| QN*GSYHHIR_       |        |        |             |           |      |
| _IEGLTN*ETYR_     | 161.17 | 188.04 | 249040000   | 148560000 | 1.7  |
| _IETILLN*GTDRK_   | 164.64 | 179.67 | 156480000   | 63608000  | 2.5  |
| _IFIFN*QTGIEAK_   | 105.25 | 82.362 | 103330000   | 18002000  | 5.7  |
| _IGCFALSEPGN*GSD  | 43.803 | 61.583 | 19706000    | 23461000  | 0.8  |
| AGAASTTAREEGDS    |        |        |             |           |      |
| WVLN*GTK_         |        |        |             |           |      |
| _IGCFALSEPGN*GSD  | 43.803 | 62.302 | 19706000    | 37672000  | 0.5  |
| AGAASTTAREEGDS    |        |        |             |           |      |
| WVLN*GTK_         |        |        |             |           |      |

|                                                   |        |        |            |                |           |
|---------------------------------------------------|--------|--------|------------|----------------|-----------|
| _IGPGEPLLELLCN*VS<br>GALPPPGR_                    | 56.708 | 41.711 | 6366200    | 981190         | 6.5       |
| _IIDLIPDGYPQISCLP<br>KEEN*ATIATYPEFGV<br>LDLK_    | 92.679 | 66.461 | 1827700000 | 109370000      | 16.7      |
| _IISPEEN*VTLTCTA<br>ENQLER_                       | 246.68 | 207.82 | 1049000000 | 701030000      | 1.5       |
| _IISAN*GCKVDNSSL<br>TGESEPQTR_                    | 60.939 | 103.27 | 30080000   | 25151000       | 1.2       |
| _ILCDNSDN*ITR_                                    | 67.456 | 62.924 | 25445000   | 2553400        | 10.0      |
| _ILDIYHQEACN*GCII<br>SVGGQIPN*N*LAVPL<br>YKN*GVK_ | 154.88 | 150.26 | 9973800000 | 430850000<br>0 | 2.3       |
| _ILN*ETLYENAK_                                    | 147.62 | 119.27 | 135560000  | 67942000       | 2.0       |
| _IMESHPN*GTFSAK_                                  | 174.37 | 59.185 | 1150000000 | 10119000       | 113.<br>6 |
| _IN*N*GGCQDLCLLT<br>HQGHVN*CSCR_                  | 162.85 | 119.06 | 323960000  | 37965000       | 8.5       |
| _IN*TTSDEKDPTNPF<br>R_                            | 160.27 | 82.908 | 60527000   | 17612000       | 3.4       |
| _IN*VSYTGERPSSN*<br>MVIVDVK_                      | 152.09 | 64.723 | 2556800000 | 45345000       | 56.4      |
| _IN*YTCN*QGYR_                                    | 161.63 | 180.8  | 1070000000 | 406820000      | 2.6       |
| _IQ*CVDGN*WTTLPV<br>CIEER_                        | 165.71 | 181.4  | 146410000  | 89181000       | 1.6       |
| _ISASGAELEALEAQV<br>LN*LSLK_                      | 120.56 | 71.535 | 201810000  | 4607700        | 43.8      |
| _ISWPSNVN*GSHR_                                   | 145.28 | 62.924 | 68562000   | 2057300        | 33.3      |
| _ITDIEN*GTFANIPR_                                 | 190.1  | 186.13 | 113310000  | 41894000       | 2.7       |
| _ITN*GTVGVR_                                      | 131.06 | 135.79 | 198610000  | 53026000       | 3.7       |
| _ITVVYAEN*GTVLQ*<br>GTTVASVYK_                    | 132.45 | 80.752 | 132970000  | 15896000       | 8.4       |
| _IVDVN*LTSEGK_                                    | 162.26 | 162.26 | 1169000000 | 829420000      | 1.4       |
| _IVN*GTLTK_                                       | 74.92  | 91.069 | 197600000  | 41161000       | 4.8       |
| _KEDSCQLN*YSEGPC<br>LGMQER_                       | 231.93 | 169.25 | 322960000  | 29892000       | 10.8      |
| _KEN*SSEICSN*N*GE<br>CVCGQCVCR_                   | 235.26 | 178.43 | 573840000  | 43163000       | 13.3      |
| _KEN*SSYQVINWR_                                   | 164.9  | 166.97 | 920490000  | 213830000      | 4.3       |
| _KFPVPFQKEN*VTAT<br>LVELGR_                       | 183.65 | 186.58 | 8822600000 | 558410000<br>0 | 1.6       |
| _KILASPN*EEN*MTE<br>LISMR_                        | 228.39 | 225.67 | 1556600000 | 138680000      | 11.2      |
| _KLN*YTLK_                                        | 150.88 | 128.61 | 364900000  | 39202000       | 9.3       |



|                                     |        |        |            |                |      |
|-------------------------------------|--------|--------|------------|----------------|------|
| _KLNLDGSN*YTLLK_                    | 177.88 | 143.93 | 426660000  | 123610000      | 3.5  |
| _KN*ITDLVEGAK_                      | 112.02 | 63.602 | 63448000   | 13666000       | 4.6  |
| _KVPSN*STETVIESD<br>QFQPGVR_        | 121.63 | 123.83 | 159910000  | 78594000       | 2.0  |
| _LACLN*GTVLR_                       | 218.55 | 199.46 | 511840000  | 309040000      | 1.7  |
| _LAN*ISGEEQK_                       | 107.83 | 57.836 | 14584000   | 5618100        | 2.6  |
| _LAVTN*TTMTGTVL<br>K_               | 140.08 | 126.63 | 523980000  | 80620000       | 6.5  |
| _LDAPTNLQFVN*ET<br>DR_              | 209.39 | 224.34 | 1268600000 | 730480000      | 1.7  |
| _LDETDCLGN*WTW<br>QEGSQQTLK_        | 151.63 | 125.28 | 156730000  | 136190000      | 1.2  |
| _LDFIVLN*ETR_                       | 237.08 | 210.64 | 2784300000 | 730760000      | 3.8  |
| _LDLPVN*TSIPN*VTE<br>IK_            | 68.516 | 48.883 | 166990000  | 23144000       | 7.2  |
| _LDLPVN*TSIPN*VTE<br>IK_            | 67.283 | 290.5  | 91186000   | 934920000<br>0 | 0.0  |
| _LDN*YSTQELGR_                      | 162.72 | 115.29 | 317840000  | 100280000      | 3.2  |
| _LDPPCTN*TTAPSNY<br>LNNPYVR_        | 266.64 | 265.07 | 626170000  | 537690000      | 1.2  |
| _LDWLGN*CSGLNDD<br>SYGYR_           | 287.55 | 224.86 | 2103200000 | 346450000      | 6.1  |
| _LEN*LSSTESGYTAT<br>LTR_            | 134.93 | 149.09 | 151200000  | 84605000       | 1.8  |
| _LFQN*CELYK_                        | 87.298 | 87.298 | 101680000  | 51688000       | 2.0  |
| _LGACN*DTLK_                        | 82.749 | 108.43 | 774450000  | 257230000      | 3.0  |
| _LGAIN*STLSN*ESK_                   | 153.39 | 165.45 | 301950000  | 207690000      | 1.5  |
| _LGAIN*STLSNESK_                    | 153.39 | 119.01 | 376640000  | 99492000       | 3.8  |
| _LGALN*NSLLLLLEDR<br>_              | 211.06 | 161.63 | 231060000  | 56324000       | 4.1  |
| _LGGWN*ITGPWAK_                     | 97.779 | 126.48 | 240110000  | 60656000       | 4.0  |
| _LGN*ETLQR_                         | 152.63 | 153.04 | 131870000  | 36679000       | 3.6  |
| _LGVIEDHSN*R_                       | 123.63 | 67.726 | 7352400    | 6972000        | 1.1  |
| _LHVAQPEN*DSHVA<br>LLK_             | 103.88 | 63.128 | 494990000  | 27614000       | 17.9 |
| _LIASN*ITETMR_                      | 152.69 | 144.17 | 738700000  | 308740000      | 2.4  |
| _LLEFDSTN*ASEGAQ<br>*PPGKPYPPYSLAK_ | 75.226 | 90.633 | 91003000   | 60146000       | 1.5  |
| _LLLTAAPN*LTTSPA<br>FR_             | 143.93 | 125.73 | 342610000  | 101810000      | 3.4  |
| _LLN*QTLR_                          | 191.03 | 175.75 | 1020800000 | 225730000      | 4.5  |
| _LLPAFN*TTSGLPYP<br>R_              | 127.76 | 92.939 | 26987000   | 15181000       | 1.8  |
| _LLQQSN*QSSQFLH                     | 165.45 | 93.152 | 98807000   | 8295000        | 11.9 |

|                   |        |        |            |           |      |
|-------------------|--------|--------|------------|-----------|------|
| SVER_             |        |        |            |           |      |
| _LLQVVYLHSN*N*IT  | 85.287 | 91.207 | 69384000   | 32735000  | 2.1  |
| K_                |        |        |            |           |      |
| _LMNAPLYLAEWQN*   | 87.647 | 57.52  | 130700000  | 5916700   | 22.1 |
| ITK_              |        |        |            |           |      |
| _LN*ASIADLQSK_    | 160.86 | 149.41 | 33540000   | 53250000  | 0.6  |
| _LN*FTGPGEPDSLR_  | 60.364 | 91.62  | 14463000   | 9294000   | 1.6  |
| _LN*GTDPIVAADSKR  | 220.97 | 161.21 | 1758300000 | 189420000 | 9.3  |
| -                 |        |        |            |           |      |
| _LN*LSEGEVAATVK_  | 89.46  | 65.805 | 31723000   | 18158000  | 1.7  |
| _LN*LTAFAQLSQLEGL | 209.31 | 123.14 | 173080000  | 46910000  | 3.7  |
| LQAR_             |        |        |            |           |      |
| _LN*LTEEEK_       | 157.86 | 157.86 | 709330000  | 168360000 | 4.2  |
| _LN*LTTDPK_       | 111.95 | 114.89 | 125890000  | 44217000  | 2.8  |
| _LN*MTLPDALVPTFS  | 135.26 | 74.338 | 3556100000 | 71183000  | 50.0 |
| ISN*HSLK_         |        |        |            |           |      |
| _LN*MTLPDALVPTFS  | 135.26 | 87.963 | 3514600000 | 214400000 | 16.4 |
| ISN*HSLK_         |        |        |            |           |      |
| _LN*N*SQIK_       | 134.06 | 145.04 | 1072700000 | 128990000 | 8.3  |
| _LN*VTSPDLFR_     | 171.85 | 118.4  | 40746000   | 32894000  | 1.2  |
| _LPPLNIGEVLTLP    | 105.73 | 76.198 | 59902000   | 7040200   | 8.5  |
| EA                |        |        |            |           |      |
| NFPSFSLPNCN*R_    |        |        |            |           |      |
| _LQLLN*LSR_       | 162.25 | 161.02 | 9406300    | 4502200   | 2.1  |
| _LQTPLN*YTEFQKPI  | 85.231 | 47.485 | 68079000   | 51486000  | 1.3  |
| CLPSK_            |        |        |            |           |      |
| _LRN*ATITQALTNK_  | 186.94 | 113.52 | 312270000  | 46921000  | 6.7  |
| _LSALDN*LLN*HSSIF | 224.64 | 67.648 | 1725300000 | 38396000  | 44.9 |
| LK_               |        |        |            |           |      |
| _LSQALGN*ITVVQK_  | 77.527 | 63.185 | 111720000  | 40713000  | 2.7  |
| _LSSPN*VTISCK_    | 127.56 | 100.55 | 449730000  | 116850000 | 3.8  |
| _LTEFTHN*STMDYK_  | 179.46 | 88.101 | 382060000  | 16911000  | 22.6 |
| _LTGSAGN*YTVCQK   | 99.531 | 68.809 | 51113000   | 7056500   | 7.2  |
| -                 |        |        |            |           |      |
| _LTSCATN*ASMCGD   | 234.22 | 172.91 | 1372400000 | 509390000 | 2.7  |
| EAR_              |        |        |            |           |      |
| _LTVPSSQN*SSFR_   | 164.9  | 174.84 | 180740000  | 72539000  | 2.5  |
| _LTWSN*AN*GTASY   | 182.23 | 80.96  | 58729000   | 14652000  | 4.0  |
| R_                |        |        |            |           |      |
| _LTYN*ESR_        | 160.03 | 145.04 | 1484900000 | 243870000 | 6.1  |
| _LVTQTIPCN*K_     | 132.88 | 140.16 | 1311200000 | 381620000 | 3.4  |
| _LWDPSSHPGIQN*IS  | 155.98 | 180.48 | 417960000  | 174780000 | 2.4  |
| R_                |        |        |            |           |      |
| _LWLPVN*LTWADLE   | 241.93 | 79.97  | 1304900000 | 23188000  | 56.3 |
| DKDGR_            |        |        |            |           |      |

|                  |        |        |            |           |      |
|------------------|--------|--------|------------|-----------|------|
| _LYWISSGN*HTINR_ | 203.11 | 125.82 | 883700000  | 129570000 | 6.8  |
| _MALLQYGSQN*QQQ  |        |        |            |           |      |
| VAFPLTYN*VTIHEA  | 156.72 | 68.516 | 419820000  | 10407000  | 40.3 |
| LER_             |        |        |            |           |      |
| _MFSQN*DTR_      | 138.54 | 88.921 | 116190000  | 27009000  | 4.3  |
| _MIEN*GSLFLPTLR_ | 156.24 | 169.04 | 895660000  | 193610000 | 4.6  |
|                  |        |        |            | 213980000 |      |
| _MTLSQN*N*SILR_  | 219.03 | 245.76 | 6206000000 | 0         | 2.9  |
| _N*ATLVN*EADKLR_ | 218.75 | 102.97 | 552660000  | 32248000  | 17.1 |
| _N*ATSYPPMCFQDP  |        |        |            |           |      |
| VTGQIVNDLLTNRK_  | 182.39 | 100.88 | 336750000  | 32119000  | 10.5 |
| _N*ATTYPPMCSQDA  |        |        |            |           |      |
| AR_              | 181.71 | 113.4  | 3489100000 | 274260000 | 12.7 |
| _N*CSTQHFPR_     | 162.88 | 54.982 | 115560000  | 3061100   | 37.8 |
| _N*ETHSICSACDESC |        |        |            |           |      |
| K_               | 137.19 | 80.632 | 129070000  | 7860700   | 16.4 |
| _N*GN*MSGISDQR_  | 97.734 | 52.693 | 3322200    | 5888200   | 0.6  |
| _N*LIN*DYVSN*QTQ |        |        |            | 356650000 |      |
| GMIK_            | 206.2  | 226.19 | 7336600000 | 0         | 2.1  |
| _N*LTSPVGVQPILNE |        |        |            |           |      |
| HTFCAGLTK_       | 115.36 | 107.74 | 473620000  | 287170000 | 1.6  |
| _N*MTLFSDLVAEK_  | 125.54 | 94.122 | 314550000  | 71003000  | 4.4  |
| _N*MVLQN*GTK_    | 128.6  | 98.048 | 1614900000 | 301100000 | 5.4  |
| _N*PCNITREDYAPLV |        |        |            |           |      |
| K_               | 86.539 | 74.678 | 25906000   | 5251300   | 4.9  |
| _N*QTLQEGEK_     | 161.63 | 73.985 | 125280000  | 3909700   | 32.0 |
| _N*SSITLPADSR_   | 126.71 | 61.375 | 52917000   | 6327300   | 8.4  |
| _N*STIQAANLAGLK_ | 311.76 | 62.088 | 232890000  | 58893000  | 4.0  |
| _N*STLCDLCIGPLK_ | 182.53 | 230.91 | 3453400000 | 839710000 | 4.1  |
| _N*TTHLLQR_      | 141.2  | 121.05 | 118640000  | 18166000  | 6.5  |
| _N*TTISVHPSTR_   | 138.99 | 69.451 | 73300000   | 1997800   | 36.7 |
| _N*VALVAGDTGN*A  |        |        |            |           |      |
| TGLGEQGPTR_      | 215.98 | 169.84 | 150320000  | 107090000 | 1.4  |
| _N*VTYGTYLDDPDP  |        |        |            |           |      |
| DDGFNYK_         | 115.32 | 89.846 | 131710000  | 16755000  | 7.9  |
| _N*YN*FTLACNTK_  | 201.48 | 186.74 | 1672000000 | 805840000 | 2.1  |
| _NAN*CSTVSPGQTQ  |        |        |            |           |      |
| CTCQK_           | 138.91 | 47.082 | 113260000  | 7025200   | 16.1 |
| _NAVN*CTYKNEDDC  |        |        |            |           |      |
| VVR_             | 179.39 | 78.326 | 178960000  | 19322000  | 9.3  |
| _NIGN*TSEGPR_    | 185.6  | 135.86 | 130610000  | 31033000  | 4.2  |
| _NILPN*ITTSYLK_  | 81.431 | 83.617 | 190060000  | 130720000 | 1.5  |
| _NIN*SSCRPHPGAWL |        |        |            |           |      |
| R_               | 180.95 | 102.5  | 2068800000 | 74657000  | 27.7 |

|                                    |        |        |             |                |      |
|------------------------------------|--------|--------|-------------|----------------|------|
| _NIQAVNEIATLSQC<br>N*DTSSAAMVQCLR_ | 254.25 | 93.397 | 1472900000  | 57307000       | 25.7 |
| _NLFLN*HSETASAK_                   | 162.94 | 207.04 | 2245000000  | 642320000      | 3.5  |
| _NLN*YTER_                         | 157.9  | 127.84 | 98397000    | 17938000       | 5.5  |
| _NPCN*ITR_                         | 161.48 | 111.65 | 888420000   | 135750000      | 6.5  |
| _NPN*GTVTVISR_                     | 124.42 | 98.156 | 187790000   | 32756000       | 5.7  |
| _NPN*N*NTIHPNLR_                   | 240.41 | 184.03 | 2456600000  | 462220000      | 5.3  |
| _NTN*SSN*N*LTR_                    | 200.71 | 167.09 | 101580000   | 85417000       | 1.2  |
| _NTN*SSNN*LTR_                     | 200.71 | 167.09 | 101580000   | 85417000       | 1.2  |
| _NTQADVIN*ASWSV<br>LSN*STR_        | 163.45 | 109.28 | 157520000   | 49215000       | 3.2  |
| _NTQADVIN*ASWSV<br>LSN*STR_        | 163.45 | 109.28 | 157520000   | 57351000       | 2.7  |
| _NVN*ISYIVN*DSFFP<br>QRPEK_        | 158.98 | 226.65 | 243930000   | 923590000      | 0.3  |
| _NVN*ISYIVNDSFFP<br>QRPEK_         | 307.02 | 185.33 | 3838800000  | 154680000      | 24.8 |
| _NVN*ISYTVN*DSFF<br>PQRPOK_        | 207.53 | 231.91 | 1626900000  | 844620000      | 1.9  |
| _NYTAN*ATSSR_                      | 171.68 | 101.38 | 89044000    | 8993100        | 9.9  |
| _QELN*DSLQVAER_                    | 203.11 | 224.24 | 598260000   | 281660000      | 2.1  |
| _QELSQDN*ATLK_                     | 139.32 | 116.84 | 39600000    | 57171000       | 0.7  |
| _QFWIFDVQNPDDVA<br>KN*SSK_         | 172.66 | 132.62 | 179440000   | 62498000       | 2.9  |
| _QGN*YSAGLPR_                      | 111.06 | 70.977 | 39134000    | 16166000       | 2.4  |
| _QIN*ITCDNPVDR_                    | 149.23 | 71.268 | 76320000    | 11791000       | 6.5  |
| _QLFFN*GTETLR_                     | 104.07 | 81.525 | 154470000   | 83088000       | 1.9  |
| _QLLAN*SSALEETIL<br>GHQGR_         | 117.67 | 61.648 | 129940000   | 6192000        | 21.0 |
| _QN*FSN*LTVSTEDQ<br>VK_            | 196.67 | 191.57 | 2682000000  | 106010000<br>0 | 2.5  |
| _QN*FSN*LTVSTEDQ<br>VK_            | 196.67 | 191.57 | 2682000000  | 106010000<br>0 | 2.5  |
| _QN*GTDNSPSQR_                     | 86.313 | 66.262 | 11216000    | 980660         | 11.4 |
| _QN*TTWQAGR_                       | 84.615 | 65.347 | 22679000    | 7061000        | 3.2  |
| _QPNMN*LTQLK_                      | 77.379 | 45.307 | 218040000   | 55532000       | 3.9  |
| _QRYN*LTAK_                        | 133.57 | 149.57 | 559290000   | 48138000       | 11.6 |
| _QSLNTVN*DTVWK_                    | 109.96 | 64.224 | 63920000    | 49666000       | 1.3  |
| _QSN*GSIAVISSLAG<br>K_             | 134.25 | 158.89 | 10676000000 | 891690000<br>0 | 1.2  |
| _QTGDVTCN*CTDGR                    | 200.98 | 185.9  | 751340000   | 249670000      | 3.0  |
| _QTQVGIVQYGAN*V<br>THEFNLNK_       | 87.554 | 90.765 | 286610000   | 92383000       | 3.1  |

|                                             |        |        |            |           |      |
|---------------------------------------------|--------|--------|------------|-----------|------|
| _QVSTLIN*NTDK_                              | 171.92 | 171.62 | 490130000  | 194780000 | 2.5  |
| _RGPECSQN*YTAPTG<br>VIK_                    | 113.33 | 69.935 | 74499000   | 15867000  | 4.7  |
| _RGTFTDCALAN*MT<br>QQIR_                    | 285.06 | 178.68 | 1907500000 | 510090000 | 3.7  |
| _RIPAIN*R_                                  | 143.02 | 80.462 | 48311000   | 2433400   | 19.9 |
| _RN*FTAADWGHRSR_                            | 190.57 | 65.043 | 708930000  | 12066000  | 58.8 |
| _RN*WTETEV_                                 | 222.3  | 121.36 | 346860000  | 44737000  | 7.8  |
| _RN*WTINR_                                  | 182.68 | 155.75 | 306110000  | 41995000  | 7.3  |
| _RPFVGVYEMEVDTL<br>ETTCHALDPTPLAN*<br>CSVR_ | 239.24 | 130.41 | 676330000  | 43284000  | 15.6 |
| _SAEGTFFIN*K_                               | 78.655 | 90.108 | 121690000  | 95559000  | 1.3  |
| _SCIN*ESAIDSR_                              | 138.75 | 148.28 | 156010000  | 73996000  | 2.1  |
| _SCVAITDAFPQN*MS<br>R_                      | 179.39 | 113.59 | 257140000  | 72463000  | 3.5  |
| _SDIN*CSVMEATEEK<br>_                       | 166.38 | 111.74 | 78315000   | 38853000  | 2.0  |
| _SDLNPAN*GSYPFQA<br>LHQR_                   | 174.95 | 103.04 | 273960000  | 10522000  | 26.0 |
| _SFDCCGLFN*LTTLR<br>_                       | 157.22 | 82.069 | 265910000  | 3522000   | 75.5 |
| _SGQEDHYWLDVEK<br>N*QSAK_                   | 212.21 | 100.67 | 2162200000 | 178220000 | 12.1 |
| _SLGEVN*FTATAEAL<br>QSPCLCGNK_              | 257.22 | 168.78 | 451110000  | 176960000 | 2.5  |
| _SLGQFLSTEN*ATIK_                           | 50.158 | 86.413 | 27801000   | 36352000  | 0.8  |
| _SLN*CTVK_                                  | 122.74 | 127.12 | 337170000  | 34047000  | 9.9  |
| _SLPVN*DSVLDVFER<br>_                       | 104.17 | 37.77  | 38743000   | 4176900   | 9.3  |
| _SLTQGSIVGNLAPV<br>N*GTSQ GK_               | 168.3  | 184.35 | 1109100000 | 562170000 | 2.0  |
| _SN*DSVLEPANR_                              | 176.42 | 199.09 | 157670000  | 54928000  | 2.9  |
| _SN*ISILR_                                  | 163.62 | 152.47 | 481090000  | 130100000 | 3.7  |
| _SN*VTRPSEFNWI<br>APIPFLK_                  | 74.048 | 49.089 | 33724000   | 11745000  | 2.9  |
| _SPGAQDN*VSVSQG<br>MR_                      | 332.06 | 132.84 | 1018900000 | 171590000 | 5.9  |
| _SQLTISNLDVN*VDP<br>GTIVCN*ATN*AQGT<br>TR_  | 189.78 | 200.13 | 476980000  | 195210000 | 2.4  |
| _SSAN*QSEFQQIQK<br>_                        | 213.82 | 234.52 | 418120000  | 147040000 | 2.8  |
| _SSHLPPSSYFN*AS                             | 227.47 | 207.31 | 737960000  | 393860000 | 1.9  |

|                     |        |        |            |           |      |
|---------------------|--------|--------|------------|-----------|------|
| GR_                 |        |        |            |           |      |
| _SSTEN* TSAELHVLG   | 157.75 | 111.74 | 264030000  | 12753000  | 20.7 |
| R_                  |        |        |            |           |      |
| _SVLEN* TTSYEEAKN   | 146.5  | 136.2  | 1164100000 | 485280000 | 2.4  |
| TLTK_               |        |        |            |           |      |
| _SVYN* CSGEACSGH    | 249.66 | 131.35 | 429230000  | 63156000  | 6.8  |
| NR_                 |        |        |            |           |      |
| _SWSTVGN* CTAALR    | 185.25 | 162.49 | 2710400000 | 125710000 | 2.2  |
| -                   |        |        |            | 0         |      |
| _SYIFIYDGN* KN* STT | 195.56 | 264.31 | 572140000  | 214890000 | 0.3  |
| TDQN* FTSAK_        |        |        |            | 0         |      |
| _TAADATGLQPILNQF    | 173.77 | 178.32 | 181340000  | 23764000  | 7.6  |
| TPAN* VSR_          |        |        |            |           |      |
| _TAASILWQAYPILN*    | 128.69 | 124.99 | 228200000  | 103310000 | 2.2  |
| ISEK_               |        |        |            |           |      |
| _TAGAN* GTSGFFCV    | 210.98 | 164.98 | 388040000  | 267090000 | 1.5  |
| DEGLPLAQR_          |        |        |            |           |      |
| _TALWVATDHNTDN*     | 214.52 | 58.49  | 120610000  | 41944000  | 2.9  |
| TSAILR_             |        |        |            |           |      |
| _TASVSIN* QTEPPK_   | 161.1  | 57.804 | 30335000   | 10607000  | 2.9  |
| _TCPAGIMGEN* NTL    | 109.48 | 94.007 | 802870000  | 269580000 | 3.0  |
| VWK_                |        |        |            |           |      |
| _TCPLDEFQCN* NTLC   | 51.819 | 80.316 | 62221000   | 53745000  | 1.2  |
| KPLAWK_             |        |        |            |           |      |
| _TCVSN* CTASQFVC    | 116.84 | 113.72 | 265280000  | 165200000 | 1.6  |
| K_                  |        |        |            |           |      |
| _TDAELN* ETARPLSP   | 141.6  | 48.288 | 102260000  | 10633000  | 9.6  |
| VNPK_               |        |        |            |           |      |
| _TDDEVVQREEEAIQ     | 410.11 | 207.86 | 2138600000 | 578520000 | 3.7  |
| LDGLN* ASQIR_       |        |        |            |           |      |
| _TEKDPQNDPVGTCY     | 188.44 | 204.21 | 737380000  | 270570000 | 2.7  |
| LSTEN* FTR_         |        |        |            |           |      |
| _TELDLRPQ* GLALFS   | 176.73 | 134.29 | 138820000  | 47314000  | 2.9  |
| N* VSEAR_           |        |        |            |           |      |
| _TEQIPVN* K_        | 81.296 | 54.776 | 24431000   | 5946500   | 4.1  |
| _TIEQERN* ASFVYTK   | 194.01 | 222.45 | 1607700000 | 639060000 | 2.5  |
| -                   |        |        |            |           |      |
| _TILVDN* NTWN* NT   | 249.66 | 202.13 | 987520000  | 477880000 | 2.1  |
| HISR_               |        |        |            |           |      |
| _TILVDNNTWN* NTHI   | 258.91 | 309.83 | 7398600000 | 850970000 | 8.7  |
| SR_                 |        |        |            |           |      |
| _TLAGEN* QTALEIEE   | 189.31 | 124.92 | 28660000   | 6780100   | 4.2  |
| LNR_                |        |        |            |           |      |
| _TLTLLN* VTRN* DTG  | 447.02 | 165.9  | 3334100000 | 475090000 | 7.0  |

|                   |        |        |             |           |      |
|-------------------|--------|--------|-------------|-----------|------|
| PYVCETR_          |        |        |             |           |      |
| _TLTLLN*VTRN*DTG  | 447.02 | 309.83 | 2439800000  | 143400000 | 1.7  |
| PYVCETR_          |        |        |             | 0         |      |
| _TMVFPVMYLN*ESV   | 256.07 | 82.477 | 1171900000  | 27942000  | 41.9 |
| LIDKETANQLK_      |        |        |             |           |      |
| _TN*QSAELIQPVATN  | 148.33 | 82.449 | 81172000    | 17413000  | 4.7  |
| *GK_              |        |        |             |           |      |
| _TN*QSCSELVIDSTEK | 192.24 | 155.09 | 482630000   | 102510000 | 4.7  |
| -                 |        |        |             |           |      |
| _TN*STQVSDVR_     | 156.48 | 97.734 | 53944000    | 38156000  | 1.4  |
| _TN*TTQDEQHQWTS   | 119.23 | 56.424 | 23883000    | 10681000  | 2.2  |
| CDQQEK_           |        |        |             |           |      |
| _TPMTN*SSIR_      | 155.42 | 110.88 | 133210000   | 13033000  | 10.2 |
| _TQ*LTCSLN*SSGVD  | 296.72 | 306.77 | 8729900000  | 186150000 | 4.7  |
| IVGHR_            |        |        |             | 0         |      |
| _TQN*GSLPAVTR_    | 151.79 | 144.7  | 170360000   | 68877000  | 2.5  |
| _TSDTGEEEAITN*ST  |        |        |             | 293170000 |      |
| EAN*GKYVVVSTPEK   | 290.2  | 322.93 | 6036500000  | 0         | 2.1  |
| -                 |        |        |             |           |      |
| _TTLVDN*N*TWN*N   | 103.5  | 128.06 | 142540000   | 50640000  | 2.8  |
| SHIALVGK_         |        |        |             |           |      |
| _TVAN*LSGCEATDSE  | 393.04 | 406.73 | 17195000000 | 818870000 | 2.1  |
| ALIHCLR_          |        |        |             | 0         |      |
| _TVN*SLN*VSAISIPE | 143.67 | 123.14 | 182750000   | 53394000  | 3.4  |
| HDEADDISDENR_     |        |        |             |           |      |
| _TVVVDN*ETVATR_   | 88.021 | 56.122 | 49560000    | 12229000  | 4.1  |
| _TYCANEPSLN*CSQV  | 151.8  | 128.06 | 97094000    | 50640000  | 1.9  |
| N*R_              |        |        |             |           |      |
| _TYCANEPSLN*CSQV  | 151.8  | 91.114 | 97094000    | 127690000 | 0.8  |
| N*R_              |        |        |             |           |      |
| _TYEN*GSSVEYR_    | 167.12 | 107.85 | 49262000    | 99360000  | 0.5  |
| _VAGLLVLN*YSN*D   | 43.115 | 80.238 | 10585000    | 12400000  | 0.9  |
| YNHWLATAK_        |        |        |             |           |      |
| _VDCTANTN*TCNK_   | 229.64 | 143.79 | 290110000   | 16554000  | 17.5 |
| _VDIPQQPMGIIAVAN  | 127.14 | 50.498 | 77436000    | 66076000  | 1.2  |
| *DTN*SCELSPCR_    |        |        |             |           |      |
| _VDLEDFEN*NTAYAK  | 161.63 | 176.91 | 389240000   | 592440000 | 0.7  |
| K_                |        |        |             |           |      |
| _VETGEN*CTSPAPK_  | 130.1  | 131.13 | 295800000   | 39275000  | 7.5  |
| -                 |        |        |             |           |      |
| _VFGSQN*LTTVK_    | 139.86 | 124.1  | 4348000000  | 204730000 | 2.1  |
|                   |        |        |             | 0         |      |
| _VFN*GKDN*ISK_    | 112.89 | 104.43 | 279030000   | 64908000  | 4.3  |
| _VGCSEYTN*R_      | 201.58 | 191.85 | 502360000   | 166400000 | 3.0  |
| _VGLVITYSN*ETR_   | 137.89 | 113.67 | 200490000   | 75310000  | 2.7  |

|                                   |        |        |            |           |           |
|-----------------------------------|--------|--------|------------|-----------|-----------|
| _VIDLWDLAQSAN*F<br>TEK_           | 122.93 | 56.407 | 135460000  | 12128000  | 11.2      |
| _VILILDPAISGN*ETE<br>PYPAFTR_     | 158.74 | 106.03 | 112000000  | 18318000  | 6.1       |
| _VIN*DTWAWKN*AT<br>LAEQAK_        | 169.44 | 124.23 | 385560000  | 184680000 | 2.1       |
| _VIN*DTWAWKN*AT<br>LAEQAK_        | 120.99 | 112.8  | 631160000  | 246210000 | 2.6       |
| _VISN*N*CTSYGVLD<br>IGK_          | 84.874 | 82.586 | 55884000   | 24398000  | 2.3       |
| _VISN*N*CTSYGVLD<br>IGK_          | 116.35 | 106.19 | 188410000  | 123710000 | 1.5       |
| _VIYN*LTEK_                       | 117.04 | 131.06 | 537030000  | 117470000 | 4.6       |
| _VLN*ADQGTSATVQ<br>MLLN*DTCPLFVR_ | 240.31 | 160.57 | 611480000  | 65487000  | 9.3       |
| _VLN*LTDNTYFK_                    | 94.767 | 89.403 | 153300000  | 26813000  | 5.7       |
| _VLN*N*ITNDLR_                    | 185.6  | 194.06 | 236740000  | 131570000 | 1.8       |
| _VLPFN*VTDYCQLV<br>R_             | 93.348 | 101.32 | 50345000   | 85099000  | 0.6       |
| _VLQVVN*VTK_                      | 81.099 | 90.108 | 268380000  | 101320000 | 2.6       |
| _VLTNQESPYQN*HT<br>GR_            | 169.04 | 164.68 | 178610000  | 50727000  | 3.5       |
| _VLVAPPSEEAN*TTK<br>_             | 134.61 | 143.94 | 1448200000 | 287570000 | 5.0       |
| _VLYLPAYN*CTLRP<br>VSK_           | 197.49 | 42.947 | 200810000  | 20299000  | 9.9       |
| _VN*GTLTQVLLVGA<br>PTHDDVSK_      | 102.24 | 34.217 | 119120000  | 54190000  | 2.2       |
| _VN*ITVLPSLTSR_                   | 140.45 | 127.56 | 163940000  | 146950000 | 1.1       |
| _VN*KTEEDYAR_                     | 156.48 | 142.71 | 1100900000 | 184840000 | 6.0       |
| _VN*LSFPSAQLPAS<br>DTHLK_         | 146.06 | 120.11 | 2173200000 | 714800000 | 3.0       |
| _VN*SSLHSQISR_                    | 229.95 | 142.19 | 388440000  | 55069000  | 7.1       |
| _VN*YTEVSR_                       | 131.06 | 111.95 | 60530000   | 10547000  | 5.7       |
| _VNDN*KTAAEEALR<br>_              | 146.5  | 109.22 | 141480000  | 19988000  | 7.1       |
| _VNRFN*STEYQVVT<br>R_             | 263.15 | 235.88 | 1239500000 | 653880000 | 1.9       |
| _VNYEGGTWDWIAE<br>ALSSN*HTR_      | 171.85 | 54.672 | 596410000  | 5419700   | 110.<br>0 |
| _VPFIFNINPATTN*FT<br>GSCQPQSAQLR_ | 179.42 | 109.56 | 66011000   | 57505000  | 1.1       |
| _VQPFN*VTK_                       | 71.692 | 80.684 | 1709300000 | 529690000 | 3.2       |
| _VQSLQTLAAN*NSA                   | 104.45 | 74.786 | 19181000   | 33907000  | 0.6       |



|                  |        |        |            |           |      |
|------------------|--------|--------|------------|-----------|------|
| LAK_             |        |        |            |           |      |
| _VSLTN*VSISEGR_  | 193.28 | 192.15 | 843800000  | 487260000 | 1.7  |
| _VSQVLHEGGHN*VT  | 203.05 | 144.73 | 1289900000 | 42884000  | 30.1 |
| K_               |        |        |            |           |      |
| _VSTLYAN*N*GSVL  | 156.29 | 100.94 | 411360000  | 124860000 | 3.3  |
| QGSTVASVYHK_     |        |        |            |           |      |
| _VTINNWVAN*KTEG  | 178.58 | 149.32 | 927880000  | 140610000 | 6.6  |
| R_               |        |        |            |           |      |
| _VTNSNANAAGPLIV  | 130.65 | 59.539 | 71447000   | 102050000 | 0.7  |
| AGYN*VSGSVR_     |        |        |            |           |      |
| _VTPVCN*ASLPAQR_ | 109.15 | 67.275 | 45342000   | 16869000  | 2.7  |
| _VVDKGN*GSKPTSP  | 112.74 | 84.653 | 346620000  | 20341000  | 17.0 |
| EEVK_            |        |        |            |           |      |
| _VVELLADIVQN*SSL | 126.61 | 84.762 | 58354000   | 19215000  | 3.0  |
| EDSQIEKER_       |        |        |            |           |      |
| _VVFLSPAVPEEPEAY | 111.82 | 58.479 | 159600000  | 9491200   | 16.8 |
| N*LTVLIR_        |        |        |            |           |      |
| _VVLHPN*HSVVDIGL | 207.79 | 154.88 | 3676800000 | 304780000 | 12.1 |
| IK_              |        |        |            |           |      |
| _VVN*VSELYGTPCT  | 131.66 | 170.52 | 155700000  | 128130000 | 1.2  |
| K_               |        |        |            |           |      |
| _VVTPEEYFN*VTLQ_ | 42.629 | 46.985 | 50640000   | 47784000  | 1.1  |
| _VWDTAAALN*R_    | 103.7  | 79.974 | 8681200    | 7302700   | 1.2  |
| _VYGGIVN*QSEINEG | 139.88 | 70.802 | 53293000   | 18400000  | 2.9  |
| TAFFR_           |        |        |            |           |      |
| _VYN*GSVPFEER_   | 155.26 | 98.156 | 465700000  | 123930000 | 3.8  |
| _VYTYADTPNDFQLS  | 98.703 | 92.792 | 235290000  | 138130000 | 1.7  |
| N*FSLPEEDTK_     |        |        |            |           |      |
| _VYVYAVN*QTR_    | 166.34 | 159.4  | 108710000  | 81255000  | 1.3  |
| _WDPEPN*CTSK_    | 78.653 | 69.721 | 255080000  | 75667000  | 3.4  |
| _WLCDGDN*DCGN*S  | 238.56 | 104.63 | 547670000  | 51108000  | 10.7 |
| EDESN*ATCSAR_    |        |        |            |           |      |
| _WLCDGDN*DCGN*S  | 114.46 | 163.85 | 34321000   | 273040000 | 0.1  |
| EDESN*ATCSAR_    |        |        |            |           |      |
| _WLN*ETQLK_      | 82.426 | 82.452 | 87233000   | 25552000  | 3.4  |
| _WTDNTEYN*NTIPIR | 190.82 | 133.71 | 444390000  | 115470000 | 3.8  |
| GEER_            |        |        |            |           |      |
| _WTGHN*VTVVQR_   | 199.82 | 191.33 | 963290000  | 121480000 | 7.9  |
| _YATEN*DISSLHN*S | 208.3  | 201.88 | 3646700000 | 435530000 | 8.4  |
| TLTCLVN*QTSLTGT  |        |        |            |           |      |
| SPEIMEK_         |        |        |            |           |      |
| _YATEN*DISSLHN*S | 208.3  | 201.88 | 4383900000 | 460220000 | 9.5  |
| TLTCLVN*QTSLTGT  |        |        |            |           |      |
| SPEIMEK_         |        |        |            |           |      |

|                                     |        |        |            |                |      |
|-------------------------------------|--------|--------|------------|----------------|------|
| _YEQLQN*ETR_                        | 179.8  | 185.6  | 558890000  | 150670000      | 3.7  |
| _YEVDWN*QSTLDCV<br>DPLSSLAAN*R_     | 214.27 | 85.932 | 405190000  | 16743000       | 24.2 |
| _YEVDWN*QSTLDCV<br>DPLSSLAAN*R_     | 214.27 | 85.932 | 334400000  | 21057000       | 15.9 |
| _YFAN*CTVR_                         | 159.04 | 133.55 | 146900000  | 42892000       | 3.4  |
| _YGKN*DSLTLTQLK_                    | 136.17 | 170.74 | 830780000  | 135070000      | 6.2  |
| _YGPQCN*R_                          | 111.69 | 86.113 | 37456000   | 4730600        | 7.9  |
| _YLELGN*ETLLR_                      | 255.24 | 176.48 | 1463300000 | 491720000      | 3.0  |
| _YLKN*GN*ATLLR_                     | 160.75 | 176.95 | 2684400000 | 684420000      | 3.9  |
| _YLN*ETQQLTQK_                      | 192.5  | 199.68 | 8763500000 | 390480000<br>0 | 2.2  |
| _YLQPLLAVQFTN*LT<br>VDTEIR_         | 191.61 | 155.49 | 418090000  | 142670000      | 2.9  |
| _YPAEGQRPIPN*VSL<br>PLR_            | 145.1  | 74.12  | 97039000   | 5097700        | 19.0 |
| _YPQDYQFYIQN*FTA<br>LPLNTVVPPQR_    | 172.3  | 161.04 | 1483100000 | 254920000      | 5.8  |
| _YPTPGEAPGVVGNF<br>N*K_             | 151.22 | 136.17 | 195900000  | 62156000       | 3.2  |
| _YQTVDSSNIDGFVN*<br>CTK_            | 88.551 | 77.39  | 17651000   | 7340400        | 2.4  |
| _YTGN*ASALLILPDQ<br>GR_             | 187.75 | 169.15 | 3841300000 | 312540000<br>0 | 1.2  |
| _YTSFEYPKN*ISFAC<br>NPGFFLN*GTSSSK_ | 91.618 | 58.877 | 249860000  | 13440000       | 18.6 |
| _YTSFEYPKN*ISFAC<br>NPGFFLN*GTSSSK_ | 91.618 | 58.877 | 249860000  | 32765000       | 7.6  |
| _YVQN*GTYTAK_                       | 115.78 | 115.78 | 296700000  | 122970000      | 2.4  |
